# Supplementary material for: Age-associated changes in lineage composition of the enteric nervous system regulate gut health and disease
Source: PubMed Central journal article supplement (PMC10727506; doi:10.7554/elife.88051), 2023-12-18

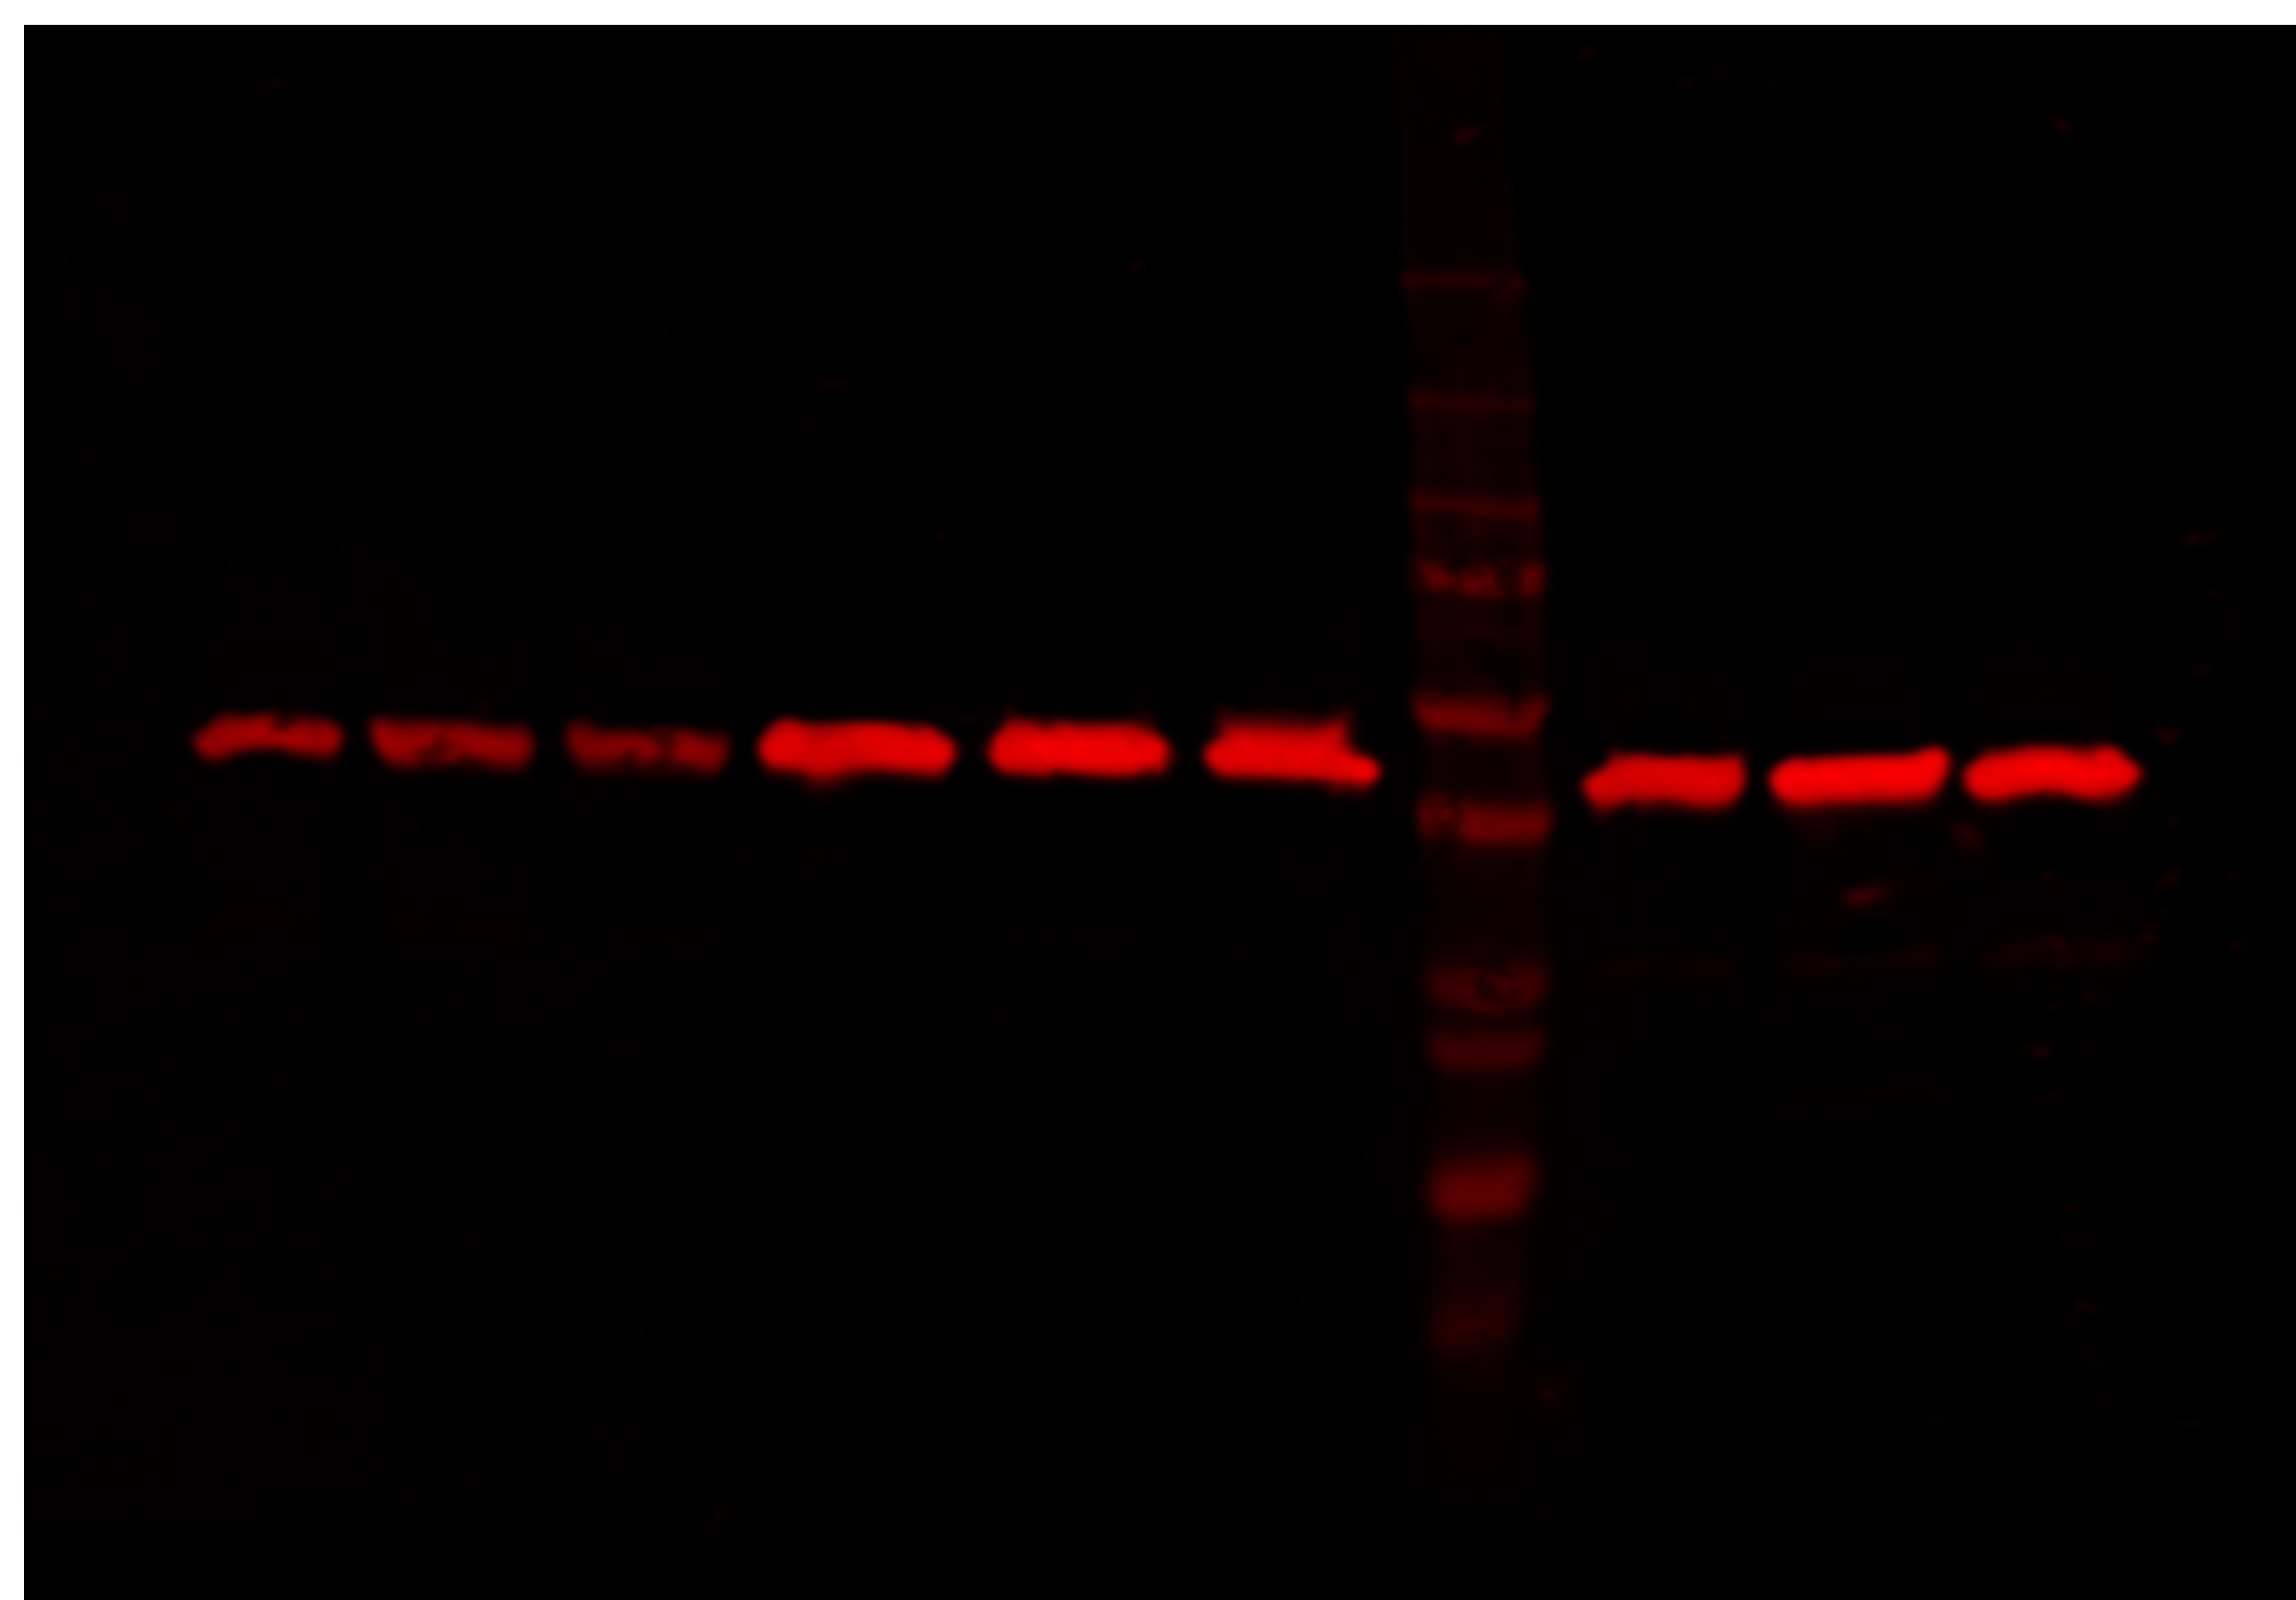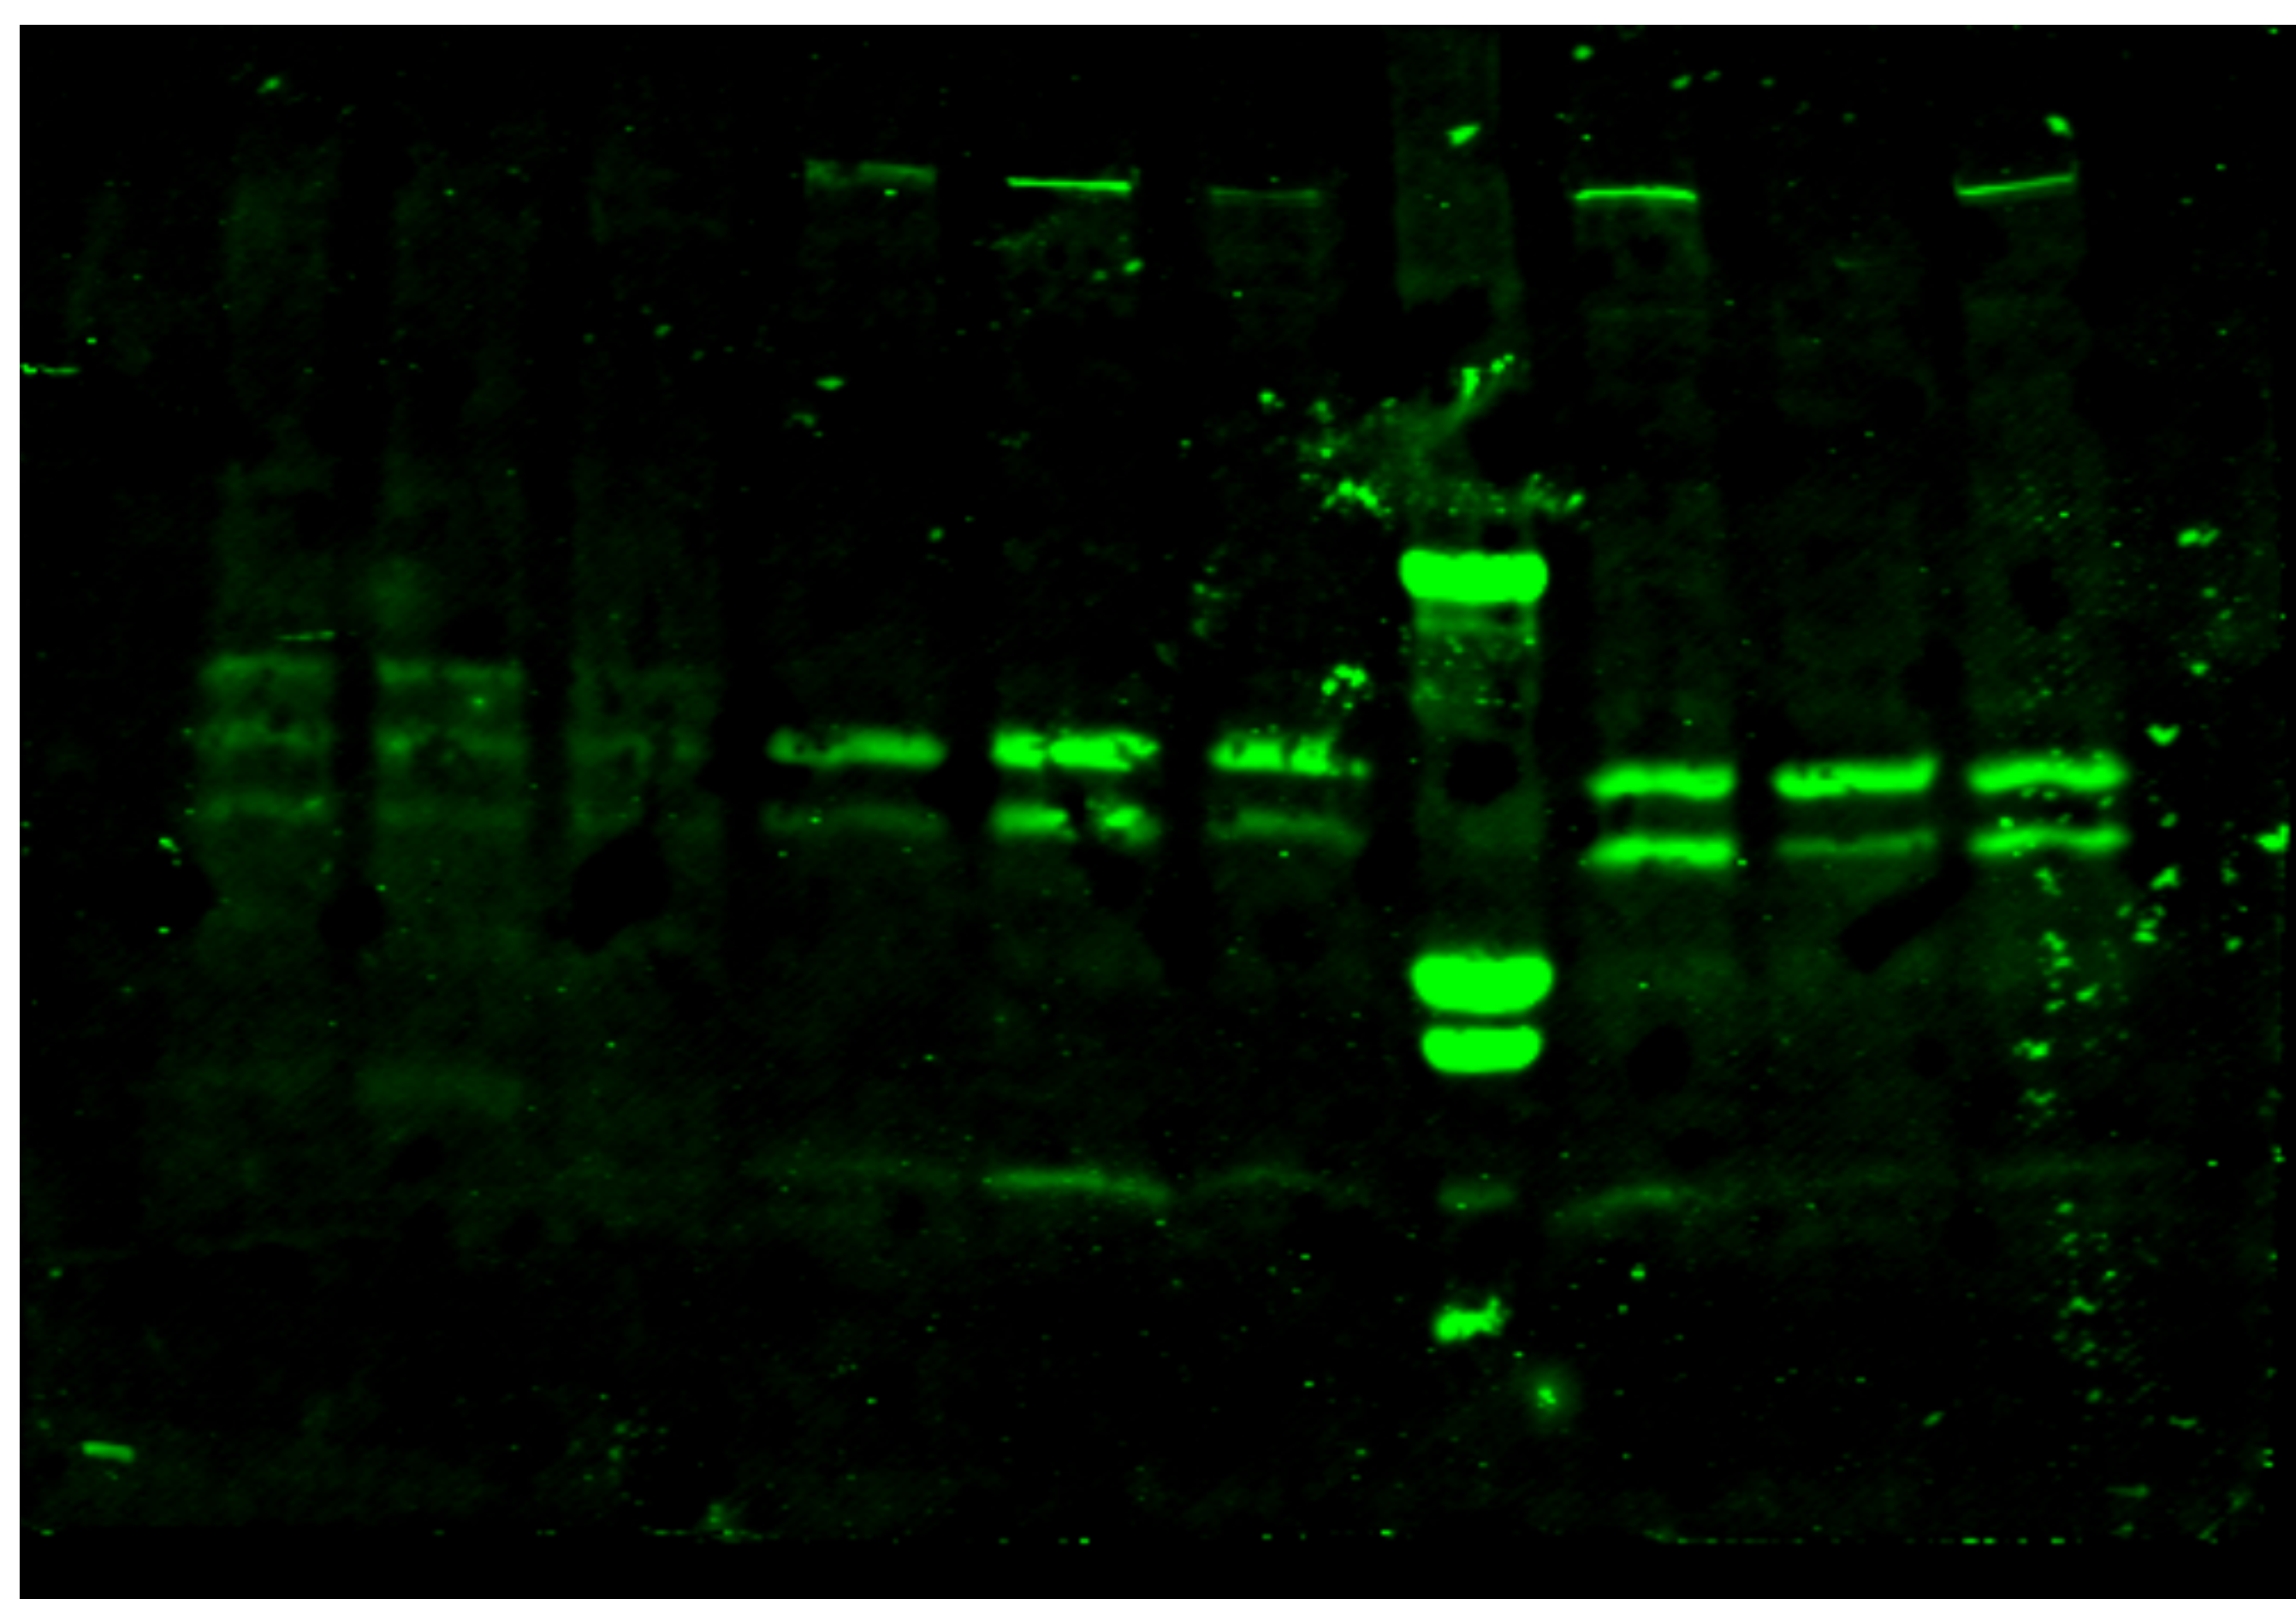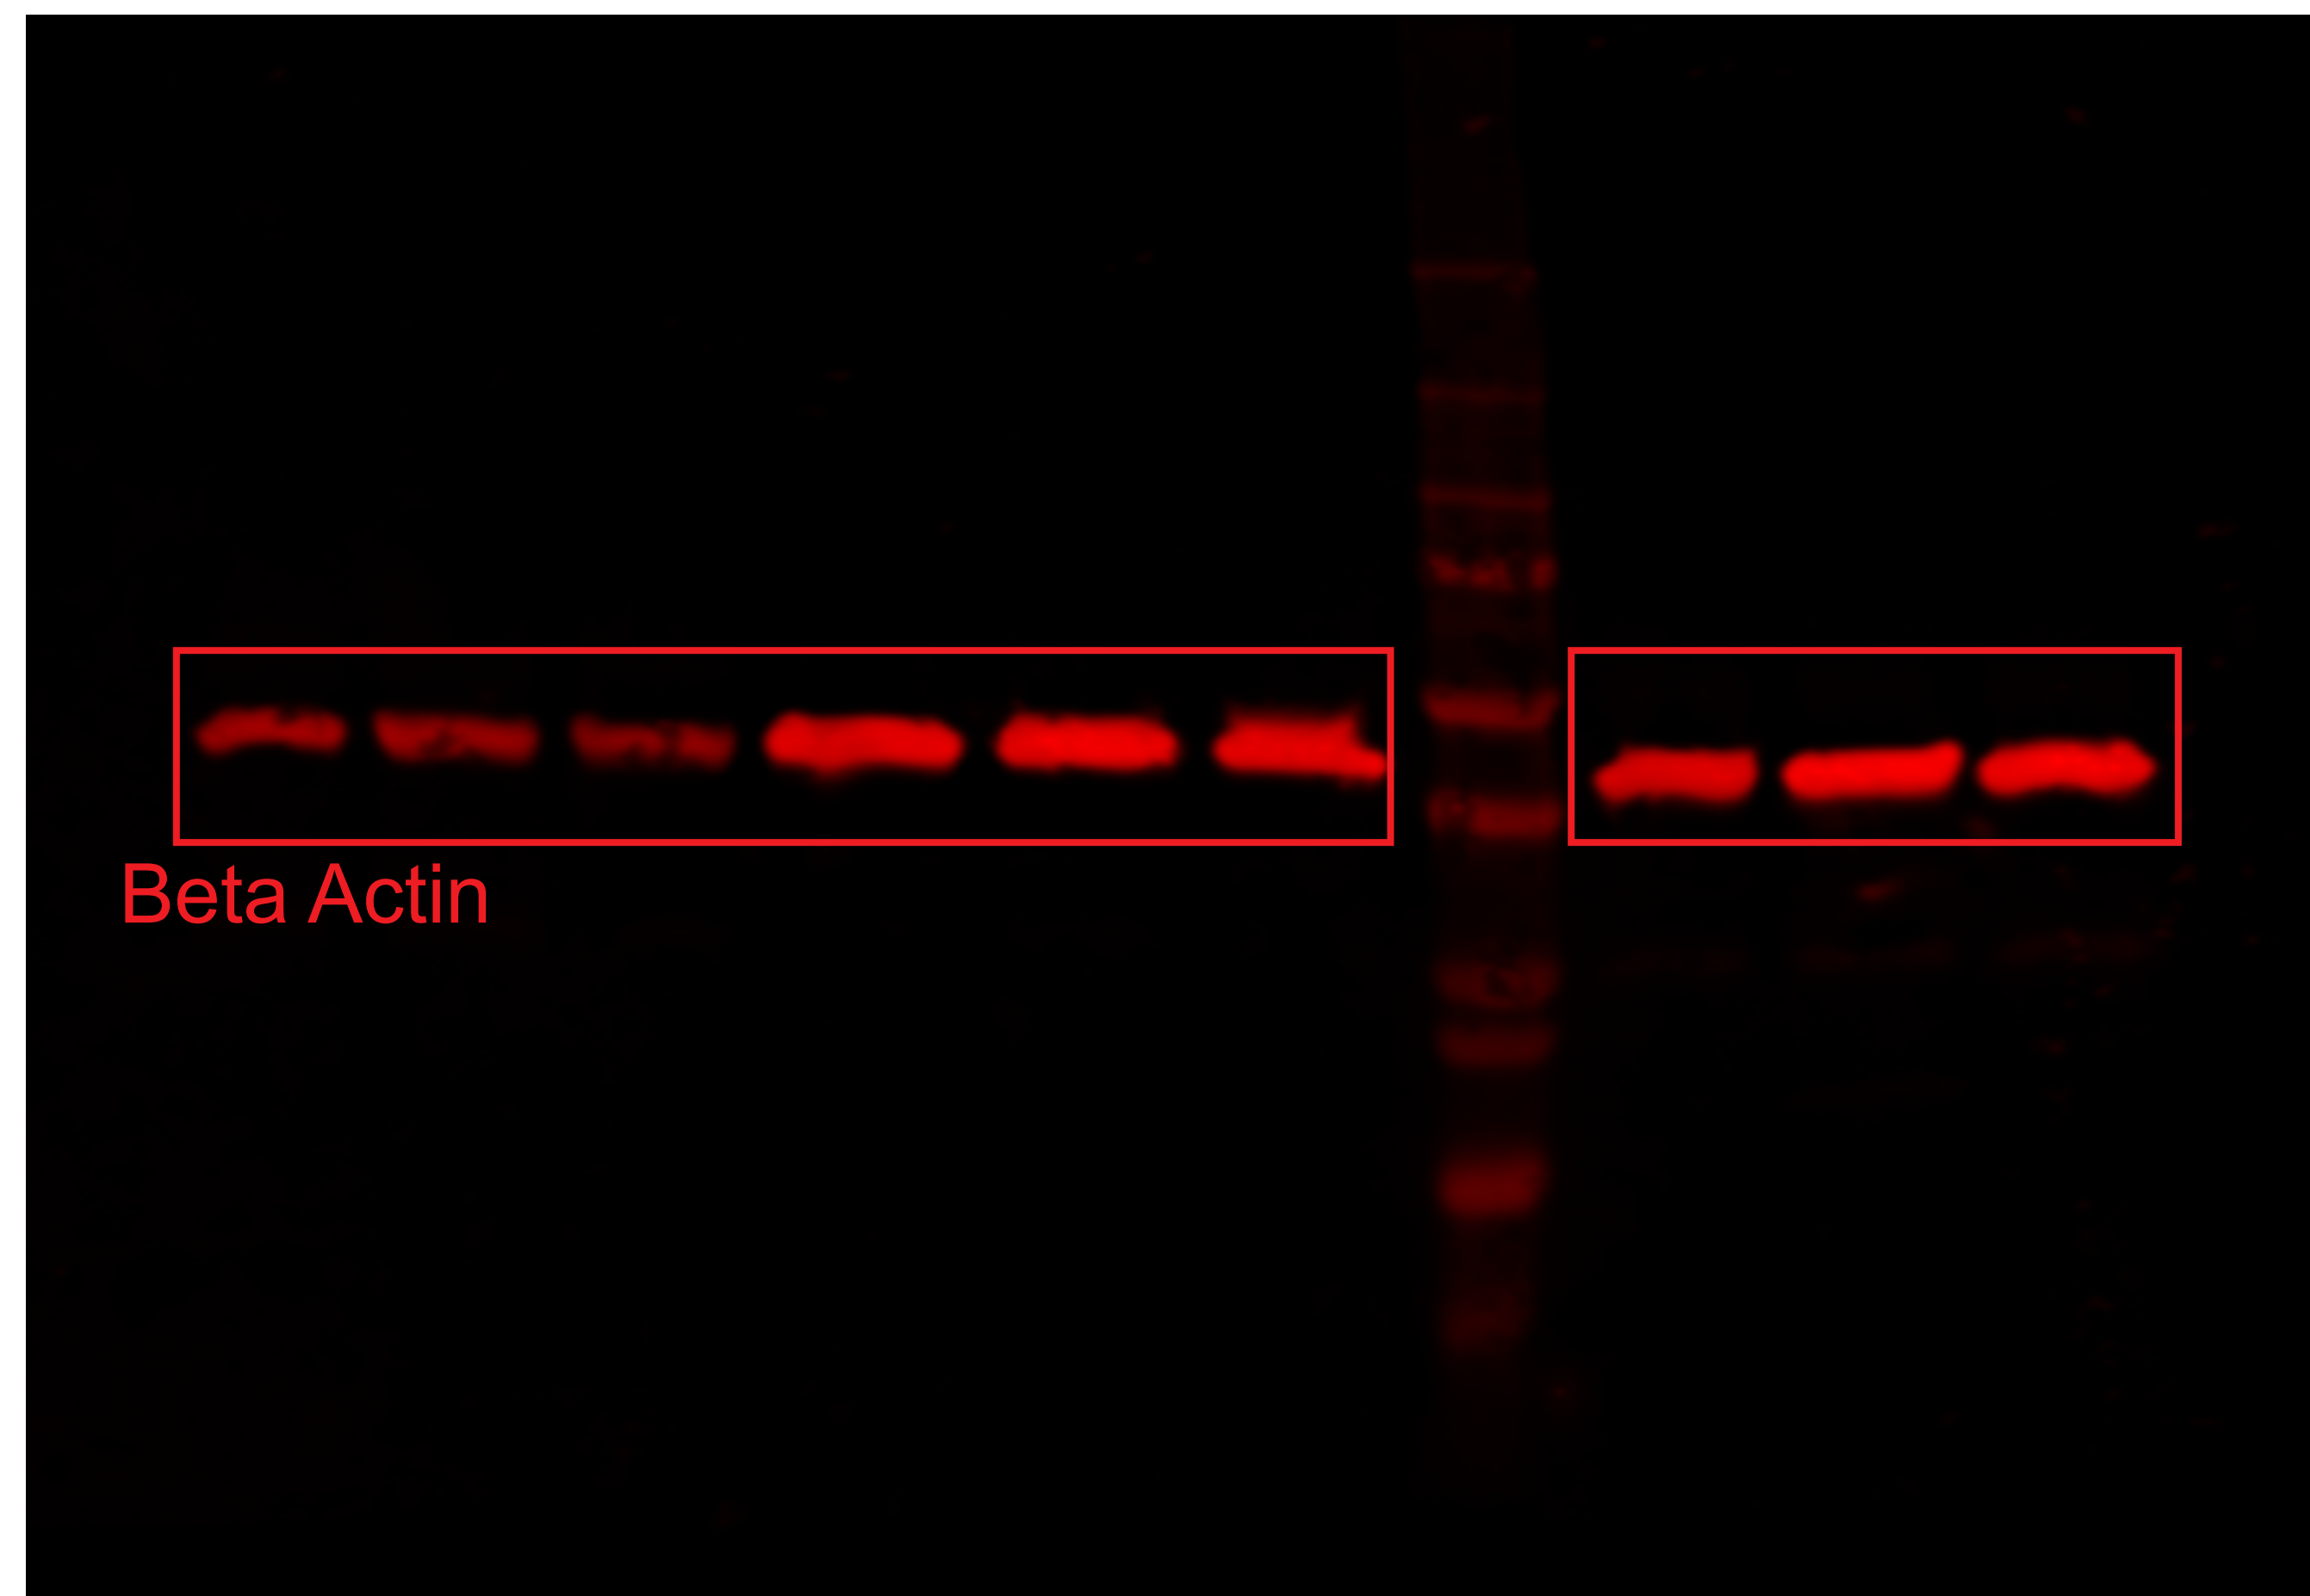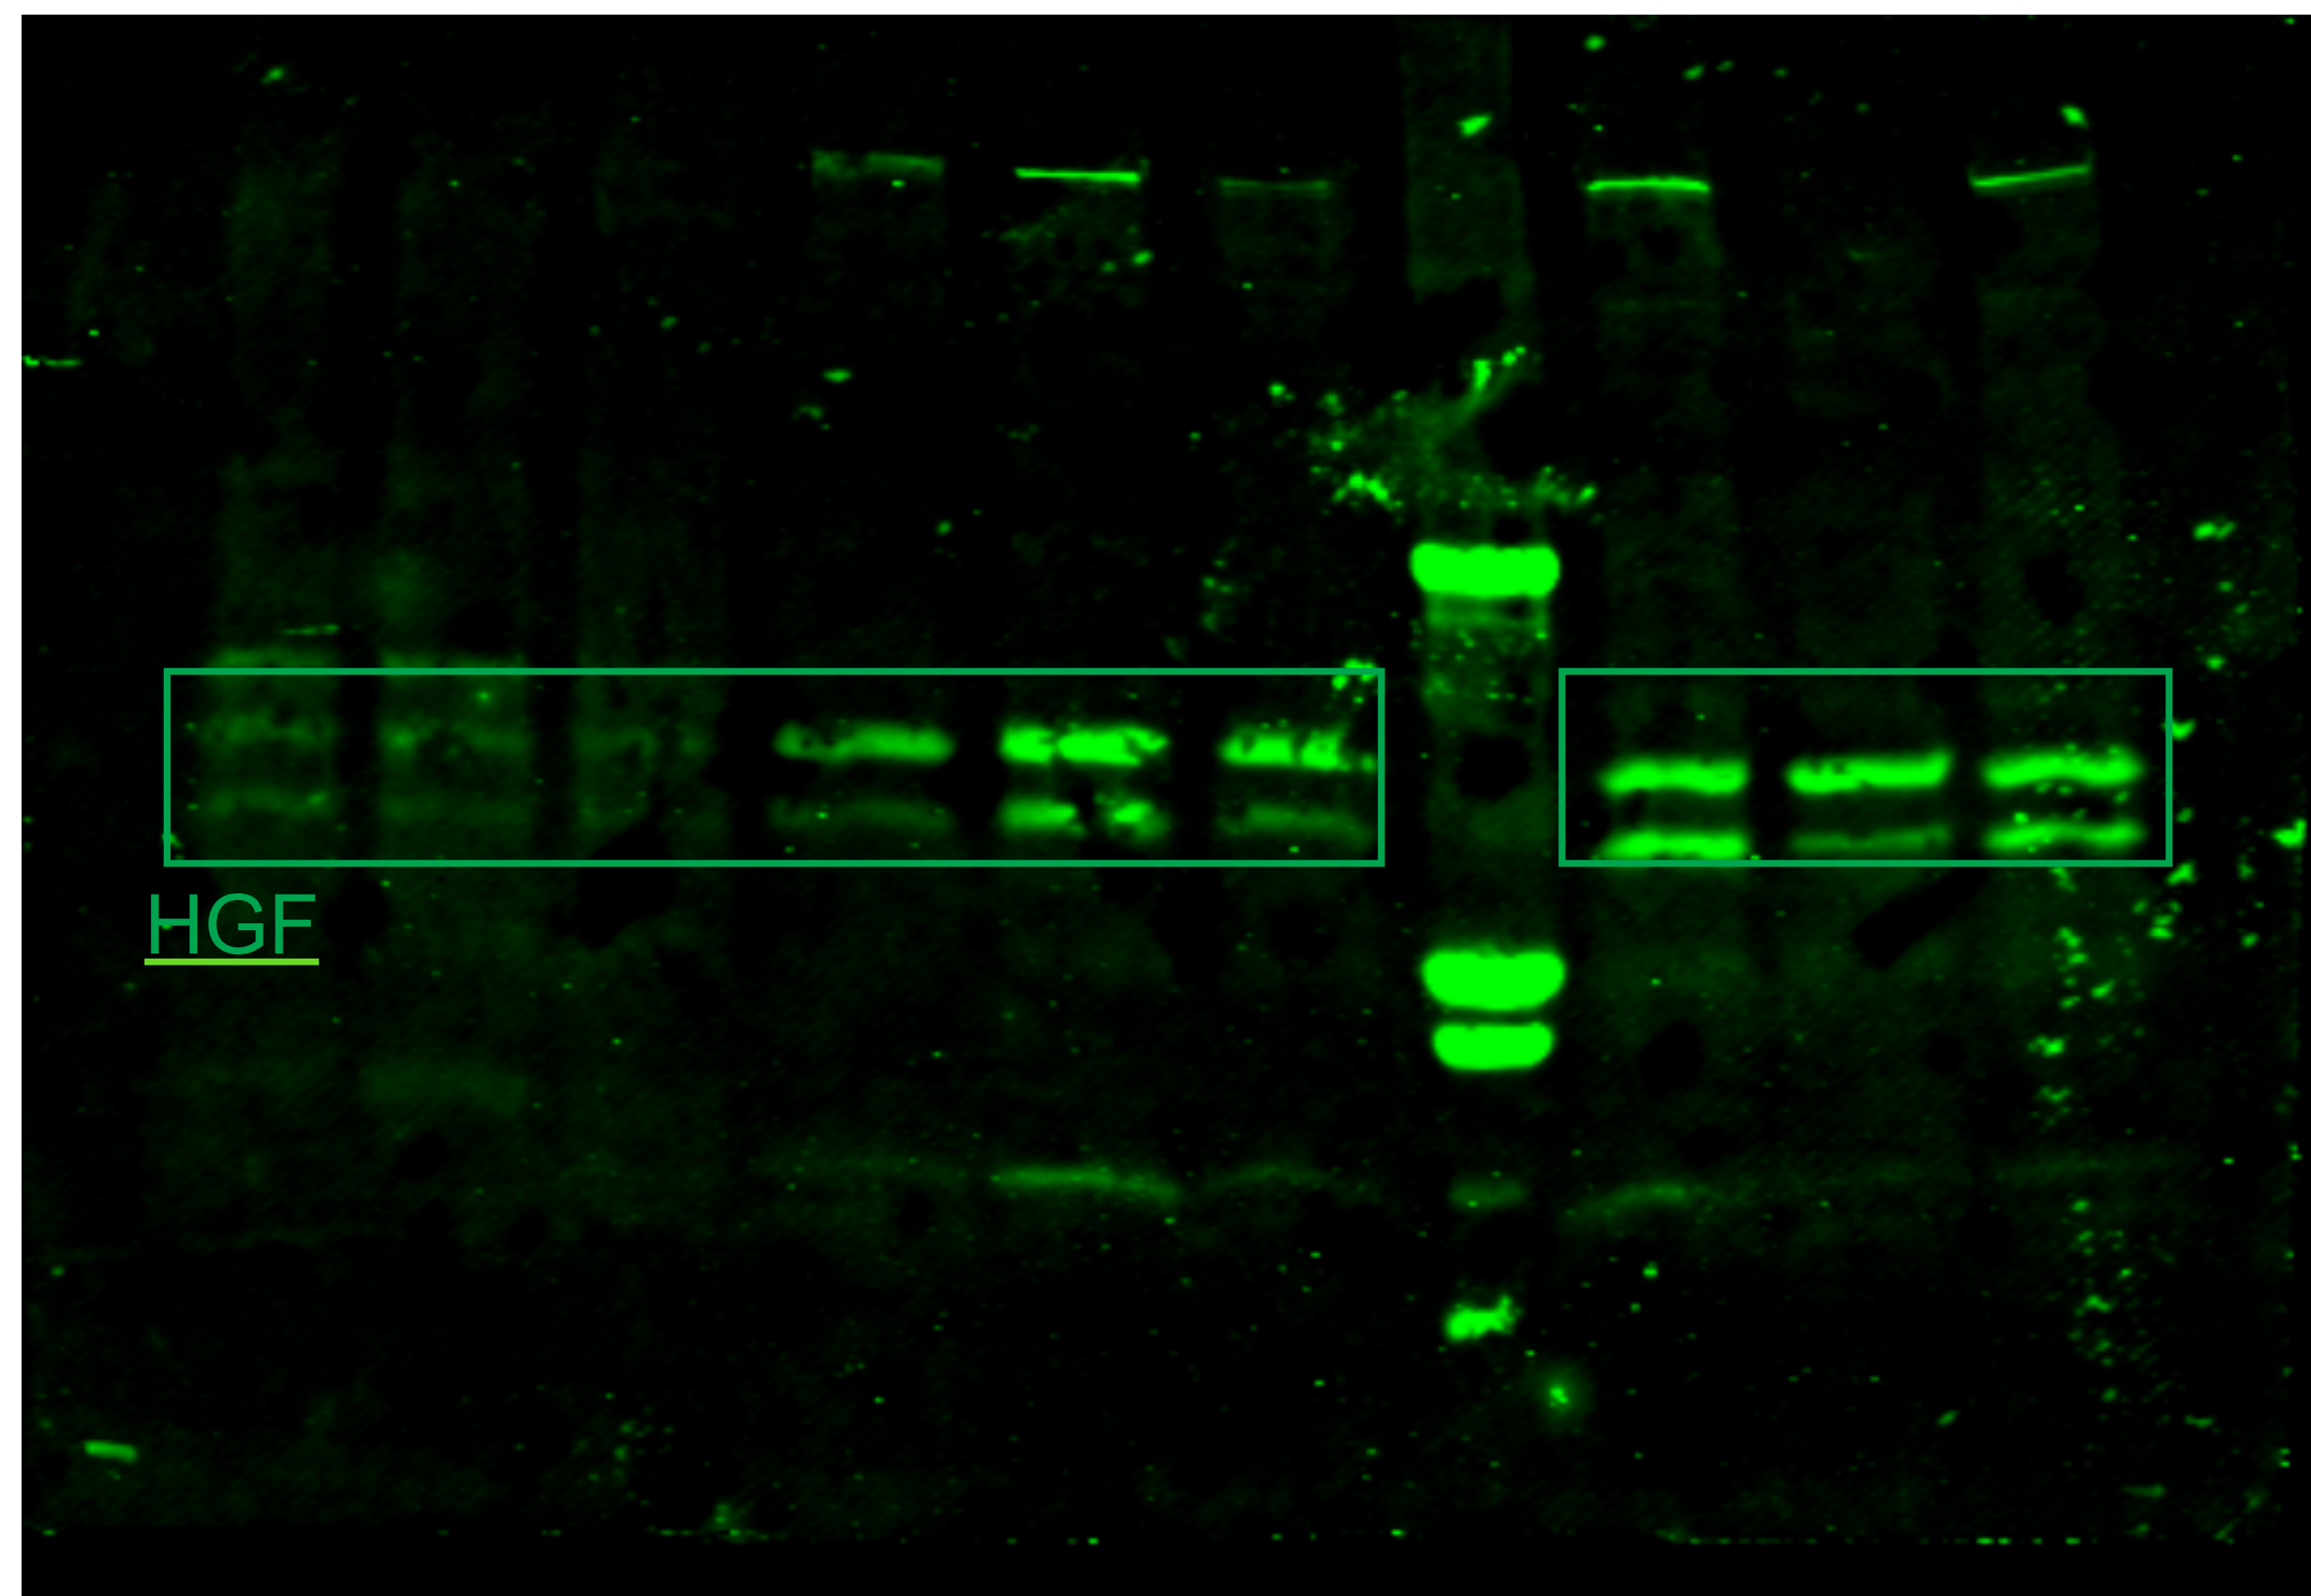

Supplement: elife-88051-fig10-data2.pdf [file elife-88051-fig10-data2.pdf]
