# Supplementary material for: Age-associated changes in lineage composition of the enteric nervous system regulate gut health and disease
Source: PubMed Central journal article supplement (PMC10727506; doi:10.7554/elife.88051), 2023-12-18
Supplement: elife-88051-supp1.pdf [file elife-88051-supp1.pdf]

**Supplementary Table 1: Table of information on select reagents****Primary Antibodies and Antisera**

| <b>Antigenic target</b> | <b>Species</b> | <b>Company</b>       | <b>Catalogue number</b> | <b>Dilution</b> |
|-------------------------|----------------|----------------------|-------------------------|-----------------|
| HuC/D                   | Human          | Human antisera ANNA1 | ANNA1                   | 1:750 - 1:1000  |
| HuC/D                   | Rabbit         | Abcam                | ab184267                | 1: 500          |
| NOS1                    | Rabbit         | Invitrogen           | 61-7000                 | 1: 200          |
| CGRP                    | Rabbit         | Immunostar           | 24112                   | 1: 500          |
| MET                     | Goat           | R&D systems          | AF276                   | 1: 250          |
| MHCst (S46)             | Mouse          | DHSB Iowa            | S46                     | 1: 250          |
| RET                     | Rabbit         | Abcam                | ab134100                | 1: 500          |
| CDH-3                   | Rabbit         | Abcam                | ab137729                | 1: 500          |
| RFP                     | Rabbit         | Rockland             | 600-401-379             | 1: 500          |
| GFAP                    | Rabbit         | DAKO                 | GA-524                  | 1: 1000         |
| $\beta$ ACTIN           | Mouse          | MP Biomedicals       | 0869100-CF              | 1: 10000        |
| HGF                     | Rabbit         | Abcam                | ab178395                | 1: 500          |
| GDNF                    | Rabbit         | Abcam                | ab18956                 | 1: 500          |
| GFP                     | Chicken        | Aves                 | GFP-1020                | 1: 1000         |
| SLPI                    | Rabbit         | Abxexa               | abx104088               | 1: 200          |
| AEBP1                   | Rabbit         | Biorbyt              | orb537407               | 1: 250          |
| CLIC3                   | Rabbit         | Proteintech          | 15971-1-AP              | 1: 250          |
| CFTR                    | Rabbit         | Abcam                | ab181782                | 1: 500          |
| SMO                     | Rabbit         | Proteintech          | 20787-1-AP              | 1: 250          |
| FMO2                    | Rabbit         | Biorbyt              | orb539506               | 1: 250          |
| MYH11                   | Mouse          | Thermo-Fisher        | MA5-11971               | 1:250           |
| SLC17A9                 | Rabbit         | Proteintech          | 26731-1-AP              | 1:200           |
| IL-18                   | Rabbit         | Abcam                | ab207323                | 1:400           |
| NT-3                    | Rabbit         | Chemicon             | ab1532SP                | 1:200           |
| MYL-7                   | Rabbit         | Abcam                | ab127001                | 1:100           |
| SNAP-25                 | Rabbit         | ProteinTech          | 14903-1-AP              | 1:200           |
| PDE10A                  | Rabbit         | Invitrogen           | PA531293                | 1:250           |
| TUBB2B                  | Rabbit         | Invitrogen           | PA5-48314               | 1:250           |
| ELAVL2                  | Rabbit         | Invitrogen           | 14008-1-AP              | 1:250           |
| HAND2                   | Rabbit         | Invitrogen           | PA5-115339              | 1:250           |
| VSNL1                   | Mouse          | Invitrogen           | 67134-1-Ig              | 1:200           |
| GPR88                   | Rabbit         | Novus Biologicals    | NBP1-02330              | 1:200           |
| STMN2                   | Rabbit         | Invitrogen           | 10586-1-AP              | 1:250           |
| STX3                    | Rabbit         | Invitrogen           | 15556-1-AP              | 1:250           |
| ChAT                    | Rabbit         | Abnova               | PAB14536                | 1:100           |
| DECORIN                 | Mouse          | DSHB                 | 6D6                     | 1:250           |
| ECT2                    | Rabbit         | Bioss                | BS-4102R                | 1:250           |
| PHOX2B                  | Rabbit         | Proteintech          | 25276-1-AP              | 1:250           |

## Secondary Antibodies

| <b>Antigenic target</b> | <b>Species</b> | <b>Company</b> | <b>Catalogue number</b> | <b>Dilution</b> |
|-------------------------|----------------|----------------|-------------------------|-----------------|
| Anti-Rabbit 488         | Goat           | Invitrogen     | A-11008                 | 1:500           |
| Anti-Rabbit 647         | Goat           | Invitrogen     | A-21245                 | 1:500           |
| Anti-Rabbit 647         | Donkey         | Invitrogen     | A-31573                 | 1:500           |
| Anti-Chicken 647        | Donkey         | Invitrogen     | A-78952                 | 1:500           |
| Anti-Chicken 488        | Donkey         | Invitrogen     | A-78948                 | 1:500           |
| Ant-Mouse 647           | Donkey         | Invitrogen     | A-32787                 | 1:500           |
| Anti-Mouse IRdye 680RD  | Donkey         | Li-Cor         | 925-68072               | 1:10000         |
| Anti-Rabbit IRdye 800CW | Donkey         | Li-Cor         | 925-32213               | 1:10000         |

## TaqMan Probes

| Probe ID      | Target | Company    |
|---------------|--------|------------|
| Mm01135184_m1 | Hgf    | Invitrogen |
| Mm00599849_m1 | Gdnf   | Invitrogen |
| Mm00446968_m1 | Hprt   | Invitrogen |
| Mm00436304_m1 | Ret    | Invitrogen |
