# Supplementary material for: Age-associated changes in lineage composition of the enteric nervous system regulate gut health and disease
Source: PubMed Central journal article supplement (PMC10727506; doi:10.7554/elife.88051), 2023-12-18
Supplement: elife-88051-supp3.pdf [file elife-88051-supp3.pdf]

**Supplementary File 3: Raw data of all experiments**

**Percentage of NC-derived and non-NC-derived neurons in adult Wnt1-cre:tdTomato mice**

|         | No of neurons | % Wnt1:tdT+ | % Wnt1:tdT- |
|---------|---------------|-------------|-------------|
| Mouse 1 | 185           | 61.62       | 38.38       |
| Mouse 2 | 276           | 53.62       | 46.38       |
| Mouse 3 | 239           | 45.60       | 54.40       |
| Mouse 4 | 485           | 54.64       | 45.36       |
| Mouse 5 | 686           | 60.64       | 39.36       |
| Mouse 6 | 345           | 58.26       | 41.74       |

**Percentage of mesoderm-derived and non-mesoderm-derived neurons in adult Mesp1-cre:tdTomato mice**

|         | No of neurons | % Mesp1:tdT+ | % Mesp1:tdT- |
|---------|---------------|--------------|--------------|
| Mouse 1 | 147           | 53.06        | 46.94        |
| Mouse 2 | 137           | 53.28        | 46.72        |
| Mouse 3 | 200           | 44.50        | 55.50        |

**Percentage of tdTomato-expressing neurons of all NOS1+ neurons in adult Wnt1-cre:tdTomato mice**

|         | NOS1+ counted | % Wnt1:tdT+ | % Wnt1:tdT- |
|---------|---------------|-------------|-------------|
| Mouse 1 | 248           | 64.04       | 35.96       |
| Mouse 2 | 200           | 78.00       | 22.00       |
| Mouse 3 | 168           | 76.78       | 23.22       |

**Percentage of tdTomato-expressing neurons of all CGRP+ neurons in adult Wnt1-cre:tdTomato mice**

|         | CGRP+ counted | % Wnt1:tdT+ | % Wnt1:tdT- |
|---------|---------------|-------------|-------------|
| Mouse 1 | 41            | 25.47       | 74.53       |
| Mouse 2 | 56            | 23.37       | 76.63       |
| Mouse 3 | 49            | 23.87       | 76.13       |

**Age-wise changes in percentages of MENs in myenteric plexus neurons of Wnt1-cre:tdTomato mice**

|   | P11 mice  |        |
|---|-----------|--------|
|   | # neurons | % MENs |
| 1 | 374       | 2.14   |
| 2 | 534       | 10.00  |
| 3 | 419       | 0.23   |

|   | P22 mice  |        | Mean neurons/ganglia |
|---|-----------|--------|----------------------|
|   | # neurons | % MENs |                      |
| 1 | 245       | 29.79  | 16.34 ± 2.07         |
| 2 | 175       | 27.43  | 11.67 ± 2.07         |
| 3 | 322       | 31.68  | 21.47 ± 1.61         |

|   | P60 mice  |        | Mean neurons/ganglia |
|---|-----------|--------|----------------------|
|   | # neurons | % MENs |                      |
| 1 | 185       | 38.38  | 15.42 ± 3.59         |
| 2 | 276       | 46.38  | 21.23 ± 4.22         |
| 3 | 239       | 54.40  | 19.91 ± 3.26         |

|   | P180 mice |        | Mean neurons/ganglia |
|---|-----------|--------|----------------------|
|   | # neurons | % MENs |                      |
| 1 | 171       | 60.97  | 15.54 ± 2.52         |
| 2 | 239       | 50.39  | 21.73 ± 3.69         |
| 3 | 176       | 60.52  | 14.67 ± 1.80         |

|   | P510 mice |        | Mean neurons/ganglia |
|---|-----------|--------|----------------------|
|   | # neurons | % MENs |                      |
| 1 | 261       | 98.85  | 13.74 ± 2.22         |
| 2 | 360       | 93.22  | 17.14 ± 3.46         |
| 3 | 375       | 95.91  | 13.89 ± 1.30         |

**Percentage of MENs in myenteric plexus of P20 Wnt1-cre:tdTomato mice dosed with and without GDNF from the P10 age**

|   | Control   |        |                      | GDNF      |        |                      |
|---|-----------|--------|----------------------|-----------|--------|----------------------|
|   | # neurons | % MENs | Mean neurons/ganglia | # neurons | % MENs | Mean neurons/ganglia |
| 1 | 477       | 22.85  | 22.71 ± 6.99         | 418       | 3.83   | 19.90 ± 4.23         |
| 2 | 296       | 20.27  | 12.86 ± 2.37         | 350       | 4.00   | 15.21 ± 3.38         |
| 3 | 577       | 34.49  | 26.23 ± 4.55         | 533       | 3.75   | 38.00 ± 4.89         |

**Percentage of MENs in myenteric plexus of P20 Wnt1-cre:tdTomato mice dosed with and without HGF from the P10 age**

|   | Control   |        |                      | HGF       |        |                      |
|---|-----------|--------|----------------------|-----------|--------|----------------------|
|   | # neurons | % MENs | Mean neurons/ganglia | # neurons | % MENs | Mean neurons/ganglia |
| 1 | 325       | 23.69  | 15.48 ± 1.88         | 394       | 40.86  | 18.76 ± 2.51         |
| 2 | 439       | 17.77  | 20.90 ± 3.20         | 409       | 40.83  | 19.48 ± 2.88         |
| 3 | 454       | 36.12  | 21.62 ± 3.40         | 386       | 39.38  | 18.38 ± 2.71         |
| 4 | 336       | 44.05  | 16.00 ± 2.46         | 326       | 62.27  | 15.52 ± 1.75         |
| 5 | 416       | 15.38  | 27.73 ± 3.73         | 189       | 63.49  | 18.90 ± 2.01         |

**Percentage of MENs in myenteric plexus of 17 month old mice dosed with and without GDNF**

|   | Control   |        |                      | GDNF      |        |                      |
|---|-----------|--------|----------------------|-----------|--------|----------------------|
|   | # neurons | % MENs | Mean neurons/ganglia | # neurons | % MENs | Mean neurons/ganglia |
| 1 | 141       | 88.65  | 15.67 ± 5.22         | 111       | 84.68  | 12.33 ± 4.11         |
| 2 | 238       | 93.28  | 21.64 ± 6.52         | 215       | 60.00  | 19.54 ± 5.89         |
| 3 | 225       | 89.78  | 20.45 ± 6.16         | 160       | 88.12  | 14.54 ± 4.38         |
| 4 | 213       | 84.04  | 18.54 ± 5.59         | 183       | 60.11  | 17.36 ± 5.23         |
| 5 | 92        | 88.04  | 11.5 ± 4.06          | 130       | 77.69  | 16.25 ± 5.74         |

**Percentage of RET+ NENs in myenteric plexus of 17 month old mice dosed with and without GDNF**

|   | Control   |       |                      | GDNF      |       |                      |
|---|-----------|-------|----------------------|-----------|-------|----------------------|
|   | # neurons | % RET | Mean neurons/ganglia | # neurons | % RET | Mean neurons/ganglia |
| 1 | 170       | 8.23  | 17.00 ± 5.37         | 137       | 19.70 | 13.70 ± 4.33         |
| 2 | 227       | 6.17  | 20.64 ± 6.22         | 198       | 24.24 | 18.00 ± 5.43         |
| 3 | 232       | 5.17  | 21.09 ± 6.36         | 200       | 11.00 | 18.18 ± 5.48         |
| 4 | 188       | 9.04  | 18.8 ± 5.94          | 139       | 24.46 | 15.44 ± 5.14         |

**Percentage of Ret-CFP+ NENs in myenteric plexus of Ret+/- mice at 9 and 16 weeks**

|   | 9 weeks   |        |                      | 16 weeks  |        |                      |
|---|-----------|--------|----------------------|-----------|--------|----------------------|
|   | # neurons | % CFP+ | Mean neurons/ganglia | # neurons | % CFP+ | Mean neurons/ganglia |
| 1 | 268       | 14.18  | 24.36 ± 6.27         | 305       | 10.16  | 16.05 ± 3.68         |
| 2 | 275       | 35.65  | 19.64 ± 2.28         | 306       | 13.40  | 13.91 ± 2.96         |
| 3 | 294       | 28.91  | 24.50 ± 3.40         | 263       | 11.79  | 12.52 ± 2.73         |
| 4 |           |        |                      | 122       | 15.57  | 11.09 ± 3.34         |
| 5 |           |        |                      | 231       | 14.75  | 17.77 ± 4.93         |

**Percentage of MHCst+ MENs in myenteric plexus of Ret+/- and Ret+/+ mice at 9 and 16 weeks**

| Ret+/- | 9 weeks   |        |                      | 16 weeks  |        |                      |
|--------|-----------|--------|----------------------|-----------|--------|----------------------|
|        | # neurons | % MENs | Mean neurons/ganglia | # neurons | % MENs | Mean neurons/ganglia |
| 1      | 197       | 41.12  | 17.91 ± 2.96         | 217       | 56.68  | 19.73 ± 2.69         |
| 2      | 286       | 49.65  | 26.00 ± 3.96         | 218       | 59.17  | 19.82 ± 3.12         |
| 3      | 297       | 39.06  | 19.80 ± 3.62         | 316       | 60.44  | 19.75 ± 2.89         |
| 4      |           |        |                      | 228       | 57.72  | 20.73 ± 4.45         |
| 5      |           |        |                      | 297       | 38.38  | 18.56 ± 4.11         |

| Ret+/- | 9 weeks   |        |                      | 16 weeks  |        |                      |
|--------|-----------|--------|----------------------|-----------|--------|----------------------|
|        | # neurons | % MENs | Mean neurons/ganglia | # neurons | % MENs | Mean neurons/ganglia |
| 1      | 220       | 44.54  | 20.00 ± 3.87         | 182       | 91.21  | 16.54 ± 2.73         |
| 2      | 210       | 69.05  | 19.10 ± 2.73         | 192       | 87.43  | 17.36 ± 1.25         |
| 3      | 214       | 62.62  | 13.37 ± 2.50         | 215       | 83.25  | 13.43 ± 2.01         |
| 4      |           |        |                      | 200       | 70.00  | 18.18 ± 3.74         |
| 5      |           |        |                      | 147       | 82.84  | 21.00 ± 2.40         |

**Percent MET+ neurons**

|   | # MET+ neurons | Wnt1-tdT+ | Wnt1-tdT- |
|---|----------------|-----------|-----------|
| 1 | 68             | 16.18     | 83.82     |
| 2 | 56             | 17.86     | 82.14     |
| 3 | 28             | 21.43     | 78.57     |

**Pattern Weights of the four MEN-specific NMF patterns as represented in the post-natal mesenchymal single cell RNA sequencing data from Gut Cell Atlas**

| Age      | Mean   | Pattern 16     |             |             | Mean    | Pattern 27     |             |                | Mean  | Pattern 32  |                |             | Mean    | Pattern 41 |   |  |
|----------|--------|----------------|-------------|-------------|---------|----------------|-------------|----------------|-------|-------------|----------------|-------------|---------|------------|---|--|
|          |        | Standard Error | Sample size | Sample size |         | Standard Error | Sample size | Standard Error |       | Sample size | Standard Error | Sample size |         |            |   |  |
| Juvenile | 0.0049 | 0.00023        | 5           |             | -0.0036 | 0.0012         | 5           |                | 0.024 | 0.0005      | 5              |             | -0.0029 | 0.0002     | 5 |  |
| Adult    | 0.0049 | 0.0006         | 3           |             | 0.0085  | 0.0021         | 3           |                | 0.028 | 0.0030      | 3              |             | 0.0025  | 0.0028     | 3 |  |
| Aging    | 0.0053 | 0.0007         | 3           |             | 0.0097  | 0.0019         | 3           |                | 0.033 | 0.0016      | 3              |             | 0.0058  | 0.0014     | 3 |  |

**Age-wise changes in whole gut transit time of Ret+/- and Ret+/- mice**

| Age weeks | Whole gut transit time (in minutes) of Ret +/+ mice |     |     |     |     |     |     |     | Whole gut transit time (in minutes) of Ret +/- mice |     |     |     |     |     |     |     |     |     |
|-----------|-----------------------------------------------------|-----|-----|-----|-----|-----|-----|-----|-----------------------------------------------------|-----|-----|-----|-----|-----|-----|-----|-----|-----|
|           | 131                                                 | 119 | 59  | 135 | 113 | 88  | 103 | 86  | 73                                                  | 105 | 93  | 91  | 87  | 83  | 134 | 143 | 153 | 132 |
| 9         |                                                     |     |     |     |     |     |     |     |                                                     |     |     |     |     |     |     |     |     |     |
| 12        | 83                                                  | 89  | 89  | 100 | 106 | 86  | 110 | 78  | 89                                                  | 124 | 106 | 98  | 77  | 71  | 128 | 73  | 82  | 124 |
| 14        | 107                                                 | 103 | 120 | 141 | 111 | 117 | 166 | 110 | 100                                                 | 189 | 190 | 93  | 107 | 106 | 190 | 207 | 125 | 96  |
| 16        | 111                                                 | 130 | 106 | 116 | 130 | 122 | 116 | 140 | 200                                                 | 237 | 194 | 122 | 185 | 157 | 102 | 101 | 156 | 119 |

**Fold change (transcript expression) of Gdnf in murine small intestinal LM-MP at different ages**

|   | P30    | P90    |
|---|--------|--------|
| 1 | 0.8211 | 0.6884 |
| 2 | 0.6600 | 0.6081 |
| 3 | 1.6392 | 0.7047 |
| 4 | 1.6011 | 0.9263 |
| 5 | 0.7185 | 0.1380 |
| 6 | 0.9784 | 0.1683 |

**Expression levels (Fluorescence intensity) of Hgf, compared to Beta-actin, in murine small intestinal LM-MP at different ages**

|   | P10   | P30   | P90   |
|---|-------|-------|-------|
| 1 | 0.008 | 0.007 | 0.022 |
| 2 | 0.006 | 0.017 | 0.013 |
| 3 | 0.006 | 0.011 | 0.016 |

**Expression levels (Fluorescence intensity) of Gdnf, compared to Beta-actin, in murine small intestinal LM-MP at different ages**

|   | P10   | P30   | P90   |
|---|-------|-------|-------|
| 1 | 1.372 | 0.069 | 0.069 |
| 2 | 1.271 | 0.095 | 0.031 |
| 3 | 1.392 | 0.053 | 0.053 |

**Percent MHCst neurons that express tdTomato in Wnt1-cre:tdTomato mice**

|   | MHCst+ neurons counted | Percent tdTomato+ |
|---|------------------------|-------------------|
| 1 | 29                     | 0                 |
| 2 | 30                     | 0                 |
| 3 | 48                     | 0                 |

**Whole gut transit time (in min) of 17 month old mice before and after GDNF or Saline treatment**

|   | Before Treatment |      | After Treatment |      |
|---|------------------|------|-----------------|------|
|   | Control          | GDNF | Control         | GDNF |
| 1 | 210              | 182  | 210             | 74   |
| 2 | 210              | 210  | 164             | 110  |
| 3 | 210              | 152  | 168             | 87   |
| 4 | 172              | 210  | 162             | 123  |
| 5 | 210              | 210  | 171             | 111  |

**Effect of GDNF on MHCst neuron proportions in 17 month old mice**

|   | Control         |        | GDNF            |        |
|---|-----------------|--------|-----------------|--------|
|   | Neurons counted | %MHCst | Neurons counted | %MHCst |
| 1 | 141             | 88.65  | 111             | 84.68  |
| 2 | 238             | 93.27  | 215             | 60.00  |
| 3 | 225             | 89.78  | 160             | 88.12  |
| 4 | 213             | 84.03  | 183             | 60.11  |
| 5 | 92              | 88.04  | 130             | 77.69  |

**Effect of GDNF on RET neuron proportions in 17 month old mice**

|   | Control        |      | GDNF           |      |
|---|----------------|------|----------------|------|
|   | Fields counted | RET+ | Fields counted | RET+ |
| 1 | 10             | 14   | 10             | 27   |
| 2 | 10             | 14   | 10             | 48   |
| 3 | 10             | 12   | 10             | 22   |
| 4 | 12             | 17   | 12             | 34   |

**Effect of GDNF on neuronal numbers in 17 month old mice**

|   | Control      | GDNF         |
|---|--------------|--------------|
| 1 | 15.67 ± 2.63 | 12.33 ± 3.55 |
| 2 | 21.64 ± 4.18 | 19.54 ± 2.55 |
| 3 | 20.45 ± 3.19 | 14.54 ± 1.91 |
| 4 | 18.54 ± 2.84 | 17.36 ± 2.61 |
| 5 | 11.50 ± 3.81 | 16.25 ± 2.30 |

**Fold change (transcript expression) of Hgf in murine small intestinal LM-MP at different ages**

|   | P10   | P30   | P90   |
|---|-------|-------|-------|
| 1 | 2.146 | 5.442 | 6.114 |
| 2 | 1.867 | 4.747 | 5.337 |
| 3 | 0.543 | 2.919 | 4.745 |
| 4 | 0.659 | 2.683 | 4.123 |
| 5 | 0.789 | 2.703 | 5.593 |
| 6 | 0.884 | 2.928 | 5.824 |

**UMI per cluster (6 month data)**

|           | Average ± SEM    | # Cells |
|-----------|------------------|---------|
| MENs      | 4023.91 ± 85.35  | 2223    |
| NENs      | 3391.71 ± 386.52 | 77      |
| Neuroglia | 113              |         |
