# Supplementary material for: Age-associated changes in lineage composition of the enteric nervous system regulate gut health and disease
Source: PubMed Central journal article supplement (PMC10727506; doi:10.7554/elife.88051), 2023-12-18
Supplement: elife-88051-supp4.pdf [file elife-88051-supp4.pdf]

## Supplementary File 4: scRNAseq data metrics for various detected subpopulations

### scRNAseq data metrics from 6 month old mouse LM-MP cells

| n_cells | annotated_type        | pct_batch1 | pct_batch2 | num_genes | mt_ratio | umi     |
|---------|-----------------------|------------|------------|-----------|----------|---------|
| 2248    | Macrophage-A          | 0.551      | 0.449      | 238.8     | 0.09     | 440.98  |
| 2223    | MENs                  | 0.709      | 0.291      | 1255.92   | 0.05     | 4023.91 |
| 1736    | Macrophage-B          | 0.548      | 0.452      | 1073.43   | 0.03     | 2654.48 |
| 1660    | Neuroglia             | 0.74       | 0.26       | 633.96    | 0.06     | 1137.93 |
| 908     | Vascular endothelium  | 0.792      | 0.208      | 854.27    | 0.07     | 1797.43 |
| 776     | Smooth muscle cells   | 0.619      | 0.381      | 302.1     | 0.11     | 527.09  |
| 670     | RBC                   | 0.481      | 0.519      | 94.48     | 0.03     | 2380.12 |
| 240     | Pdgfra+ Fibroblasts   | 0.542      | 0.458      | 776.06    | 0.06     | 1569.2  |
| 163     | B Lymphocytes         | 0.067      | 0.933      | 602.87    | 0.05     | 1335.6  |
| 101     | Penk+ Fibroblasts     | 0          | 1          | 1008.13   | 0.04     | 2272.25 |
| 80      | T cells               | 0.125      | 0.875      | 763.98    | 0.05     | 1762.33 |
| 58      | NENs                  | 0.741      | 0.259      | 1031.98   | 0.07     | 3105.91 |
| 39      | NK cells              | 0.256      | 0.744      | 752.21    | 0.04     | 1577.36 |
| 38      | Macrophage-C          | 0.553      | 0.447      | 1631.5    | 0.03     | 4486.82 |
| 38      | NK cells              | 0.184      | 0.816      | 711.11    | 0.04     | 1480    |
| 34      | Macrophage-C          | 0.206      | 0.794      | 1334.94   | 0.02     | 4124.62 |
| 31      | Smooth muscle cells B | 0.742      | 0.258      | 588.87    | 0.05     | 975.58  |
| 22      | Macrophage-B          | 0.727      | 0.273      | 1646.05   | 0.02     | 4178.14 |
| 22      | Unknown               | 0.136      | 0.864      | 637.55    | 0.09     | 1617.18 |
| 19      | NENs                  | 0.105      | 0.895      | 1391.16   | 0.06     | 4264.16 |
| 17      | Macrophage-C          | 0.294      | 0.706      | 1813.35   | 0.03     | 6721.53 |

### scRNAseq data metrics from P21 mouse LM-MP cells

| n_cells | annotated_type | pct_batch1 | pct_batch2 | num_genes | mt_ratio | umi     | umi_sem |
|---------|----------------|------------|------------|-----------|----------|---------|---------|
| 277     | Endothelial    | 0.794      | 0.206      | 1712.19   | 0.05     | 5163.03 | 310.22  |
| 2165    | Fibroblasts    | 0.824      | 0.176      | 1239.34   | 0.07     | 3187.54 | 68.51   |
| 312     | ICC            | 0.76       | 0.24       | 1253.98   | 0.09     | 3001.8  | 169.94  |
| 231     | Macrophage     | 0.879      | 0.121      | 2190.81   | 0.05     | 7270.13 | 478.34  |
| 510     | MENs           | 0.751      | 0.249      | 1948.45   | 0.05     | 8891.84 | 393.74  |
| 526     | NENs           | 0.743      | 0.257      | 1521.41   | 0.09     | 3263.34 | 142.29  |
| 844     | Neuroglia      | 0.724      | 0.276      | 1501.25   | 0.06     | 3493.49 | 120.25  |
| 322     | RBC            | 0.913      | 0.087      | 336.07    | 0.02     | 3792.37 | 211.34  |
| 5867    | SMC            | 0.937      | 0.063      | 478.69    | 0.11     | 817.77  | 10.68   |
| 210     | Unknown        | 0.91       | 0.09       | 1302.01   | 0.12     | 4767.06 | 328.96  |
