# Supplementary material for: Age-associated changes in lineage composition of the enteric nervous system regulate gut health and disease
Source: eLife journal article supplement (doi:10.7554/elife.88051), 2023-08-08

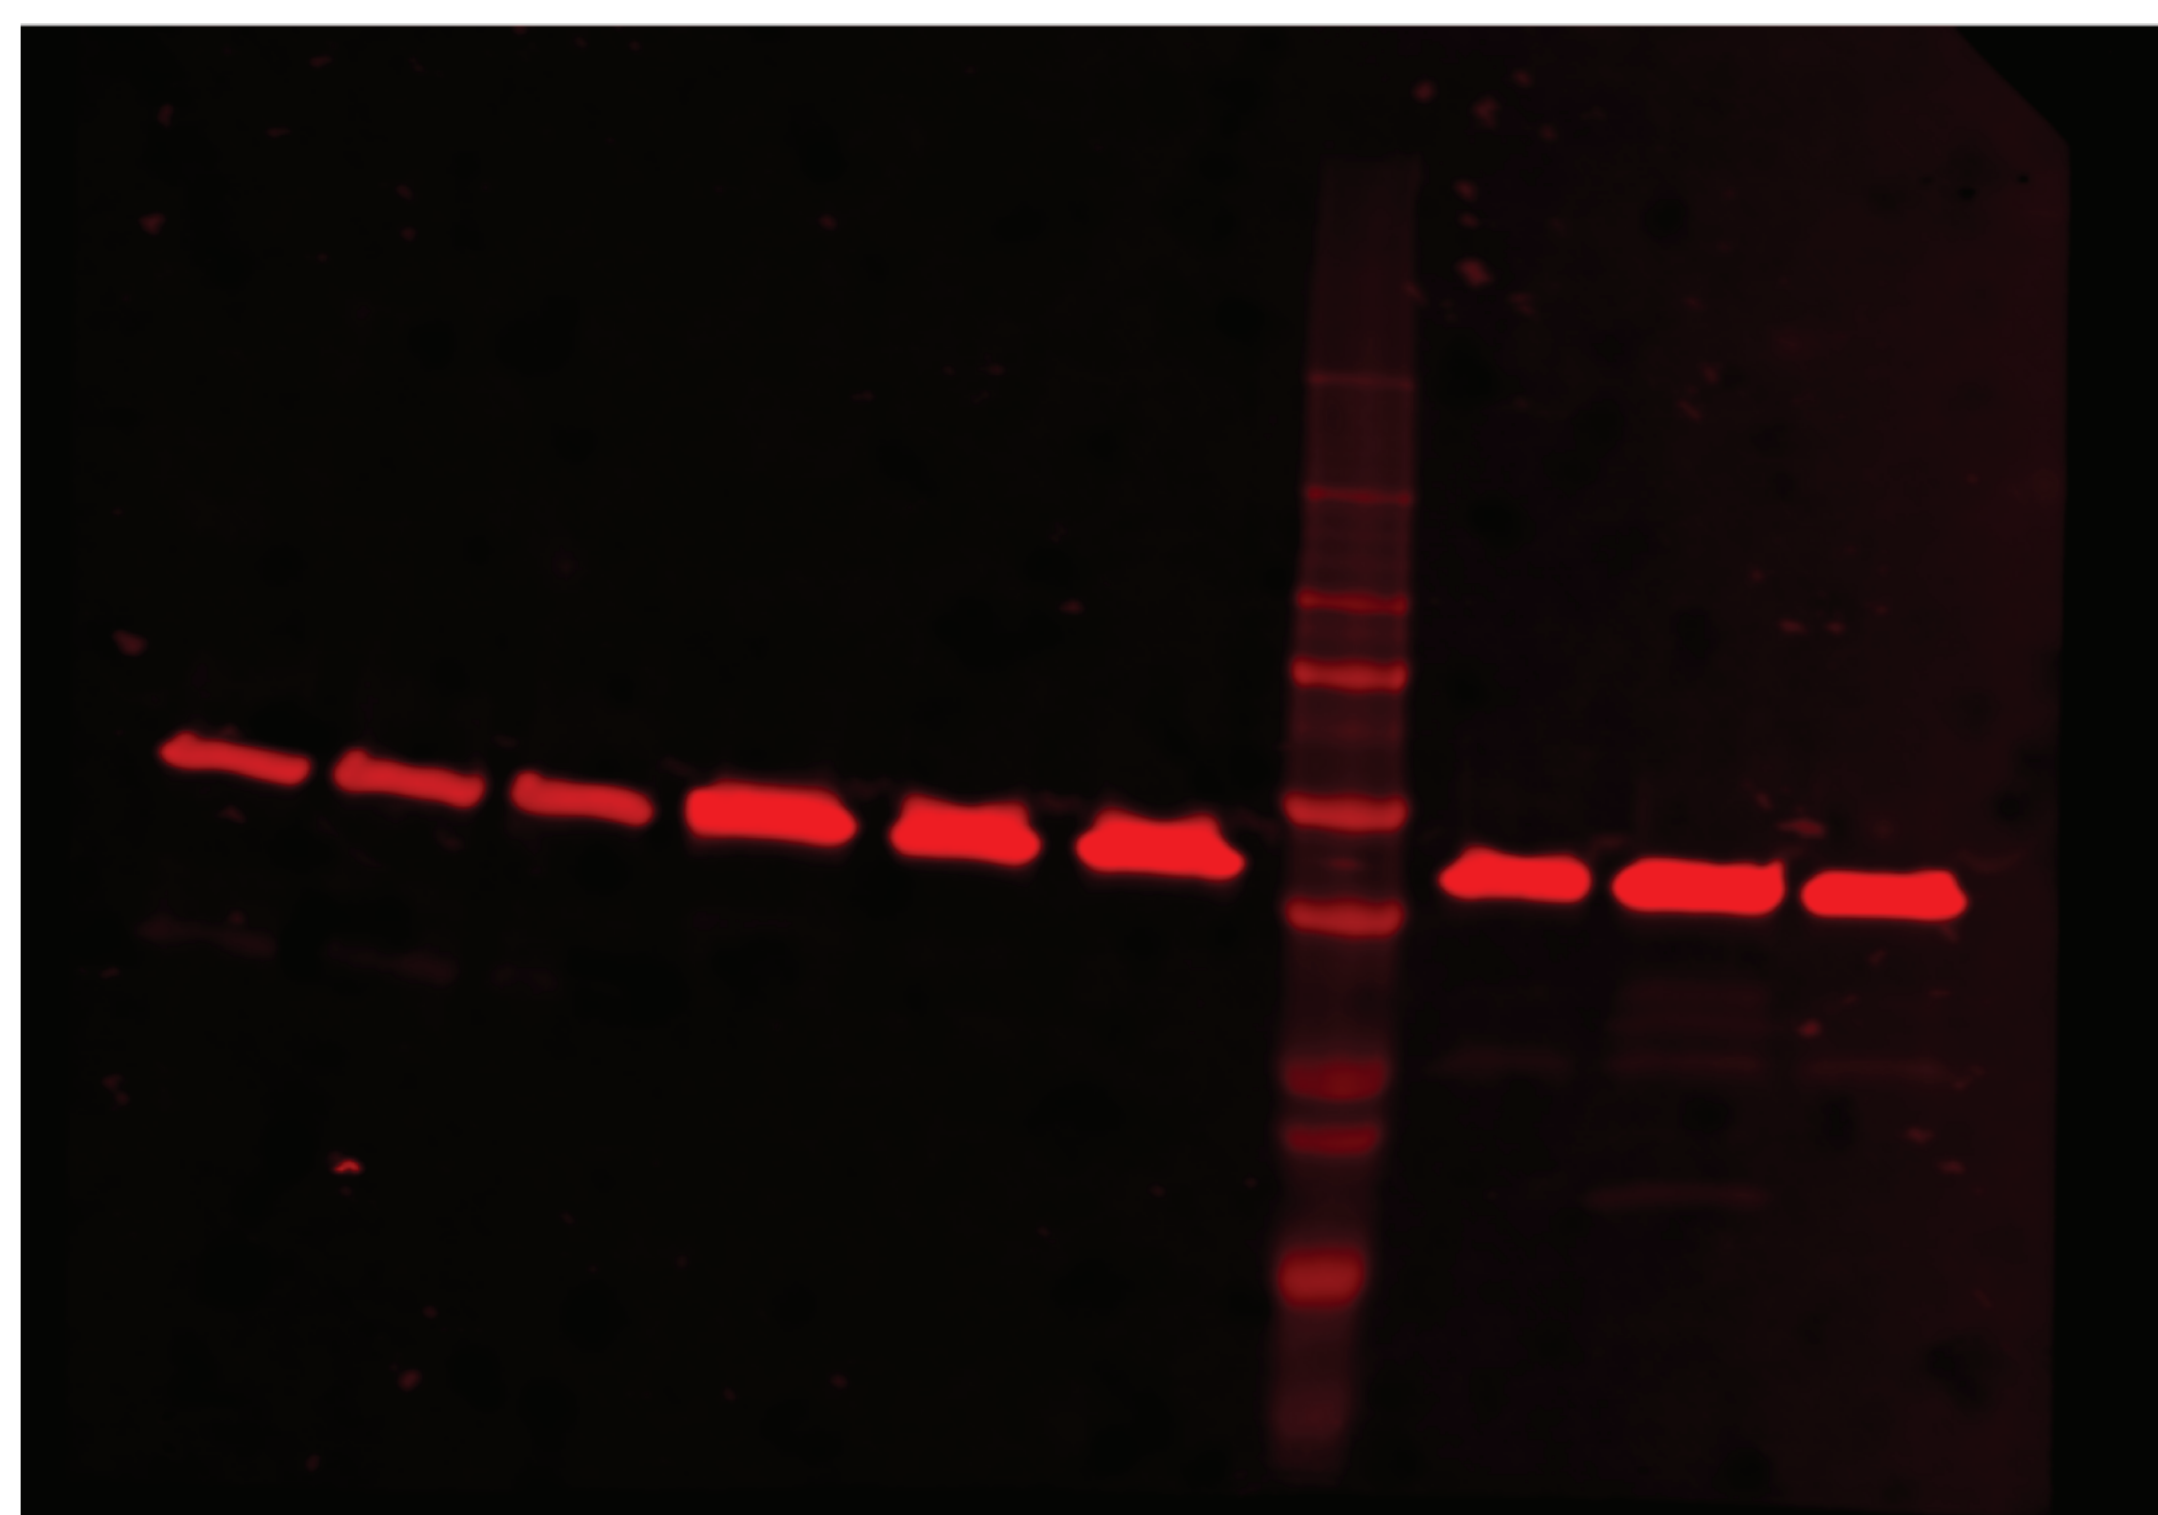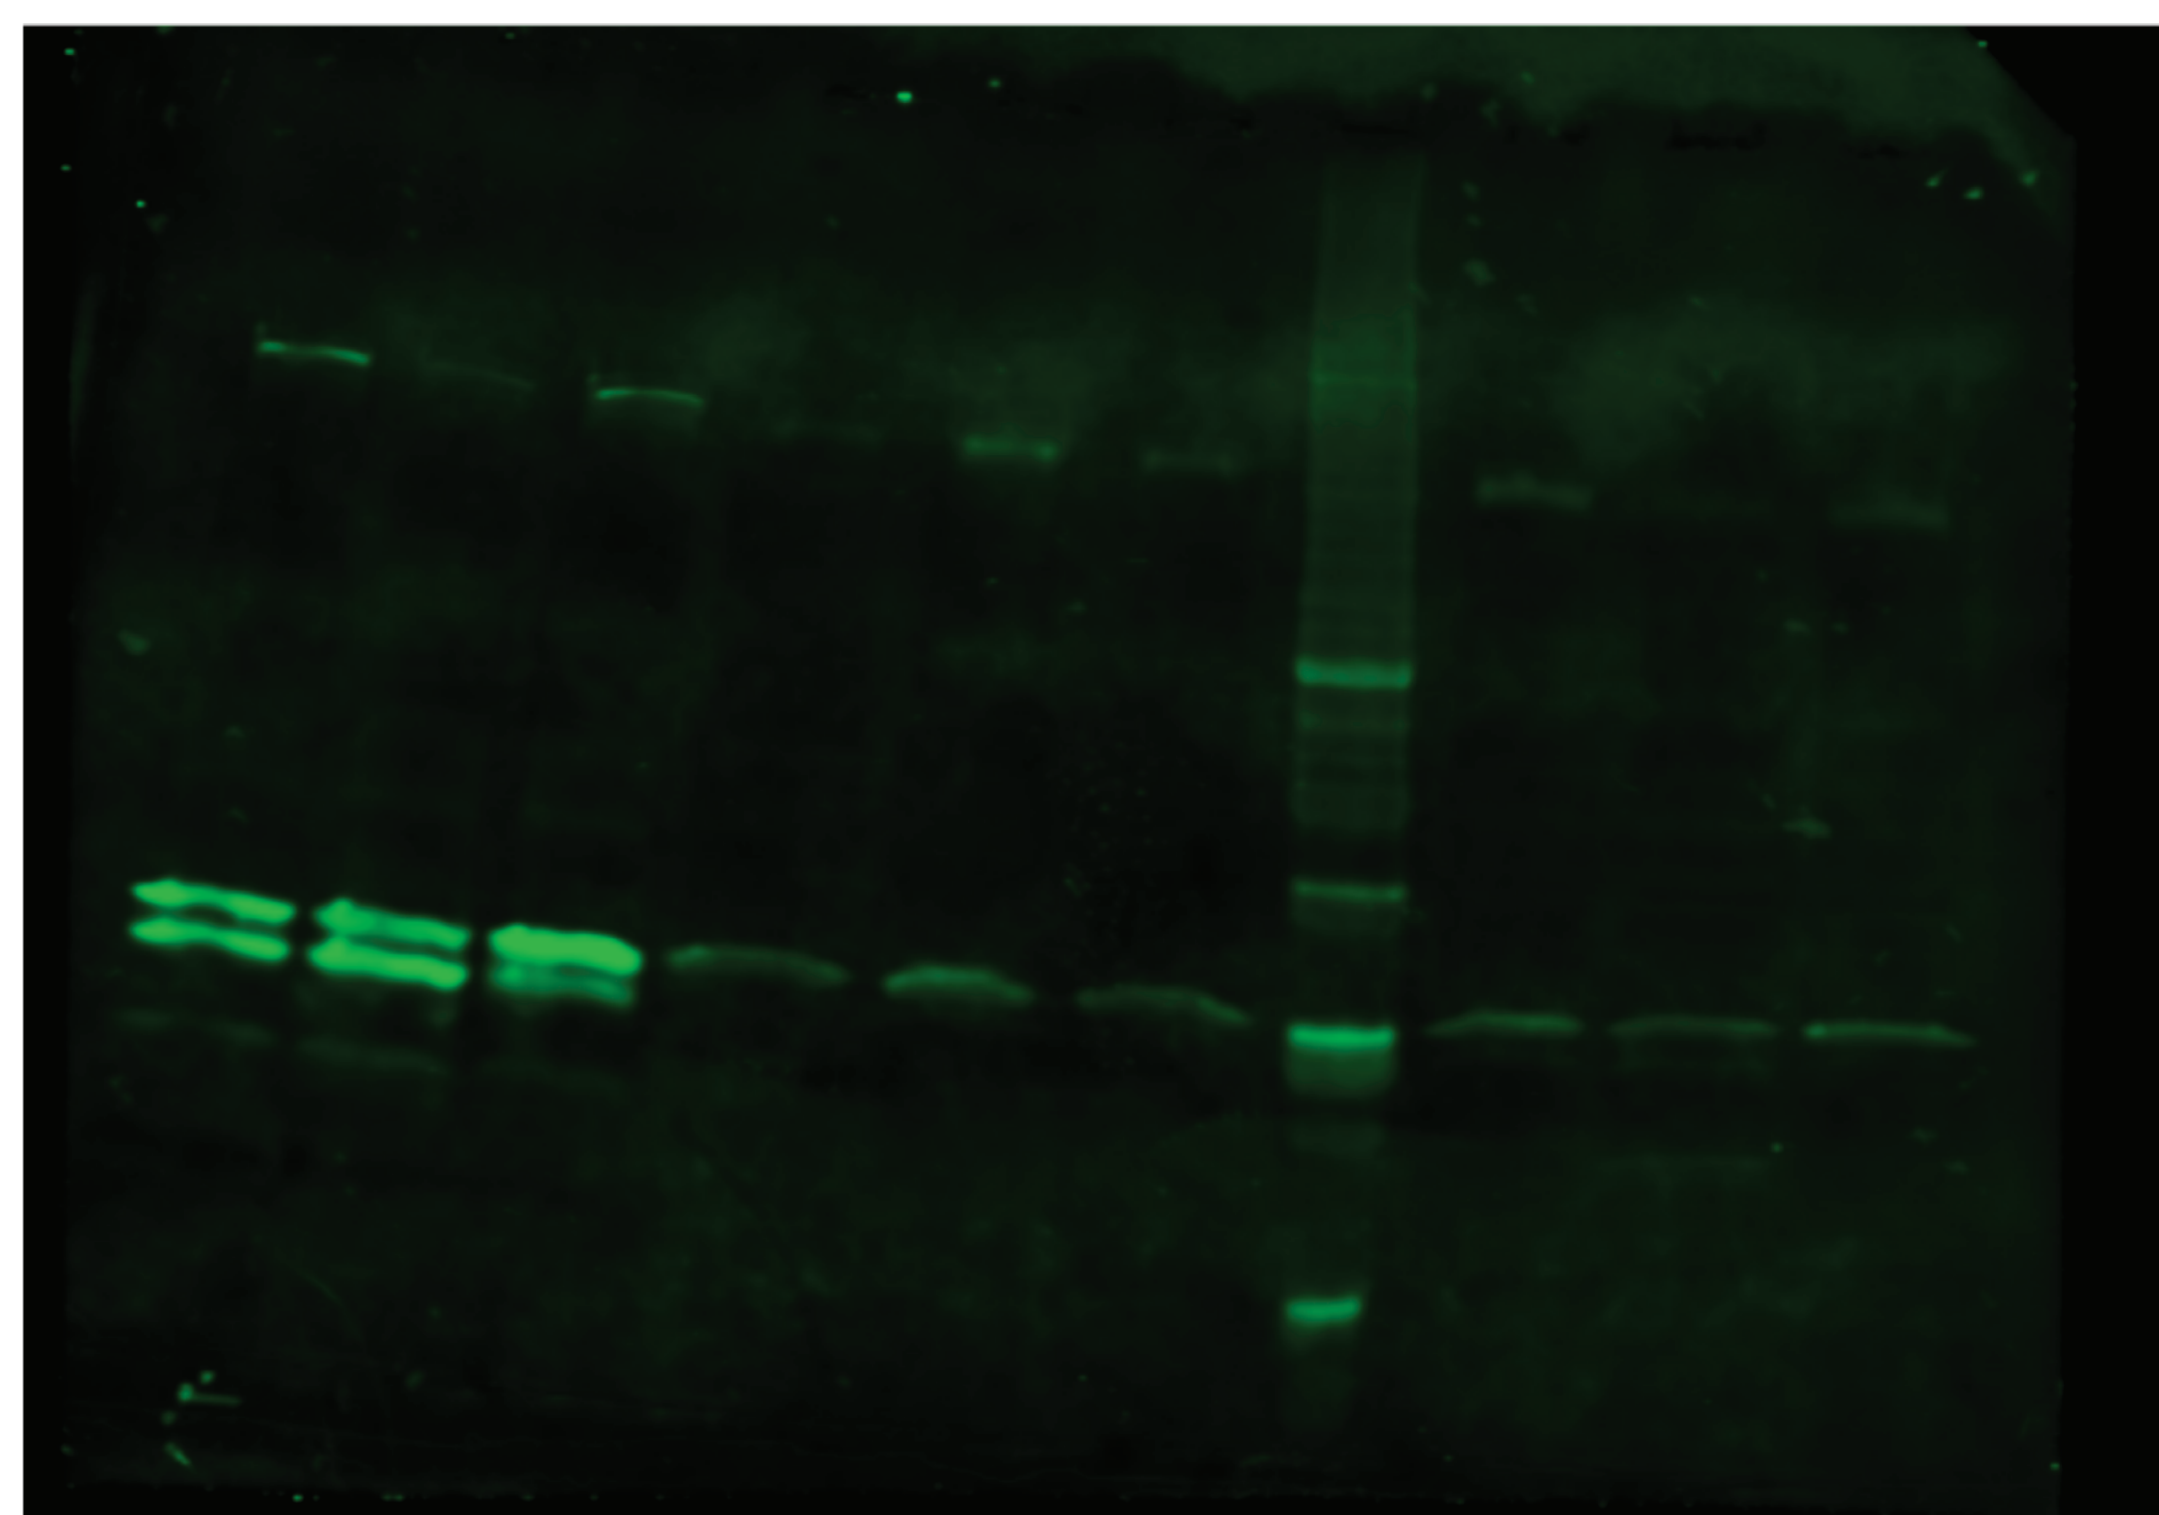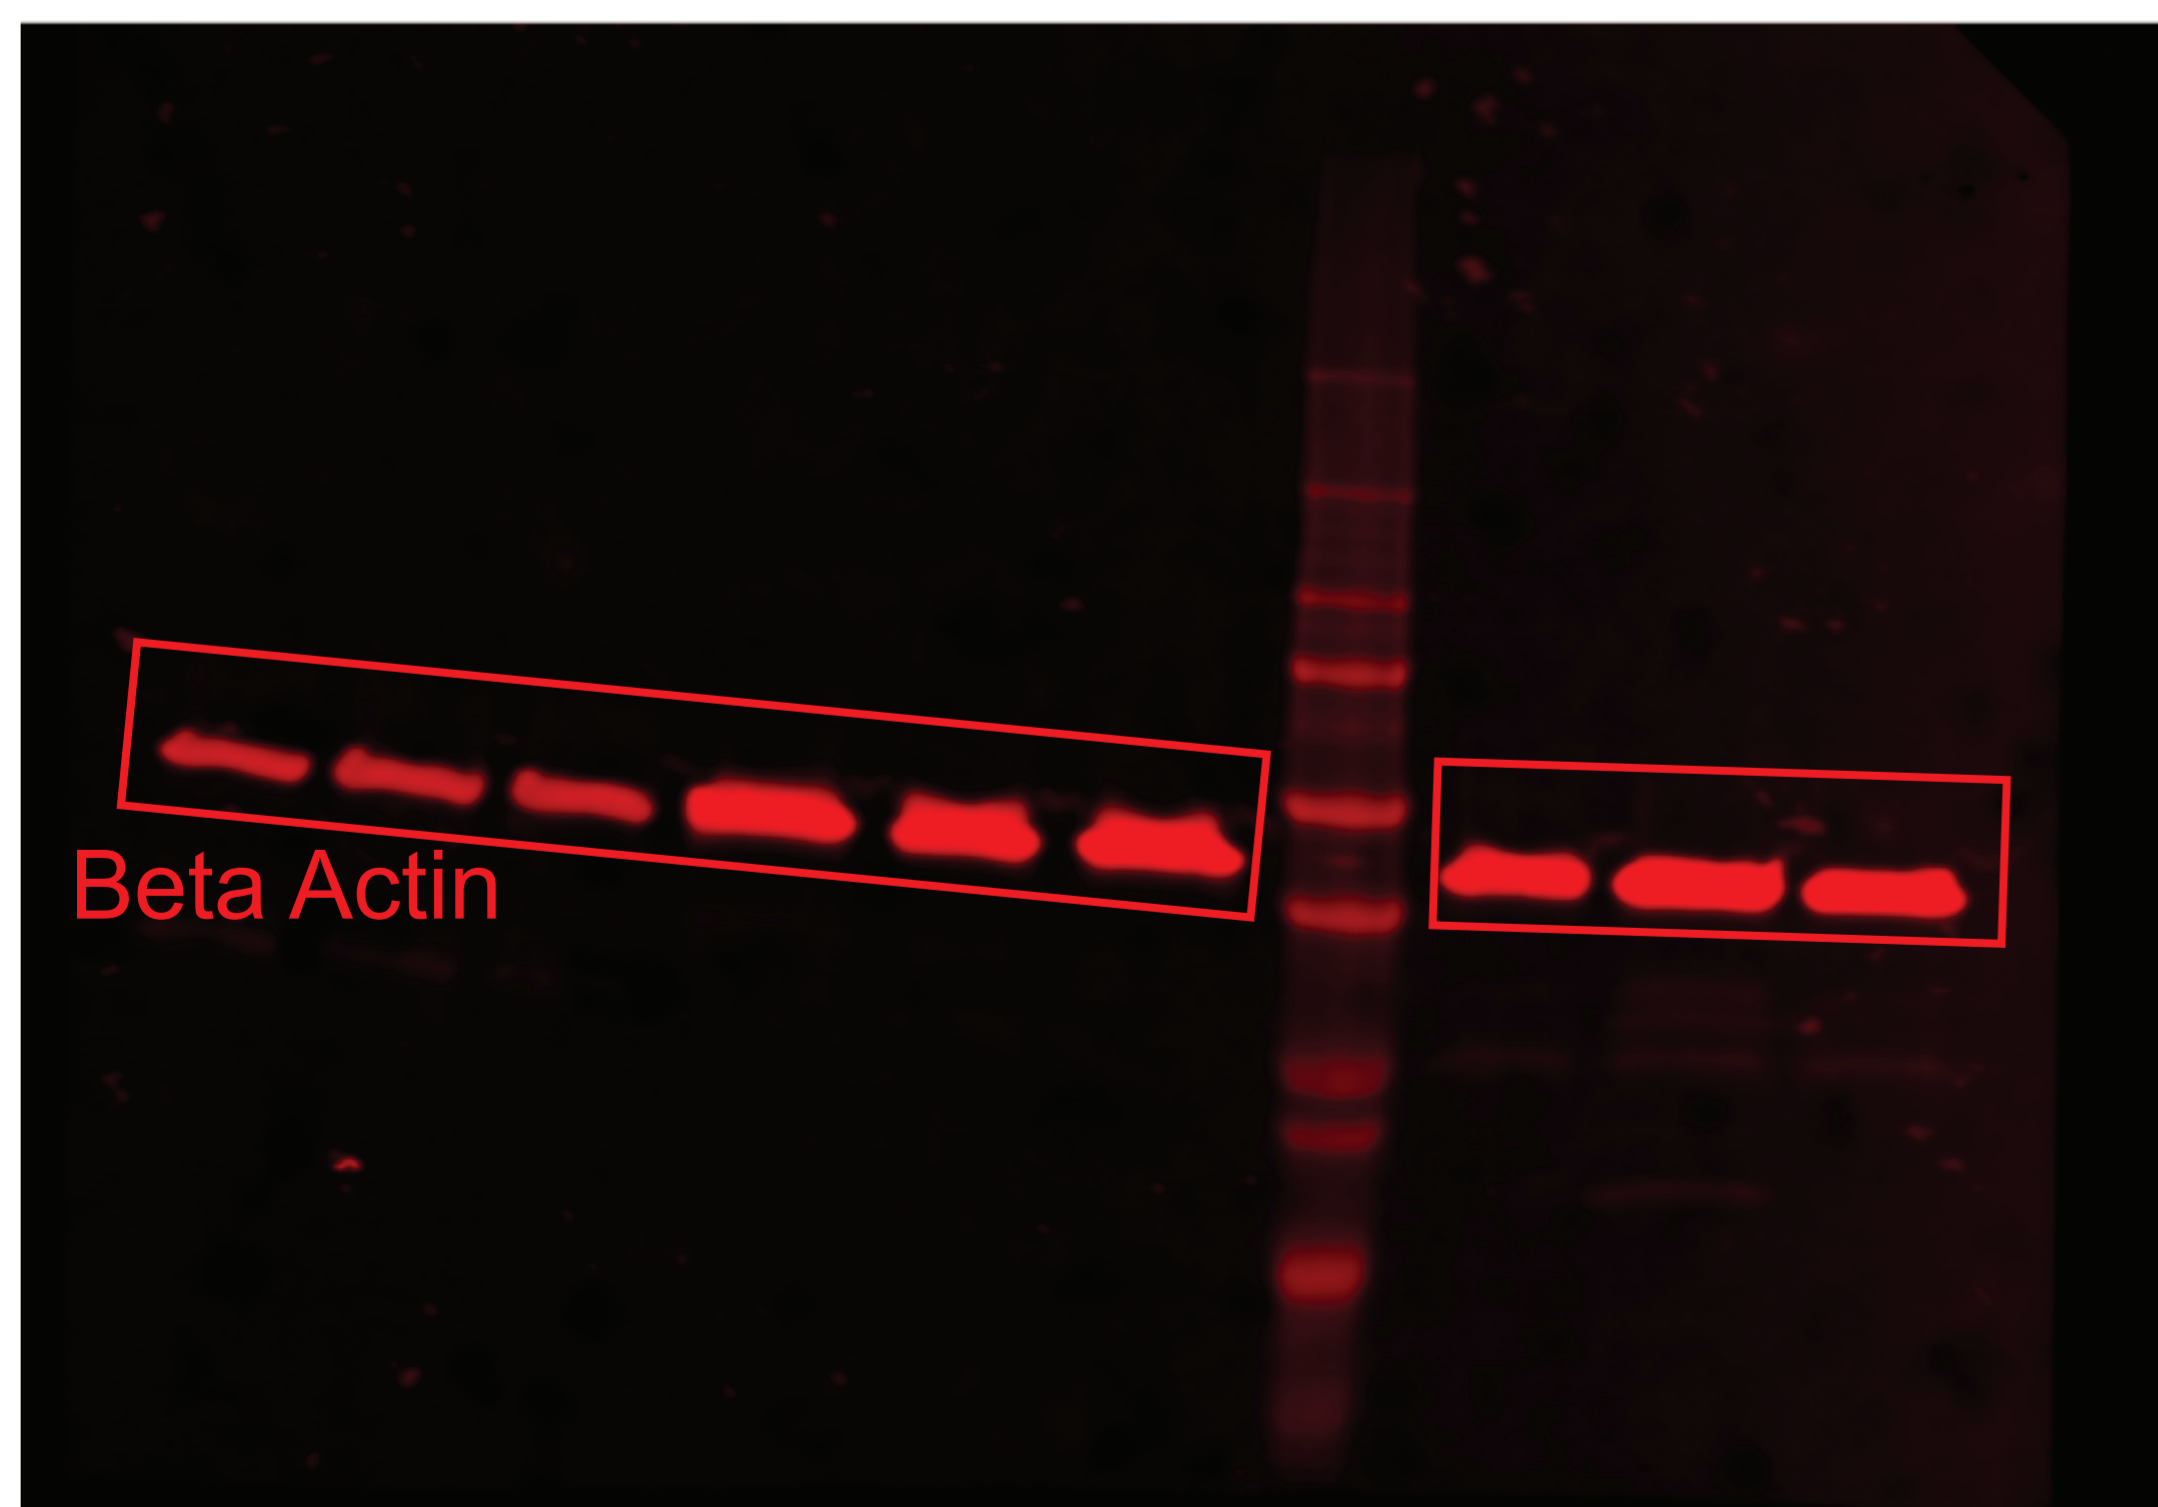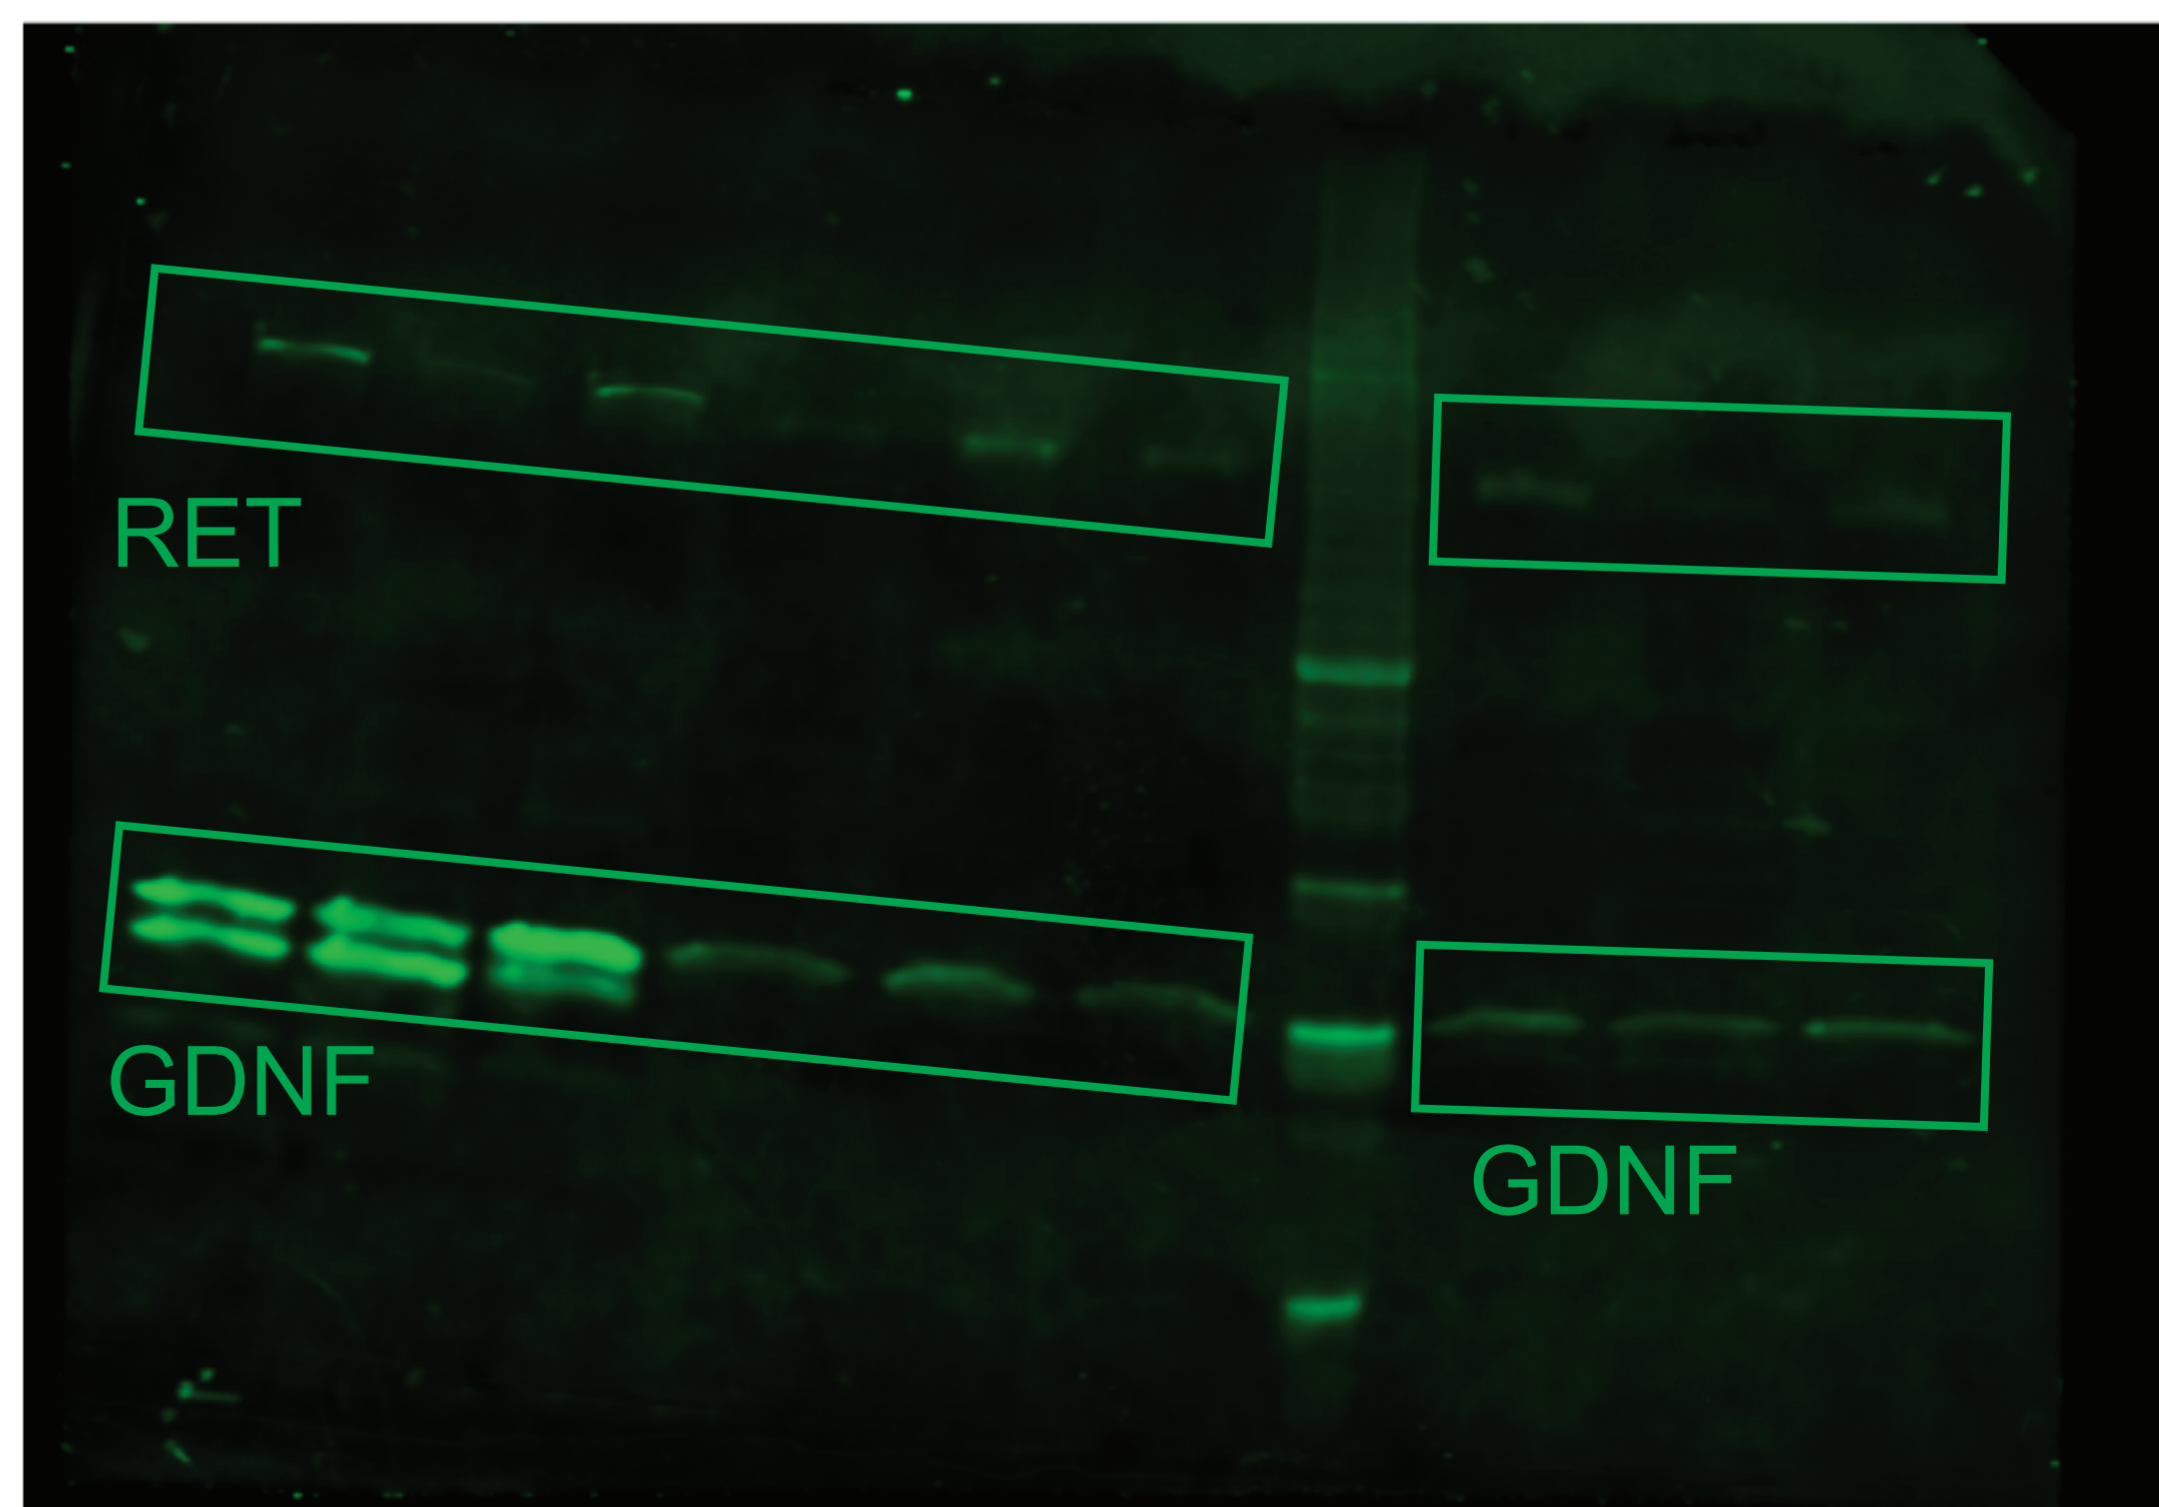

Supplement: fig10-data1 [file elife-88051-fig10-data1-v1.pdf]
