# Supplementary material for: Age-associated changes in lineage composition of the enteric nervous system regulate gut health and disease
Source: eLife. 2023 Dec 18;12:RP88051. doi: 10.7554/eLife.88051 (PMC10727506; doi:10.7554/eLife.88051)
Supplement: Figure 4—source data 1. — Highlighted genes between MENs clusters from our data and data from May-Zhang et al and from Drokhlyansky et al show similar gene expression profiles between the clusters. [file elife-88051-fig4-data1.pdf]

Figure 4-figure supplement 4

| Calcb+ cluster<br>corresponding to lleum<br>cluster in May-Zhang et al.<br>which expresses Calcb, Calb2,<br>Nmu, Fcdh10, Cysltr2 |             |               |  | Calcb+ cluster<br>corresponding to lleum<br>cluster in May-Zhang et al.<br>which expresses Calcb, Calb2,<br>Sst |           |               |  | MENs-like cluster<br>corresponding to lleum<br>cluster in May-Zhang et al.<br>which expresses Upk3b and<br>Igfbp6 |          |               |  | MENs Cluster (Our Data) |           |               |  | Cluster annotated as Mesothelial<br>(Drokhlyansky et al data) |             |               |  |
|----------------------------------------------------------------------------------------------------------------------------------|-------------|---------------|--|-----------------------------------------------------------------------------------------------------------------|-----------|---------------|--|-------------------------------------------------------------------------------------------------------------------|----------|---------------|--|-------------------------|-----------|---------------|--|---------------------------------------------------------------|-------------|---------------|--|
| Gene                                                                                                                             | FDR         | summary.logFC |  | Gene                                                                                                            | FDR       | summary.logFC |  | Gene                                                                                                              | FDR      | summary.logFC |  | Gene                    | FDR       | summary.logFC |  | Gene                                                          | FDR         | summary.logFC |  |
| Zfp804a                                                                                                                          | 0           | 5.314372906   |  | Nlgn1                                                                                                           | 1.56E-227 | 4.503778932   |  | Abi1                                                                                                              | 4.98E-36 | 3.316005072   |  | Bcam                    | 0         | 1.310889756   |  | Lrm4                                                          | 5.4657E-206 | 16.886354     |  |
| Pcdh10                                                                                                                           | 0           | 2.727131014   |  | Plkxa4                                                                                                          | 5.40E-170 | 3.513261638   |  | Dcn                                                                                                               | 2.08E-52 | 5.091738535   |  | Mgst1                   | 0         | 1.466554292   |  | Rspo1                                                         | 3.6499E-210 | 9.4753895     |  |
| Gpr149                                                                                                                           | 0           | 2.928565459   |  | Pcdh15                                                                                                          | 6.75E-269 | 4.552606891   |  | Col3a1                                                                                                            | 7.95E-31 | 3.039859427   |  | Krt18                   | 1.02E-252 | 0.722876212   |  | Wt1                                                           | 1.5809E-227 | 10.114356     |  |
| Necab1                                                                                                                           | 0           | 3.126115371   |  | Nrg3                                                                                                            | 9.23E-246 | 4.051012028   |  | C3                                                                                                                | 1.11E-38 | 4.827731701   |  | Igfbp6                  | 0         | 4.277079428   |  | Upk3b                                                         | 5.8625E-282 | 8.9449835     |  |
| Grin3a                                                                                                                           | 0           | 2.477871618   |  | Emi6                                                                                                            | 1.02E-166 | 3.739252675   |  | Slpi                                                                                                              | 2.75E-31 | 4.598725251   |  | Rspo1                   | 0         | 1.356888212   |  | Bnc1                                                          | 4.04195E-85 | 15.045354     |  |
| Fam19a1                                                                                                                          | 0           | 4.658451729   |  | Ryr2                                                                                                            | 4.15E-122 | 2.724692337   |  | Lrrm4                                                                                                             | 7.45E-21 | 2.797813295   |  | Gpm6a                   | 0         | 2.007236002   |  | Wt1os                                                         | 2.3697E-123 | 9.9661905     |  |
| Ano2                                                                                                                             | 0           | 3.443066822   |  | Nrxn3                                                                                                           | 1.20E-156 | 4.845162261   |  | S100a6                                                                                                            | 9.36E-29 | 3.230324987   |  | Upk3b                   | 0         | 2.136663175   |  | Upk1b                                                         | 1.277E-215  | 8.0787953     |  |
| Nltn3                                                                                                                            | 0           | 4.380099903   |  | Rbfox1                                                                                                          | 0.00E+00  | 4.833341666   |  | Upk3b                                                                                                             | 1.90E-26 | 3.101085936   |  | Aebp1                   | 0         | 2.502295384   |  | Aldh1a2                                                       | 1.5275E-143 | 6.3791433     |  |
| Cntn5                                                                                                                            | 0           | 6.308342607   |  | Sst                                                                                                             | 6.45E-135 | 5.862426929   |  | Gpm6a                                                                                                             | 1.13E-24 | 3.730157809   |  | Dcn                     | 0         | 4.082052904   |  | Msln                                                          | 8.3474E-159 | 7.3877455     |  |
| Ccbe1                                                                                                                            | 0           | 3.076522552   |  | Chsy3                                                                                                           | 4.53E-122 | 3.602794203   |  | Sparc                                                                                                             | 1.37E-28 | 3.316214748   |  | Slpi                    | 0         | 4.928306229   |  | Igfbp6                                                        | 1.7674E-307 | 7.7565747     |  |
| Zbtb7c                                                                                                                           | 0           | 2.656109043   |  | Gria2                                                                                                           | 3.32E-126 | 3.083755369   |  | Meg3                                                                                                              | 3.89E-23 | 2.952545493   |  | Rarres2                 | 0         | 4.202866323   |  | Lvrn                                                          | 4.18762E-92 | 7.8098721     |  |
| Astn2                                                                                                                            | 0           | 3.366649926   |  | Ptprd                                                                                                           | 3.17E-139 | 2.906173926   |  | Igfbp6                                                                                                            | 4.99E-26 | 3.61531349    |  | Etfemp1                 | 0         | 1.672848071   |  | C3                                                            | 0           | 8.057149      |  |
| Dapk2                                                                                                                            | 0           | 1.703870376   |  | Pde4b                                                                                                           | 3.69E-210 | 3.947198917   |  | Agap1                                                                                                             | 4.03E-21 | 2.507795342   |  | Aldh1a2                 | 4.60E-277 | 0.796263425   |  | Muc16                                                         | 7.8925E-269 | 7.3116341     |  |
| Nrxn3                                                                                                                            | 0           | 5.160806272   |  | Fam19a2                                                                                                         | 8.41E-100 | 3.227261386   |  | Pbx1                                                                                                              | 4.47E-25 | 2.530783608   |  | Fmo2                    | 0         | 1.582315372   |  | Gpm6a                                                         | 0           | 6.5940179     |  |
| Dgkg                                                                                                                             | 0           | 4.15397884    |  | Mdga2                                                                                                           | 2.01E-132 | 3.667573403   |  | Etfemp1                                                                                                           | 2.67E-22 | 2.915648257   |  | Upk1b                   | 0         | 1.081912196   |  | Cybrd1                                                        | 4.39858E-60 | 9.0017763     |  |
| Galr1                                                                                                                            | 0           | 1.673088209   |  | Shng11                                                                                                          | 6.24E-112 | 4.344115315   |  | Gas6                                                                                                              | 2.54E-20 | 2.742900314   |  | Gas1                    | 0         | 1.464482623   |  | Fam180a                                                       | 1.90191E-30 | 13.526186     |  |
| Nmu                                                                                                                              | 0           | 3.521779106   |  | Raly1                                                                                                           | 1.59E-128 | 3.809356707   |  | Muc16                                                                                                             | 2.43E-21 | 3.168081514   |  | Krt7                    | 0         | 1.315380677   |  | Myrl                                                          | 7.17228E-56 | 8.6635402     |  |
| Hspb8                                                                                                                            | 1.42E-236   | 1.244433448   |  | Bnc2                                                                                                            | 1.58E-137 | 3.131344621   |  | Gas1                                                                                                              | 2.13E-23 | 2.708510446   |  | Crip1                   | 0         | 4.56883561    |  | Aebp1                                                         | 4.5764E-247 | 6.6271763     |  |
| Ccn2                                                                                                                             | 0           | 4.163432355   |  | Robo1                                                                                                           | 8.43E-84  | 2.405353602   |  | Dpp4                                                                                                              | 4.03E-21 | 2.876742349   |  | Clio                    | 0         | 1.502811937   |  | Crnb                                                          | 2.91628E-52 | 7.3719161     |  |
| Tmeff2                                                                                                                           | 0           | 3.49539549    |  | Nrxn1                                                                                                           | 1.51E-150 | 4.662080188   |  | Cobl1                                                                                                             | 1.10E-20 | 2.231586143   |  | C3                      | 0         | 3.494711523   |  | Zdbf2                                                         | 3.25895E-75 | 7.0872463     |  |
| Myf1                                                                                                                             | 0           | 3.653772641   |  | Pcsk2                                                                                                           | 5.79E-169 | 3.258681935   |  | Rarres2                                                                                                           | 1.64E-20 | 3.226437143   |  | Dpp4                    | 1.12E-210 | 0.556370013   |  | Sulf5a1                                                       | 2.85305E-24 | 13.31773      |  |
| Calcb                                                                                                                            | 0           | 3.200679451   |  | Syn2                                                                                                            | 1.17E-132 | 3.619085064   |  | Myo1d                                                                                                             | 6.05E-21 | 2.158327438   |  | Lrm4                    | 1.58E-271 | 0.736486954   |  | Cfh                                                           | 4.6319E-250 | 5.7592104     |  |
| Cysltr2                                                                                                                          | 0           | 2.487957211   |  | Nltn3                                                                                                           | 1.05E-108 | 2.657539356   |  | Tbce                                                                                                              | 1.69E-12 | 3.139158995   |  | Nkain4                  | 0         | 1.298360281   |  | Wdr17                                                         | 3.1501E-282 | 6.6320991     |  |
| Clstn2                                                                                                                           | 0           | 2.655215539   |  | Scube1                                                                                                          | 1.03E-95  | 2.265338351   |  | Il6st                                                                                                             | 6.05E-21 | 2.339891442   |  | S100a6                  | 0         | 4.128650316   |  | Ildr2                                                         | 3.4601E-136 | 6.7198792     |  |
| Robo1                                                                                                                            | 1.98E-297   | 1.99606895    |  | Man2a1                                                                                                          | 9.20E-139 | 3.375536511   |  | Nfip                                                                                                              | 7.62E-23 | 2.57202827    |  | Krt19                   | 0         | 1.900927424   |  | Slpi                                                          | 1.7684E-135 | 8.8326894     |  |
| Hunk                                                                                                                             | 0           | 1.918886092   |  | Kcnn2                                                                                                           | 7.39E-85  | 2.418320757   |  | Crip1                                                                                                             | 7.17E-19 | 2.764477578   |  | Cfb                     | 8.74E-203 | 0.608707666   |  | Fmod                                                          | 2.27977E-40 | 8.7786829     |  |
| Shng11                                                                                                                           | 0           | 2.098574269   |  | Fam19a1                                                                                                         | 1.79E-147 | 3.622699285   |  | Sema5a                                                                                                            | 1.97E-19 | 2.852546212   |  | Gabarapl1               | 5.26E-250 | 0.709728921   |  | Cpxm1                                                         | 7.29311E-19 | 12.558464     |  |
| Aff2                                                                                                                             | 0           | 2.087576143   |  | Nell1                                                                                                           | 3.21E-100 | 2.793128177   |  | Fmo2                                                                                                              | 1.80E-18 | 3.253371192   |  | Lgals3                  | 0         | 1.260729291   |  | Ifi205                                                        | 2.62948E-18 | 12.864742     |  |
| Udrt7a                                                                                                                           | 3.38E-263   | 2.545208984   |  | Galtntf6                                                                                                        | 1.72E-109 | 3.815091788   |  | Ezr                                                                                                               | 2.84E-20 | 2.166036039   |  | Krt8                    | 1.39E-245 | 0.689105423   |  | A730046J19                                                    | 8.01459E-17 | 12.793582     |  |
| Pcdh9                                                                                                                            | 0           | 4.21629123    |  | Sgcd                                                                                                            | 5.24E-120 | 2.88253651    |  | Ahnak                                                                                                             | 6.05E-21 | 2.714253195   |  | Tmad5f1                 | 0         | 1.367716307   |  | Eyaa4                                                         | 4.5788E-136 | 6.8974953     |  |
| Htr3b                                                                                                                            | 0           | 1.553388667   |  | Pde4d                                                                                                           | 1.18E-97  | 2.285404689   |  | Bnc2                                                                                                              | 6.54E-20 | 3.061680372   |  | Slc39a8                 | 7.17E-197 | 0.489802511   |  | Nkain1                                                        | 1.08326E-83 | 5.7593624     |  |
| Scn11a                                                                                                                           | 0           | 1.908976823   |  | Slc8a1                                                                                                          | 3.28E-180 | 3.408953415   |  | Krt19                                                                                                             | 6.15E-20 | 2.380492921   |  | Sema3c                  | 2.63E-255 | 0.71554962    |  | Col8a2                                                        | 5.81471E-44 | 5.2884497     |  |
| Iggap2                                                                                                                           | 0           | 1.75599309    |  | Tcf4                                                                                                            | 1.52E-159 | 2.692805317   |  | Crim1                                                                                                             | 3.00E-20 | 2.434254471   |  | Pcolce                  | 0         | 1.823133603   |  | Zfp185                                                        | 1.12186E-43 | 7.3412329     |  |
| Rbfox1                                                                                                                           | 0           | 4.70241843    |  | Pak3                                                                                                            | 2.89E-91  | 2.580345128   |  | Pltxna4                                                                                                           | 2.07E-19 | 2.707560817   |  | Gsta4                   | 1.09E-226 | 0.62733526    |  | Dcn                                                           | 6.4597E-292 | 5.6187432     |  |
| Tcf7l2                                                                                                                           | 0           | 2.84136652    |  | Kcnn1a                                                                                                          | 1.27E-136 | 2.945051283   |  | Sxx6                                                                                                              | 3.93E-19 | 2.803585619   |  | Ezr                     | 0         | 1.019712533   |  | Gm20400                                                       | 7.4045E-135 | 7.0357895     |  |
| Tbx2                                                                                                                             | 0           | 1.871954414   |  | Adgrb3                                                                                                          | 5.63E-143 | 4.396153392   |  | Aebp1                                                                                                             | 1.57E-19 | 2.548178022   |  | Cldn15                  | 4.76E-291 | 0.798661223   |  | Gas1                                                          | 2.6756E-182 | 5.7763744     |  |
| Robo2                                                                                                                            | 0           | 4.088780154   |  | Unc5c                                                                                                           | 2.09E-114 | 3.291001111   |  | Cfh                                                                                                               | 9.08E-18 | 2.422456138   |  | Serpinb6b               | 2.66E-212 | 0.562587863   |  | Cdh3                                                          | 2.1841E-97  | 6.406251      |  |
| Kcnn2                                                                                                                            | 0           | 3.926721104   |  | Cpne4                                                                                                           | 4.42E-81  | 2.730862875   |  | Col1a1                                                                                                            | 2.72E-13 | 2.033502612   |  | Nblf1                   | 0         | 1.239754358   |  | Efnas                                                         | 1.6397E-264 | 4.7533052     |  |
| Srrm4                                                                                                                            | 2.23E-261   | 2.303709088   |  | Meg3                                                                                                            | 7.04E-124 | 4.308953415   |  | Wt1                                                                                                               | 2.03E-17 | 2.196826568   |  | Slc16a1                 | 2.28E-244 | 0.65901005    |  | Tmem151a                                                      | 4.7978E-88  | 6.2910937     |  |
| Pltxna4                                                                                                                          | 0           | 3.31892195    |  | Snap25                                                                                                          | 4.22E-135 | 3.917101813   |  | Ccdc171                                                                                                           | 1.09E-14 | 2.022034827   |  | Slim1                   | 2.76E-245 | 0.659125894   |  | Bnc2                                                          | 5.1982E-260 | 5.1760469     |  |
| Gsgz                                                                                                                             | 0           | 4.7359595343  |  | Syt1                                                                                                            | 7.05E-140 | 4.346683131   |  | Cd2ap                                                                                                             | 2.30E-18 | 2.290803108   |  | Shng18                  | 3.11E-181 | 0.475288967   |  | Gm12381                                                       | 7.0467E-102 | 7.6933315     |  |
| S030059O14                                                                                                                       | 0           | 3.600146025   |  | Grik4                                                                                                           | 8.53E-115 | 2.35016852    |  | Arhgap29                                                                                                          | 3.72E-18 | 2.409211927   |  | Cavin3                  | 6.15E-293 | 0.855731534   |  | Serpinb6b                                                     | 1.16024E-44 | 5.3575251     |  |
| Sex4                                                                                                                             | 7.89E-259   | 1.211156367   |  | Ptpn2                                                                                                           | 1.75E-15  | 3.282060606   |  | Ano1                                                                                                              | 2.38E-18 | 3.03970984    |  | Gpc3                    | 0         | 1.393181642   |  | Pltxna4                                                       | 1.3438E-213 | 5.1142124     |  |
| Hcn1                                                                                                                             | 8.400165280 | 1.861283774   |  | Arhgap26                                                                                                        | 1.46E-133 | 2.281300441   |  | Col1a2                                                                                                            | 5.02E-13 | 2.132928671   |  | Serpinb1a               | 3.54E-178 | 0.472277374   |  | Etfemp1                                                       | 6.3046E-195 | 5.3926198     |  |
| Scube1                                                                                                                           | 0           | 2.077291022   |  | Bcl2                                                                                                            | 1.53E-91  | 2.27434062    |  | Cav1                                                                                                              | 5.10E-18 | 2.235452113   |  | Chst4                   | 3.42E-232 | 0.598828027   |  | Gm765                                                         | 4.94209E-43 | 6.7967853     |  |
| Boc                                                                                                                              | 5.82E-199   | 0.854637195   |  | Ppm1h                                                                                                           | 6.46E-139 | 3.466729684   |  | Bicc1                                                                                                             | 2.27E-19 | 2.486459595   |  | Esam                    | 1.50E-188 | 0.47512383    |  | Fmo3                                                          | 1.17753E-20 | 8.4299998     |  |
| Cbln2                                                                                                                            | 0           | 2.29769856    |  | Fgf14                                                                                                           | 3.30E-126 | 4.330212767   |  | Msln                                                                                                              | 2.28E-14 | 1.829701191   |  | Ptgis                   | 5.59E-231 | 0.598750529   |  | Fmo2                                                          | 2.9871E-243 | 5.3187177     |  |
| Kcnn3                                                                                                                            | 0           | 1.899022338   |  | Gm12216                                                                                                         | 9.54E-78  | 1.937925878   |  | Dic1                                                                                                              | 1.57E-18 | 2.561801087   |  | Slc9a3r1                | 7.03E-265 | 0.883988091   |  | Prss12                                                        | 3.97653E-61 | 5.4000171     |  |
| Rph3a                                                                                                                            | 0           | 1.741082515   |  | Camk2a                                                                                                          | 1.73E-88  | 2.352765766   |  | Upk1b                                                                                                             | 1.96E-17 | 1.970013811   |  | Ecm1                    | 1.88E-172 | 0.514360839   |  | Vwa3a                                                         | 1.02294E-65 | 5.517216      |  |
| Cpne8                                                                                                                            | 0           | 2.360533782   |  | Sgll1                                                                                                           | 5.32E-123 | 3.932808506   |  | Igfbp7                                                                                                            | 3.39E-17 | 2.542517734   |  | Msln                    | 0         | 2.347561986   |  | Abcb1b                                                        | 1.7423E-115 | 6.470465      |  |
| Calcr1                                                                                                                           | 1.126952401 | 1.788279732   |  | Ppp3ca                                                                                                          | 1.96E-101 | 2.03501536    |  | Vim                                                                                                               | 1.68E-16 | 2.45290991    |  | Gpx3                    | 0         | 2.209730215   |  | Rarres2                                                       | 6.6617E-142 | 5.7715796     |  |
| Lingo2                                                                                                                           | 0           | 4.714175039   |  | Adamts3                                                                                                         | 1.24E-60  | 1.993937158   |  | Sema3c                                                                                                            | 1.17E-17 | 2.547300887   |  | Col14a1                 | 1.17E-163 | 0.423875564   |  | Lrp2                                                          | 2.01232E-42 | 6.2276692     |  |
| Slc4a4                                                                                                                           | 0           | 2.575716085   |  | Calcb                                                                                                           | 4.08E-76  | 2.288867891   |  | Ifitm3                                                                                                            | 6.57E-15 | 2.071790767   |  | Anxa1                   | 4.24E-246 | 0.691007825   |  | Cldn10                                                        | 6.74497E-17 | 5.6397899     |  |
| Cux2                                                                                                                             | 0           | 2.614397251   |  | Pcbp3                                                                                                           | 1.17E-136 | 3.893280923   |  | Rspo1                                                                                                             | 1.96E-17 | 1.964755911   |  | Bace2                   | 7.94E-223 | 0.603024779   |  | Spock2                                                        | 1.9494E-138 | 5.1124954     |  |
| Chat                                                                                                                             | 1.62E-252   | 1.075493057   |  | Dlgap2                                                                                                          | 1.21E-96  | 2.470978745   |  | Aldh1a2                                                                                                           | 4.16E-15 | 2.160694165   |  | Cfh                     | 0         | 1.190621234   |  | Chrd                                                          | 1.6918E-22  | 7.4139259     |  |
| Htr3a                                                                                                                            | 0           | 1.82434275    |  | Nkain2                                                                                                          | 1.01E-107 | 2.706721609   |  | Serpin1                                                                                                           | 4.91E-14 | 2.101997058   |  | Tmem176a                | 1.85E-170 | 0.915766916   |  | Ltbp3                                                         | 1.94368E-88 | 5.07873       |  |
| Hs3st2                                                                                                                           | 1.183691861 | 1.564650584   |  | Chat                                                                                                            | 2.41E-66  | 1.619335139   |  | Tim2                                                                                                              | 8.53E-10 | 1.596556868   |  | Tmsb10                  | 0         | 2.299200297   |  | Pkhd11i                                                       | 4.889E-120  | 4.4235079     |  |
| Cdh8                                                                                                                             | 0.00E+00    | 2.544193879   |  | Gfra2                                                                                                           | 4.04E-106 | 2.679843878   |  | Sdc4                                                                                                              | 9.94E-13 | 1.640281568   |  | Tim2                    | 0         | 1.918063461   |  | Svop1                                                         | 4.52096E-42 | 6.0169611     |  |
| Gm45881                                                                                                                          | 0           | 2.045509731   |  | Pde10a                                                                                                          | 7.37E-115 | 2.924056301   |  | Cd34                                                                                                              | 2.04E-10 | 1.324668078   |  | Serpinh1                | 2.72E-11  | 1.617681506   |  | Ptgis                                                         | 1.487E-109  | 5.0355517     |  |
| Cdh6</                                                                                                                           |             |               |  |                                                                                                                 |           |               |  |                                                                                                                   |          |               |  |                         |           |               |  |                                                               |             |               |  |
