# Supplementary material for: Age-associated changes in lineage composition of the enteric nervous system regulate gut health and disease
Source: eLife. 2023 Dec 18;12:RP88051. doi: 10.7554/eLife.88051 (PMC10727506; doi:10.7554/eLife.88051)
Supplement: Supplementary file 2. [file elife-88051-supp2.xlsx]

## Sheet: Legend
Supplementary File 2: Cluster-specific transcripts for the various clusters identified in the scRNAseq analyses of the P21 and the 6 month LMMP datasets

## Sheet: 6 month data
	cell_type	cell_group	gene_id	gene_short_name	marker_score	mean_expression	fraction_expressing	specificity	pseudo_R2	marker_test_p_value	marker_test_q_value
1	Macrophage-A	1	ENSMUSG00000003429	Rps11	0.061355	3.18161	0.63879	0.0960487	0.0246524	4.96328e-40	2.37579e-34
2	Macrophage-A	1	ENSMUSG00000021939	Ctsb	0.0610561	2.03898	0.480427	0.127087	0.00269214	1.29526e-05	1
3	Macrophage-A	1	ENSMUSG00000006333	Rps9	0.0655632	3.4206	0.660587	0.0992498	0.0318136	2.91556e-51	1.3956e-45
4	Macrophage-A	1	ENSMUSG00000007892	Rplp1	0.0863225	4.80694	0.771352	0.111911	0.0497513	1.39463e-79	6.67573e-74
5	Macrophage-A	1	ENSMUSG00000021242	Npc2	0.0578658	1.35188	0.387011	0.14952	0.00996366	4.494e-17	2.15116e-11
6	Macrophage-A	1	ENSMUSG00000022108	Itm2b	0.0839677	4.99007	0.7371	0.113916	0.00538904	6.71677e-10	0.000321514
7	Macrophage-A	1	ENSMUSG00000024397	Aif1	0.14855	2.1368	0.50089	0.296571	0.172998	3.08989e-283	1.47905e-277
8	Macrophage-A	1	ENSMUSG00000024608	Rps14	0.0647039	4.58015	0.743772	0.0869942	0.014957	7.11338e-25	3.40499e-19
9	Macrophage-A	1	ENSMUSG00000024661	Fth1	0.143079	15.7652	0.969751	0.147542	0.178175	3.56837e-292	1.70808e-286
10	Macrophage-A	1	ENSMUSG00000027447	Cst3	0.121008	8.04315	0.8621	0.140364	0.103716	1.0742e-166	5.14193e-161
11	Macrophage-A	1	ENSMUSG00000029373	Pf4	0.117174	3.7833	0.591637	0.19805	0.193077	4.41273743451818e-318	2.11226267873055e-312
12	Macrophage-A	1	ENSMUSG00000030579	Tyrobp	0.124438	3.13548	0.639235	0.194667	0.221959	0	0
13	Macrophage-A	1	ENSMUSG00000031320	Rps4x	0.0616806	3.27123	0.640569	0.0962903	0.0154014	1.43913e-25	6.88872e-20
14	Macrophage-A	1	ENSMUSG00000032554	Trf	0.0598816	1.37229	0.373221	0.160446	0.0143355	6.64737e-24	3.18192e-18
15	Macrophage-A	1	ENSMUSG00000034892	Rps29	0.10832	7.6181	0.862544	0.125582	0.164378	1.97354e-268	9.4468e-263
16	Macrophage-A	1	ENSMUSG00000036594	H2-Aa	0.150412	10.5872	0.870107	0.172866	0.285863	0	0
17	Macrophage-A	1	ENSMUSG00000073421	H2-Ab1	0.135366	11.3845	0.86121	0.157181	0.234349	0	0
18	Macrophage-A	1	ENSMUSG00000038274	Fau	0.0758626	3.14722	0.659698	0.114996	0.0720324	3.47523e-115	1.6635e-109
19	Macrophage-A	1	ENSMUSG00000036887	C1qa	0.156059	6.723	0.808274	0.193077	0.258153	0	0
20	Macrophage-A	1	ENSMUSG00000036896	C1qc	0.11935	4.07605	0.682829	0.174788	0.17104	7.25492e-280	3.47274e-274
21	Macrophage-A	1	ENSMUSG00000036905	C1qb	0.153941	6.16533	0.799377	0.192576	0.261329	0	0
22	Macrophage-A	1	ENSMUSG00000024610	Cd74	0.184069	43.5288	0.980872	0.187658	0.402879	0	0
23	Macrophage-A	1	ENSMUSG00000045128	Rpl18a	0.0633174	3.89734	0.704181	0.0899163	0.0231843	9.8575e-38	4.71853e-32
24	Macrophage-A	1	ENSMUSG00000079017	Ifi27l2a	0.0761583	2.36508	0.503114	0.151374	0.00441408	2.32955e-08	0.0111509
25	Macrophage-A	1	ENSMUSG00000046330	Rpl37a	0.078168	6.14945	0.820285	0.0952937	0.0456018	5.26752e-73	2.52142e-67
26	Macrophage-A	1	ENSMUSG00000062006	Rpl34	0.0584578	2.62515	0.590302	0.0990302	0.0120435	2.52473e-20	1.20852e-14
27	Macrophage-A	1	ENSMUSG00000060938	Rpl26	0.0619608	2.80566	0.614324	0.10086	0.0120362	2.59188e-20	1.24067e-14
28	Macrophage-A	1	ENSMUSG00000060586	H2-Eb1	0.171194	11.7169	0.904359	0.189298	0.335149	0	0
29	Macrophage-A	1	ENSMUSG00000057322	Rpl38	0.0585048	2.84801	0.616548	0.0948909	0.00804922	4.45382e-14	2.13193e-08
30	Macrophage-A	1	ENSMUSG00000060636	Rpl35a	0.0777838	3.58849	0.708185	0.109835	0.0461633	6.80126e-74	3.25559e-68
31	Macrophage-A	1	ENSMUSG00000058715	Fcer1g	0.15131	4.22342	0.711299	0.212723	0.250886	0	0
32	Macrophage-A	1	ENSMUSG00000009927	Rps25	0.0593873	2.19122	0.550712	0.107837	0.0120694	2.30018e-20	1.10103e-14
33	Macrophage-A	1	ENSMUSG00000062997	Rpl35	0.059566	2.8609	0.62589	0.0951701	0.00889497	2.11073e-15	1.01035e-09
34	Macrophage-A	1	ENSMUSG00000057841	Rpl32	0.0643909	3.94728	0.693505	0.0928484	0.0271144	6.89892e-44	3.30234e-38
35	Macrophage-A	1	ENSMUSG00000064339	mt-Rnr2	0.0986652	9.36516	0.875445	0.112703	0.0163664	4.47766e-27	2.14334e-21
36	Macrophage-A	1	ENSMUSG00000064341	mt-Nd1	0.108845	20.1238	0.989324	0.110019	0.126005	1.38241e-203	6.61726e-198
37	Macrophage-A	1	ENSMUSG00000064345	mt-Nd2	0.092335	5.21006	0.798488	0.115637	0.0240798	3.91007e-39	1.87165e-33
38	Macrophage-A	1	ENSMUSG00000064357	mt-Atp6	0.0691857	3.05895	0.613879	0.112703	0.0212754	9.5482e-35	4.57048e-29
39	Macrophage-A	1	ENSMUSG00000064358	mt-Co3	0.088653	4.85035	0.775356	0.114339	0.0635913	1.2229e-101	5.8537e-96
40	Macrophage-A	1	ENSMUSG00000064363	mt-Nd4	0.111395	12.1486	0.957295	0.116364	0.100856	5.30272e-162	2.53827e-156
41	Macrophage-A	1	ENSMUSG00000064370	mt-Cytb	0.109912	23.4717	0.995552	0.110403	0.146476	5.7788e-238	2.76616e-232
42	Macrophage-A	1	ENSMUSG00000025508	Rplp2	0.0579794	2.71475	0.619662	0.0935661	0.0126598	2.7515e-21	1.31707e-15
43	Macrophage-A	1	ENSMUSG00000069516	Lyz2	0.0941956	10.04	0.844306	0.111566	0.297183	0	0
44	Macrophage-A	1	ENSMUSG00000050708	Ftl1	0.170055	16.8931	0.968416	0.175601	0.374005	0	0
45	Macrophage-A	1	ENSMUSG00000073412	Lst1	0.101379	1.18119	0.351423	0.28848	0.0833753	1.66875e-133	7.98787e-128
46	Macrophage-A	1	ENSMUSG00000029580	Actb	0.0813407	14.0604	0.816726	0.0995937	0.0300249	1.87757e-48	8.98743e-43
47	Macrophage-A	1	ENSMUSG00000049775	Tmsb4x	0.160431	37.1614	0.993772	0.161436	0.520989	0	0
48	Macrophage-A	1	ENSMUSG00000025290	Rps24	0.0584508	3.01558	0.629004	0.0929261	0.0171999	2.2339e-28	1.06931e-22
49	Macrophage-A	1	ENSMUSG00000079641	Rpl39	0.0636962	3.50557	0.667705	0.0953957	0.0157364	4.31406e-26	2.06503e-20
50	Macrophage-A	1	ENSMUSG00000093674	Rpl41	0.0668525	5.11097	0.79137	0.0844769	0.00351792	6.17322e-07	0.295496
51	Penk+ Fibroblasts	10	ENSMUSG00000000753	Serpinf1	0.281869	0.637152	0.584158	0.482521	0.178099	1.25169e-44	5.99153e-39
52	Penk+ Fibroblasts	10	ENSMUSG00000001119	Col6a1	0.248476	1.39169	0.772277	0.321745	0.191557	6.72151e-48	3.21741e-42
53	Penk+ Fibroblasts	10	ENSMUSG00000020241	Col6a2	0.216901	0.78443	0.663366	0.32697	0.174085	1.18088e-43	5.65255e-38
54	Penk+ Fibroblasts	10	ENSMUSG00000001506	Col1a1	0.308236	2.09792	0.821782	0.375083	0.273534	6.80644e-68	3.25807e-62
55	Penk+ Fibroblasts	10	ENSMUSG00000003477	Inmt	0.393969	0.702436	0.425743	0.92537	0.333309	1.45453e-82	6.96248e-77
56	Penk+ Fibroblasts	10	ENSMUSG00000058135	Gstm1	0.206196	1.5956	0.752475	0.274023	0.139518	2.8503e-35	1.36436e-29
57	Penk+ Fibroblasts	10	ENSMUSG00000005397	Nid1	0.349665	1.30108	0.752475	0.464687	0.284598	1.32924e-70	6.36272e-65
58	Penk+ Fibroblasts	10	ENSMUSG00000015354	Pcolce2	0.540784	0.657905	0.60396	0.895397	0.460261	5.35942e-114	2.56541e-108
59	Penk+ Fibroblasts	10	ENSMUSG00000017493	Igfbp4	0.215026	1.74333	0.762376	0.282048	0.121631	6.10931e-31	2.92437e-25
60	Penk+ Fibroblasts	10	ENSMUSG00000020363	Gfpt2	0.301844	0.419961	0.445545	0.677471	0.190686	1.09444e-47	5.23882e-42
61	Penk+ Fibroblasts	10	ENSMUSG00000020810	Cygb	0.304454	1.26094	0.742574	0.409998	0.281947	5.93057e-70	2.83881e-64
62	Penk+ Fibroblasts	10	ENSMUSG00000021047	Nova1	0.236825	0.297394	0.376238	0.629457	0.136372	1.6472e-34	7.88472e-29
63	Penk+ Fibroblasts	10	ENSMUSG00000021186	Fbln5	0.205177	0.636643	0.574257	0.357292	0.152386	2.1696e-38	1.03853e-32
64	Penk+ Fibroblasts	10	ENSMUSG00000021876	Rnase4	0.2237	1.31546	0.772277	0.289663	0.11215	1.2035e-28	5.76084e-23
65	Penk+ Fibroblasts	10	ENSMUSG00000022032	Scara5	0.567938	0.576575	0.633663	0.896277	0.507906	6.77972e-126	3.24527e-120
66	Penk+ Fibroblasts	10	ENSMUSG00000022371	Col14a1	0.318301	0.838001	0.613861	0.518523	0.161002	1.76638e-40	8.45521e-35
67	Penk+ Fibroblasts	10	ENSMUSG00000075602	Ly6a	0.225719	2.06743	0.762376	0.296074	0.186037	1.47618e-46	7.06609e-41
68	Penk+ Fibroblasts	10	ENSMUSG00000022894	Adamts5	0.230788	0.523392	0.445545	0.517991	0.176155	3.71202e-44	1.77685e-38
69	Penk+ Fibroblasts	10	ENSMUSG00000023224	Serping1	0.201259	2.36381	0.821782	0.244905	0.13795	6.83324e-35	3.27089e-29
70	Penk+ Fibroblasts	10	ENSMUSG00000024076	Vit	0.307464	0.355796	0.425743	0.722182	0.299925	2.32109e-74	1.11104e-68
71	Penk+ Fibroblasts	10	ENSMUSG00000025784	Clec3b	0.511313	3.96065	0.851485	0.600496	0.55553	7.61228e-138	3.6438e-132
72	Penk+ Fibroblasts	10	ENSMUSG00000026478	Lamc1	0.266533	0.664596	0.653465	0.407876	0.191343	7.58017e-48	3.62843e-42
73	Penk+ Fibroblasts	10	ENSMUSG00000026674	Ddr2	0.243374	0.567747	0.544554	0.446923	0.142579	5.16713e-36	2.47337e-30
74	Penk+ Fibroblasts	10	ENSMUSG00000026879	Gsn	0.662759	40.7407	1	0.662759	0.85469	2.94063e-214	1.4076e-208
75	Penk+ Fibroblasts	10	ENSMUSG00000027204	Fbn1	0.419277	1.62025	0.643564	0.651491	0.33889	6.14663e-84	2.94223e-78
76	Penk+ Fibroblasts	10	ENSMUSG00000029061	Mmp23	0.201315	0.329833	0.485149	0.414956	0.170437	9.07017e-43	4.34165e-37
77	Penk+ Fibroblasts	10	ENSMUSG00000029661	Col1a2	0.352094	2.69046	0.861386	0.408752	0.340976	1.88344e-84	9.01552e-79
78	Penk+ Fibroblasts	10	ENSMUSG00000030116	Mfap5	0.545694	1.90351	0.762376	0.715781	0.468398	5.02549e-116	2.40557e-110
79	Penk+ Fibroblasts	10	ENSMUSG00000064080	Fbln2	0.293454	0.978131	0.683168	0.429549	0.183415	6.40064e-46	3.06382e-40
80	Penk+ Fibroblasts	10	ENSMUSG00000039405	Prss23	0.222049	1.37539	0.742574	0.299026	0.145367	1.09033e-36	5.21914e-31
81	Penk+ Fibroblasts	10	ENSMUSG00000034463	Scara3	0.244761	0.145923	0.287129	0.852442	0.179583	5.45759e-45	2.61241e-39
82	Penk+ Fibroblasts	10	ENSMUSG00000028369	Svep1	0.1993	0.379025	0.425743	0.468124	0.154497	6.67511e-39	3.1952e-33
83	Penk+ Fibroblasts	10	ENSMUSG00000054203	Ifi205	0.230358	0.310771	0.405941	0.567468	0.214251	2.02323e-53	9.68468e-48
84	Penk+ Fibroblasts	10	ENSMUSG00000022665	Ccdc80	0.241051	0.706739	0.584158	0.412647	0.17323	1.90457e-43	9.11668e-38
85	Penk+ Fibroblasts	10	ENSMUSG00000032334	Loxl1	0.290317	0.575513	0.584158	0.496984	0.170699	7.83433e-43	3.75009e-37
86	Penk+ Fibroblasts	10	ENSMUSG00000028517	Plpp3	0.232461	0.917758	0.653465	0.355736	0.161877	1.0833e-40	5.18548e-35
87	Penk+ Fibroblasts	10	ENSMUSG00000045573	Penk	0.379126	0.943879	0.60396	0.627732	0.356884	2.26048e-88	1.08203e-82
88	Penk+ Fibroblasts	10	ENSMUSG00000056481	Cd248	0.40367	1.16175	0.584158	0.691028	0.276087	1.61409e-68	7.72621e-63
89	Penk+ Fibroblasts	10	ENSMUSG00000057098	Ebf1	0.200985	1.92203	0.792079	0.253744	0.301364	1.02958e-74	4.92833e-69
90	Penk+ Fibroblasts	10	ENSMUSG00000033327	Tnxb	0.345536	1.8285	0.772277	0.447425	0.250424	3.0463e-62	1.45818e-56
91	Penk+ Fibroblasts	10	ENSMUSG00000029096	Htra3	0.440657	1.10643	0.683168	0.645019	0.405743	1.88411e-100	9.01872e-95
92	Penk+ Fibroblasts	10	ENSMUSG00000026043	Col3a1	0.378686	5.45894	0.950495	0.398409	0.410038	1.62372e-101	7.77232e-96
93	Penk+ Fibroblasts	10	ENSMUSG00000027074	Slc43a3	0.239706	0.793612	0.633663	0.378286	0.13359	7.7732e-34	3.72083e-28
94	Penk+ Fibroblasts	10	ENSMUSG00000029659	Medag	0.205831	0.234769	0.356436	0.577469	0.0948526	1.84095e-24	8.81214e-19
95	Penk+ Fibroblasts	10	ENSMUSG00000070436	Serpinh1	0.193921	1.89115	0.782178	0.247924	0.136358	1.66083e-34	7.94994e-29
96	Penk+ Fibroblasts	10	ENSMUSG00000071984	Fndc1	0.274119	0.680441	0.50495	0.542864	0.201444	2.65027e-50	1.26861e-44
97	Penk+ Fibroblasts	10	ENSMUSG00000019929	Dcn	0.31992	16.3726	0.960396	0.333113	0.215638	9.29425e-54	4.44892e-48
98	Penk+ Fibroblasts	10	ENSMUSG00000024011	Pi16	0.29893	0.968843	0.435644	0.686181	0.297547	8.89487e-74	4.25774e-68
99	Penk+ Fibroblasts	10	ENSMUSG00000022816	Fstl1	0.301603	1.62361	0.821782	0.36701	0.266397	3.79527e-66	1.8167e-60
100	Penk+ Fibroblasts	10	ENSMUSG00000038521	C1s1	0.251531	1.04233	0.772277	0.325701	0.172358	3.09927e-43	1.48354e-37
101	T cells	11	ENSMUSG00000002033	Cd3g	0.593485	3.53936	0.8875	0.668716	0.720469	6.49643e-149	3.10967e-143
102	T cells	11	ENSMUSG00000005947	Itgae	0.508137	0.715197	0.6	0.846895	0.468885	1.39264e-96	6.66622e-91
103	T cells	11	ENSMUSG00000015437	Gzmb	0.58209	7.49912	0.75	0.77612	0.607946	2.25475e-125	1.07929e-119
104	T cells	11	ENSMUSG00000021108	Prkch	0.205036	0.417334	0.5	0.410072	0.151762	4.60727e-32	2.20538e-26
105	T cells	11	ENSMUSG00000023132	Gzma	0.67181	33.4191	0.85	0.790364	0.708105	2.57097e-146	1.23066e-140
106	T cells	11	ENSMUSG00000024910	Ctsw	0.374402	0.884192	0.6875	0.544585	0.508339	1.01993e-104	4.88216e-99
107	T cells	11	ENSMUSG00000025163	Cd7	0.284761	0.315508	0.4	0.711902	0.321217	2.33735e-66	1.11883e-60
108	T cells	11	ENSMUSG00000025647	Shisa5	0.148246	1.57762	0.7375	0.201011	0.163674	1.83416e-34	8.77966e-29
109	T cells	11	ENSMUSG00000026117	Zap70	0.160315	0.287925	0.3625	0.442248	0.244077	1.06215e-50	5.08423e-45
110	T cells	11	ENSMUSG00000026826	Nr4a2	0.387049	1.17791	0.5875	0.658806	0.381023	1.47596e-78	7.06502e-73
111	T cells	11	ENSMUSG00000079110	Capn3	0.161356	0.136468	0.1875	0.860564	0.102966	3.0656e-22	1.46742e-16
112	T cells	11	ENSMUSG00000027843	Ptpn22	0.19929	0.388729	0.45	0.442868	0.257833	1.73827e-53	8.32064e-48
113	T cells	11	ENSMUSG00000028071	Sh2d2a	0.143231	0.265004	0.2875	0.498196	0.188148	2.13159e-39	1.02033e-33
114	T cells	11	ENSMUSG00000029603	Dtx1	0.14481	0.297178	0.3625	0.399475	0.19003	8.89213e-40	4.25643e-34
115	T cells	11	ENSMUSG00000030124	Lag3	0.230031	0.488224	0.4875	0.471859	0.174944	9.81478e-37	4.69808e-31
116	T cells	11	ENSMUSG00000030165	Klrd1	0.32164	1.6698	0.6375	0.504533	0.444824	1.23723e-91	5.92231e-86
117	T cells	11	ENSMUSG00000032094	Cd3d	0.423193	1.3563	0.7625	0.555008	0.577385	5.11003e-119	2.44604e-113
118	T cells	11	ENSMUSG00000032380	Dapk2	0.188187	0.571938	0.4875	0.386025	0.235184	6.69616e-49	3.20528e-43
119	T cells	11	ENSMUSG00000035042	Ccl5	0.657312	48.9559	0.9625	0.682922	0.785929	1.03389e-162	4.94898e-157
120	T cells	11	ENSMUSG00000036478	Btg1	0.183034	3.57254	0.8875	0.206236	0.284166	7.93787e-59	3.79965e-53
121	T cells	11	ENSMUSG00000037754	Ppp1r16b	0.247327	1.22239	0.6625	0.373324	0.256637	3.03794e-53	1.45418e-47
122	T cells	11	ENSMUSG00000040957	Cables1	0.151908	0.297909	0.325	0.467409	0.104314	1.64092e-22	7.85465e-17
123	T cells	11	ENSMUSG00000038304	Cd160	0.241552	0.317425	0.3125	0.772967	0.218518	1.57033e-45	7.51678e-40
124	T cells	11	ENSMUSG00000070691	Runx3	0.308621	0.851524	0.6	0.514368	0.296436	2.55877e-61	1.22482e-55
125	T cells	11	ENSMUSG00000052374	Actn2	0.19007	0.338359	0.4	0.475174	0.238174	1.66317e-49	7.96116e-44
126	T cells	11	ENSMUSG00000052837	Junb	0.153738	5.1469	0.925	0.166203	0.253682	1.20535e-52	5.7697e-47
127	T cells	11	ENSMUSG00000053977	Cd8a	0.691524	1.96021	0.775	0.892288	0.668763	4.54322e-138	2.17472e-132
128	T cells	11	ENSMUSG00000000409	Lck	0.334227	0.663362	0.6375	0.524278	0.413263	3.71036e-85	1.77605e-79
129	T cells	11	ENSMUSG00000054435	Gimap4	0.16034	0.676215	0.575	0.278852	0.216131	4.76791e-45	2.28228e-39
130	T cells	11	ENSMUSG00000004612	Nkg7	0.408414	3.79023	0.8	0.510518	0.592799	3.19905e-122	1.5313e-116
131	T cells	11	ENSMUSG00000064109	Hcst	0.152993	0.713125	0.55	0.278169	0.182394	3.08542e-38	1.47691e-32
132	T cells	11	ENSMUSG00000068129	Cst7	0.18224	0.296484	0.375	0.485974	0.254059	1.01105e-52	4.83961e-47
133	T cells	11	ENSMUSG00000068227	Il2rb	0.205622	0.60522	0.45	0.456938	0.297064	1.90675e-61	9.1271e-56
134	T cells	11	ENSMUSG00000070803	Cited4	0.268734	0.417103	0.4	0.671836	0.241134	4.18653e-50	2.00398e-44
135	T cells	11	ENSMUSG00000075010	AW112010	0.258466	4.47461	0.85	0.304077	0.249897	7.04242e-52	3.37102e-46
136	T cells	11	ENSMUSG00000090176	Cd200r2	0.16181	0.154576	0.1875	0.862985	0.132408	3.63527e-28	1.74011e-22
137	T cells	11	ENSMUSG00000032093	Cd3e	0.481198	1.22022	0.7125	0.675365	0.575597	1.20208e-118	5.75406e-113
138	T cells	11	ENSMUSG00000076490	Trbc1	0.159741	0.945018	0.3375	0.473307	0.219458	1.01385e-45	4.85302e-40
139	T cells	11	ENSMUSG00000076498	Trbc2	0.302631	1.83597	0.7125	0.424745	0.483141	1.61138e-99	7.71328e-94
140	T cells	11	ENSMUSG00000076749	Tcrg-C1	0.301008	1.20535	0.5125	0.587332	0.358849	4.9977e-74	2.39227e-68
141	T cells	11	ENSMUSG00000076752	Tcrg-C2	0.309285	0.514211	0.4125	0.749783	0.284297	7.46692e-59	3.57422e-53
142	T cells	11	ENSMUSG00000076928	Trac	0.306933	1.00536	0.65	0.472204	0.442412	3.87231e-91	1.85358e-85
143	T cells	11	ENSMUSG00000026395	Ptprc	0.14434	0.763782	0.5875	0.245685	0.14957	1.27322e-31	6.09456e-26
144	T cells	11	ENSMUSG00000062082	Cd200r4	0.188411	0.25978	0.325	0.579726	0.157352	3.44699e-33	1.64999e-27
145	T cells	11	ENSMUSG00000026358	Rgs1	0.369041	1.59186	0.6875	0.536787	0.342818	9.30595e-71	4.45452e-65
146	T cells	11	ENSMUSG00000030775	Trat1	0.146926	0.220403	0.2625	0.559717	0.178552	1.838e-37	8.79802e-32
147	T cells	11	ENSMUSG00000076757	Tcrg-C4	0.231642	0.499802	0.5	0.463284	0.33365	6.87351e-69	3.29017e-63
148	T cells	11	ENSMUSG00000102112	1810041H14Rik	0.170229	0.184048	0.2	0.851146	0.137128	4.07753e-29	1.95181e-23
149	T cells	11	ENSMUSG00000100150	Gm19585	0.287087	0.475246	0.5125	0.56017	0.36335	6.02445e-75	2.88375e-69
150	T cells	11	ENSMUSG00000114333	1700084D21Rik	0.304307	0.469945	0.3125	0.973782	0.277549	1.74863e-57	8.37022e-52
151	NENs	12	ENSMUSG00000006575	Rundc3a	0.321554	0.477078	0.413793	0.777088	0.195206	7.50609e-32	3.59297e-26
152	NENs	12	ENSMUSG00000021087	Rtn1	0.323538	1.44953	0.465517	0.695007	0.223722	2.74807e-36	1.31543e-30
153	NENs	12	ENSMUSG00000021647	Cartpt	0.199038	0.850643	0.258621	0.769613	0.130727	7.88305e-22	3.77341e-16
154	NENs	12	ENSMUSG00000023484	Prph	0.493389	1.96775	0.689655	0.715414	0.402701	2.92721e-64	1.40118e-58
155	NENs	12	ENSMUSG00000024268	Celf4	0.277639	0.616746	0.431034	0.644122	0.196858	4.15436e-32	1.98858e-26
156	NENs	12	ENSMUSG00000025777	Gdap1	0.202043	0.151093	0.224138	0.901422	0.102088	2.23339e-17	1.06907e-11
157	NENs	12	ENSMUSG00000026204	Ptprn	0.326553	0.606909	0.413793	0.789169	0.213848	9.45433e-35	4.52554e-29
158	NENs	12	ENSMUSG00000027273	Snap25	0.347553	0.95995	0.482759	0.719932	0.276073	1.91504e-44	9.1668e-39
159	NENs	12	ENSMUSG00000027500	Stmn2	0.306553	1.45865	0.5	0.613106	0.224112	2.39017e-36	1.14411e-30
160	NENs	12	ENSMUSG00000027801	Tm4sf4	0.254405	0.820913	0.327586	0.776605	0.175961	7.36912e-29	3.52741e-23
161	NENs	12	ENSMUSG00000028137	Celf3	0.318223	0.735597	0.413793	0.769038	0.192151	2.24095e-31	1.07268e-25
162	NENs	12	ENSMUSG00000061601	Pclo	0.216977	0.31952	0.275862	0.786542	0.110848	9.6952e-19	4.64084e-13
163	NENs	12	ENSMUSG00000029223	Uchl1	0.259136	1.07381	0.482759	0.536783	0.199589	1.56266e-32	7.48006e-27
164	NENs	12	ENSMUSG00000030000	Add2	0.199083	0.146873	0.224138	0.888216	0.125828	4.54949e-21	2.17772e-15
165	NENs	12	ENSMUSG00000031137	Fgf13	0.202911	0.239488	0.275862	0.735553	0.116429	1.31501e-19	6.29462e-14
166	NENs	12	ENSMUSG00000032303	Chrna3	0.242814	0.243135	0.310345	0.782402	0.130669	8.04644e-22	3.85162e-16
167	NENs	12	ENSMUSG00000032549	Rab6b	0.211236	0.442415	0.293103	0.720688	0.101879	2.40682e-17	1.15208e-11
168	NENs	12	ENSMUSG00000034891	Sncb	0.203382	0.169675	0.258621	0.786411	0.12281	1.33993e-20	6.41391e-15
169	NENs	12	ENSMUSG00000033061	Resp18	0.228275	0.763721	0.327586	0.696839	0.154585	1.54671e-25	7.40369e-20
170	NENs	12	ENSMUSG00000039278	Pcsk1n	0.441654	3.47062	0.706897	0.624779	0.345107	3.12982e-55	1.49816e-49
171	NENs	12	ENSMUSG00000004113	Cacna1b	0.229605	0.289822	0.275862	0.832317	0.120233	3.36911e-20	1.61271e-14
172	NENs	12	ENSMUSG00000070695	Cntnap5a	0.294513	0.34477	0.327586	0.899038	0.206786	1.1869e-33	5.68136e-28
173	NENs	12	ENSMUSG00000032826	Ank2	0.274719	0.816158	0.465517	0.590138	0.204591	2.60536e-33	1.24712e-27
174	NENs	12	ENSMUSG00000042750	Bex2	0.211689	0.560884	0.344828	0.613898	0.153002	2.72513e-25	1.30445e-19
175	NENs	12	ENSMUSG00000002265	Peg3	0.249571	0.740629	0.448276	0.556736	0.156194	8.69794e-26	4.16348e-20
176	NENs	12	ENSMUSG00000029245	Epha5	0.312926	0.676121	0.344828	0.907484	0.223817	2.65633e-36	1.27151e-30
177	NENs	12	ENSMUSG00000044288	Cnr1	0.228104	0.376855	0.293103	0.778238	0.136581	9.70461e-23	4.64534e-17
178	NENs	12	ENSMUSG00000048978	Nrsn1	0.202934	0.198326	0.275862	0.735635	0.127451	2.54521e-21	1.21832e-15
179	NENs	12	ENSMUSG00000055567	Unc80	0.228808	0.238367	0.275862	0.829427	0.118025	7.42641e-20	3.55483e-14
180	NENs	12	ENSMUSG00000035864	Syt1	0.204257	0.366451	0.275862	0.740433	0.121584	2.07755e-20	9.94467e-15
181	NENs	12	ENSMUSG00000052727	Map1b	0.23907	1.4586	0.586207	0.407824	0.152199	3.63244e-25	1.73875e-19
182	NENs	12	ENSMUSG00000061576	Dpp6	0.219035	0.357732	0.275862	0.794001	0.132134	4.76478e-22	2.28077e-16
183	NENs	12	ENSMUSG00000074483	Bglap	0.222031	0.644267	0.258621	0.858521	0.122162	1.68968e-20	8.08805e-15
184	NENs	12	ENSMUSG00000037217	Syn1	0.288534	0.41925	0.327586	0.880788	0.165759	2.83779e-27	1.35837e-21
185	NENs	12	ENSMUSG00000018865	Sult4a1	0.197197	0.269872	0.275862	0.71484	0.112436	5.49137e-19	2.62858e-13
186	NENs	12	ENSMUSG00000029361	Nos1	0.243025	0.796853	0.293103	0.829143	0.198752	2.10872e-32	1.00939e-26
187	NENs	12	ENSMUSG00000014602	Kif1a	0.2666	0.462898	0.362069	0.736324	0.197062	3.86168e-32	1.84849e-26
188	NENs	12	ENSMUSG00000022658	Tagln3	0.20638	0.204926	0.241379	0.855001	0.107927	2.75917e-18	1.32074e-12
189	NENs	12	ENSMUSG00000031837	Necab2	0.228306	0.194236	0.275862	0.827609	0.135174	1.6054e-22	7.68461e-17
190	NENs	12	ENSMUSG00000018411	Mapt	0.209892	0.529217	0.362069	0.579702	0.116722	1.184e-19	5.66751e-14
191	NENs	12	ENSMUSG00000028546	Elavl4	0.431189	0.889082	0.534483	0.806742	0.313088	3.18544e-50	1.52479e-44
192	NENs	12	ENSMUSG00000076441	Ass1	0.272814	1.87098	0.482759	0.565115	0.168325	1.13309e-27	5.42381e-22
193	NENs	12	ENSMUSG00000027581	Stmn3	0.269574	0.860195	0.413793	0.651471	0.210871	2.74671e-34	1.31478e-28
194	NENs	12	ENSMUSG00000006930	Hap1	0.22702	0.428842	0.344828	0.658357	0.133178	3.27887e-22	1.56951e-16
195	NENs	12	ENSMUSG00000019986	Ahi1	0.303765	1.04024	0.517241	0.58728	0.243203	2.54538e-39	1.21841e-33
196	NENs	12	ENSMUSG00000038738	Shank1	0.219337	0.652921	0.448276	0.489291	0.138426	5.01415e-23	2.40014e-17
197	NENs	12	ENSMUSG00000044349	Snhg11	0.648027	5.13404	0.758621	0.854218	0.546572	6.04537e-87	2.89376e-81
198	NENs	12	ENSMUSG00000087620	5330434G04Rik	0.249457	0.419128	0.275862	0.904283	0.154109	1.83384e-25	8.77813e-20
199	NENs	12	ENSMUSG00000021700	Rab3c	0.220072	0.368532	0.310345	0.709121	0.128842	1.54705e-21	7.40531e-16
200	NENs	12	ENSMUSG00000097451	Rian	0.378276	1.85526	0.655172	0.577368	0.215579	5.08499e-35	2.43405e-29
201	NK cells	13	ENSMUSG00000001281	Itgb7	0.142471	0.61102	0.564103	0.252561	0.249816	1.55108e-29	7.42463e-24
202	NK cells	13	ENSMUSG00000003882	Il7r	0.38268	0.931778	0.666667	0.57402	0.434108	2.91416e-50	1.39493e-44
203	NK cells	13	ENSMUSG00000007892	Rplp1	0.121949	6.18461	0.897436	0.135886	0.0600709	3.35304e-08	0.0160501
204	NK cells	13	ENSMUSG00000008668	Rps18	0.130536	6.63966	0.897436	0.145454	0.117976	9.66428e-15	4.62604e-09
205	NK cells	13	ENSMUSG00000015312	Gadd45b	0.14564	1.36983	0.589744	0.246954	0.127616	7.96984e-16	3.81496e-10
206	NK cells	13	ENSMUSG00000016559	H3f3b	0.141769	4.62967	0.948718	0.149433	0.116097	1.57207e-14	7.52511e-09
207	NK cells	13	ENSMUSG00000017404	Rpl19	0.134207	3.99838	0.871795	0.153943	0.118881	7.64491e-15	3.65942e-09
208	NK cells	13	ENSMUSG00000018239	Zcchc10	0.212013	0.551379	0.512821	0.413426	0.173072	6.29234e-21	3.01198e-15
209	NK cells	13	ENSMUSG00000019987	Arg1	0.271168	0.510213	0.487179	0.556608	0.380146	3.51025e-44	1.68026e-38
210	NK cells	13	ENSMUSG00000020395	Itk	0.161715	0.235852	0.307692	0.525573	0.193715	3.0434e-23	1.4568e-17
211	NK cells	13	ENSMUSG00000020423	Btg2	0.138428	1.89565	0.794872	0.174151	0.108998	9.89051e-14	4.73433e-08
212	NK cells	13	ENSMUSG00000020577	Tspan13	0.121244	0.773278	0.615385	0.197021	0.0695383	2.81917e-09	0.00134946
213	NK cells	13	ENSMUSG00000020644	Id2	0.267326	2.51227	0.923077	0.289603	0.347461	1.67175e-40	8.00225e-35
214	NK cells	13	ENSMUSG00000021025	Nfkbia	0.138087	3.02688	0.769231	0.179513	0.0959422	2.92292e-12	1.39912e-06
215	NK cells	13	ENSMUSG00000021298	Gpr132	0.184957	0.435219	0.410256	0.450833	0.211496	3.08443e-25	1.47644e-19
216	NK cells	13	ENSMUSG00000021728	Emb	0.184522	0.585129	0.538462	0.342683	0.203673	2.3254e-24	1.11311e-18
217	NK cells	13	ENSMUSG00000022015	Tnfsf11	0.156866	0.168863	0.230769	0.679755	0.104347	3.30213e-13	1.58065e-07
218	NK cells	13	ENSMUSG00000024399	Ltb	0.317065	1.50996	0.74359	0.426398	0.391745	1.73475e-45	8.30381e-40
219	NK cells	13	ENSMUSG00000025647	Shisa5	0.131706	1.173	0.820513	0.160516	0.132057	2.52645e-16	1.20935e-10
220	NK cells	13	ENSMUSG00000026360	Rgs2	0.21815	1.2371	0.717949	0.303851	0.205825	1.33405e-24	6.38577e-19
221	NK cells	13	ENSMUSG00000026770	Il2ra	0.182087	0.191091	0.307692	0.591783	0.199016	7.74217e-24	3.70598e-18
222	NK cells	13	ENSMUSG00000030114	Klrg1	0.357394	0.373438	0.435897	0.819904	0.373036	2.21683e-43	1.06114e-37
223	NK cells	13	ENSMUSG00000030707	Coro1a	0.128516	1.34492	0.74359	0.172832	0.133128	1.91528e-16	9.16793e-11
224	NK cells	13	ENSMUSG00000031880	Rrad	0.139268	0.601308	0.358974	0.387962	0.12403	2.01599e-15	9.65e-10
225	NK cells	13	ENSMUSG00000032035	Ets1	0.134269	0.840924	0.692308	0.193944	0.142215	1.82689e-17	8.74483e-12
226	NK cells	13	ENSMUSG00000032238	Rora	0.149084	0.502308	0.512821	0.290714	0.145551	7.71058e-18	3.69085e-12
227	NK cells	13	ENSMUSG00000034724	Cnot6l	0.120214	0.501041	0.410256	0.293022	0.0762575	4.88617e-10	0.000233888
228	NK cells	13	ENSMUSG00000036155	Mgat5	0.119338	0.296876	0.384615	0.310279	0.0954751	3.29969e-12	1.57948e-06
229	NK cells	13	ENSMUSG00000036478	Btg1	0.178481	3.28075	0.923077	0.193355	0.250082	1.44822e-29	6.93227e-24
230	NK cells	13	ENSMUSG00000039264	Gimap3	0.217432	0.766526	0.615385	0.353327	0.330879	1.22364e-38	5.85725e-33
231	NK cells	13	ENSMUSG00000037742	Eef1a1	0.133179	6.20768	0.948718	0.140378	0.141178	2.38867e-17	1.14339e-11
232	NK cells	13	ENSMUSG00000026069	Il1rl1	0.480125	0.727065	0.589744	0.814125	0.367629	8.9988e-43	4.30749e-37
233	NK cells	13	ENSMUSG00000047898	Ccr4	0.123479	0.072631	0.128205	0.963135	0.107115	1.61121e-13	7.71244e-08
234	NK cells	13	ENSMUSG00000046908	Ltb4r1	0.230448	0.469768	0.461538	0.499305	0.255963	3.16874e-30	1.51679e-24
235	NK cells	13	ENSMUSG00000045817	Zfp36l2	0.148561	0.636559	0.538462	0.275899	0.130897	3.41046e-16	1.6325e-10
236	NK cells	13	ENSMUSG00000030108	Slc6a13	0.123093	0.161913	0.153846	0.800103	0.0905689	1.17989e-11	5.64783e-06
237	NK cells	13	ENSMUSG00000052837	Junb	0.204595	8.44389	0.846154	0.241794	0.272106	4.88874e-32	2.34011e-26
238	NK cells	13	ENSMUSG00000053310	Nrgn	0.240642	0.249721	0.358974	0.670359	0.178883	1.40283e-21	6.71499e-16
239	NK cells	13	ENSMUSG00000054408	Spcs3	0.146149	0.479243	0.410256	0.356237	0.0806531	1.55509e-10	7.44381e-05
240	NK cells	13	ENSMUSG00000057058	Skap1	0.143329	0.357668	0.384615	0.372656	0.215284	1.15965e-25	5.55095e-20
241	NK cells	13	ENSMUSG00000079845	Xlr4a	0.234276	0.298796	0.435897	0.537457	0.266525	2.06839e-31	9.90083e-26
242	NK cells	13	ENSMUSG00000062210	Tnfaip8	0.147989	0.269315	0.307692	0.480963	0.120426	5.12519e-15	2.45329e-09
243	NK cells	13	ENSMUSG00000018476	Kdm6b	0.154723	1.76016	0.769231	0.20114	0.133823	1.60022e-16	7.65983e-11
244	NK cells	13	ENSMUSG00000015619	Gata3	0.462849	1.47685	0.666667	0.694273	0.524497	1.78567e-60	8.54754e-55
245	NK cells	13	ENSMUSG00000031438	Rnf128	0.312708	0.699775	0.538462	0.580743	0.320313	1.88458e-37	9.02099e-32
246	NK cells	13	ENSMUSG00000022876	Samsn1	0.180166	0.451696	0.487179	0.369814	0.193602	3.13386e-23	1.5001e-17
247	NK cells	13	ENSMUSG00000026644	Acbd7	0.237454	0.219169	0.25641	0.926071	0.223165	1.51479e-26	7.25091e-21
248	NK cells	13	ENSMUSG00000028266	Lmo4	0.177638	0.962928	0.615385	0.288662	0.138015	5.41187e-17	2.59052e-11
249	NK cells	13	ENSMUSG00000082263	Gm11188	0.128205	0.161993	0.128205	1	0.112553	3.93639e-14	1.88425e-08
250	NK cells	13	ENSMUSG00000025794	Rpl14	0.135276	4.76878	0.948718	0.142589	0.13112	3.2194e-16	1.54104e-10
251	Macrophage-C	14	ENSMUSG00000001525	Tubb5	0.299078	7.56288	0.973684	0.307161	0.372096	2.21275e-42	1.05919e-36
252	Macrophage-C	14	ENSMUSG00000005233	Spc25	0.270673	0.185883	0.447368	0.605033	0.13383	3.34295e-16	1.60018e-10
253	Macrophage-C	14	ENSMUSG00000005470	Asf1b	0.350186	0.225355	0.605263	0.578567	0.179725	3.03817e-21	1.45429e-15
254	Macrophage-C	14	ENSMUSG00000006398	Cdc20	0.262906	0.329152	0.421053	0.624402	0.158365	6.73046e-19	3.2217e-13
255	Macrophage-C	14	ENSMUSG00000019942	Cdk1	0.349547	0.274469	0.578947	0.603763	0.218165	1.83317e-25	8.77491e-20
256	Macrophage-C	14	ENSMUSG00000020330	Hmmr	0.336027	0.178953	0.421053	0.798064	0.252404	3.19483e-29	1.52928e-23
257	Macrophage-C	14	ENSMUSG00000020649	Rrm2	0.365025	0.379797	0.605263	0.603085	0.238328	1.12177e-27	5.3696e-22
258	Macrophage-C	14	ENSMUSG00000020897	Aurkb	0.267712	0.161377	0.394737	0.678205	0.167195	7.21784e-20	3.45499e-14
259	Macrophage-C	14	ENSMUSG00000022033	Pbk	0.301709	0.198095	0.5	0.603418	0.196037	4.9206e-23	2.35536e-17
260	Macrophage-C	14	ENSMUSG00000022034	Esco2	0.278583	0.149968	0.342105	0.81432	0.229688	9.96129e-27	4.76821e-21
261	Macrophage-C	14	ENSMUSG00000022322	Shcbp1	0.370129	0.193748	0.5	0.740258	0.270105	3.63543e-31	1.74019e-25
262	Macrophage-C	14	ENSMUSG00000023015	Racgap1	0.218198	0.219634	0.526316	0.414577	0.16579	1.02955e-19	4.92817e-14
263	Macrophage-C	14	ENSMUSG00000023505	Cdca3	0.373417	0.273331	0.5	0.746835	0.201975	1.09726e-23	5.25231e-18
264	Macrophage-C	14	ENSMUSG00000024590	Lmnb1	0.238418	0.421661	0.684211	0.348457	0.202055	1.07529e-23	5.14711e-18
265	Macrophage-C	14	ENSMUSG00000024660	Incenp	0.334095	0.328401	0.605263	0.551983	0.180707	2.37074e-21	1.13481e-15
266	Macrophage-C	14	ENSMUSG00000026196	Bard1	0.230136	0.142329	0.421053	0.546573	0.126105	2.36414e-15	1.13165e-09
267	Macrophage-C	14	ENSMUSG00000026429	Ube2t	0.260542	0.228648	0.394737	0.660039	0.145949	1.5561e-17	7.44867e-12
268	Macrophage-C	14	ENSMUSG00000027306	Nusap1	0.319899	0.308785	0.526316	0.607807	0.211344	1.02776e-24	4.91961e-19
269	Macrophage-C	14	ENSMUSG00000027496	Aurka	0.221036	0.126077	0.342105	0.646105	0.138537	1.01552e-16	4.86104e-11
270	Macrophage-C	14	ENSMUSG00000027715	Ccna2	0.2572	0.0748555	0.315789	0.814467	0.106735	3.2084e-13	1.53578e-07
271	Macrophage-C	14	ENSMUSG00000028044	Cks1b	0.221729	0.333027	0.578947	0.382987	0.153703	2.18839e-18	1.04752e-12
272	Macrophage-C	14	ENSMUSG00000028832	Stmn1	0.360955	2.41783	0.921053	0.391894	0.30677	3.40361e-35	1.62922e-29
273	Macrophage-C	14	ENSMUSG00000028873	Cdca8	0.391778	0.33396	0.605263	0.647285	0.237366	1.43049e-27	6.84738e-22
274	Macrophage-C	14	ENSMUSG00000030677	Kif22	0.242911	0.129668	0.394737	0.615373	0.125533	2.73259e-15	1.30802e-09
275	Macrophage-C	14	ENSMUSG00000030978	Rrm1	0.295954	0.292496	0.578947	0.511194	0.144614	2.18142e-17	1.04419e-11
276	Macrophage-C	14	ENSMUSG00000031004	Mki67	0.315888	0.199386	0.526316	0.600187	0.241146	5.50202e-28	2.63367e-22
277	Macrophage-C	14	ENSMUSG00000032218	Ccnb2	0.439937	0.374777	0.578947	0.759891	0.293347	1.01671e-33	4.86672e-28
278	Macrophage-C	14	ENSMUSG00000040084	Bub1b	0.237824	0.118452	0.342105	0.695177	0.100426	1.59175e-12	7.6193e-07
279	Macrophage-C	14	ENSMUSG00000034349	Smc4	0.255312	0.539375	0.763158	0.334547	0.203233	7.98317e-24	3.82134e-18
280	Macrophage-C	14	ENSMUSG00000035683	Melk	0.237588	0.112877	0.315789	0.752362	0.14152	4.77207e-17	2.28426e-11
281	Macrophage-C	14	ENSMUSG00000038943	Prc1	0.305657	0.118229	0.394737	0.77433	0.210833	1.16967e-24	5.59889e-19
282	Macrophage-C	14	ENSMUSG00000042489	Clspn	0.225764	0.129791	0.394737	0.571936	0.166757	8.06261e-20	3.85936e-14
283	Macrophage-C	14	ENSMUSG00000049932	H2afx	0.374259	0.873695	0.736842	0.507923	0.280792	2.43624e-32	1.16616e-26
284	Macrophage-C	14	ENSMUSG00000041859	Mcm3	0.224724	0.291337	0.605263	0.371283	0.13487	2.5691e-16	1.22976e-10
285	Macrophage-C	14	ENSMUSG00000045328	Cenpe	0.220816	0.205098	0.368421	0.599356	0.160312	4.1136e-19	1.96907e-13
286	Macrophage-C	14	ENSMUSG00000037628	Cdkn3	0.251248	0.153013	0.342105	0.734418	0.15107	4.25971e-18	2.03901e-12
287	Macrophage-C	14	ENSMUSG00000054717	Hmgb2	0.365372	2.49549	0.947368	0.385671	0.402663	9.48574e-46	4.54058e-40
288	Macrophage-C	14	ENSMUSG00000020914	Top2a	0.461534	0.649925	0.710526	0.649566	0.379084	3.76033e-43	1.79997e-37
289	Macrophage-C	14	ENSMUSG00000023004	Tuba1b	0.262612	3.25053	0.868421	0.302402	0.250268	5.4829e-29	2.62452e-23
290	Macrophage-C	14	ENSMUSG00000094777	Hist1h2ap	0.34785	0.557641	0.473684	0.73435	0.232361	5.06875e-27	2.42628e-21
291	Macrophage-C	14	ENSMUSG00000017716	Birc5	0.51717	0.719002	0.736842	0.701873	0.405027	5.20631e-46	2.49213e-40
292	Macrophage-C	14	ENSMUSG00000068101	Cenpm	0.335723	0.221222	0.578947	0.579885	0.222708	5.81449e-26	2.78325e-20
293	Macrophage-C	14	ENSMUSG00000024989	Cep55	0.285991	0.140168	0.315789	0.905637	0.153487	2.31124e-18	1.10633e-12
294	Macrophage-C	14	ENSMUSG00000056394	Lig1	0.224594	0.296283	0.552632	0.406408	0.126031	2.40896e-15	1.15311e-09
295	Macrophage-C	14	ENSMUSG00000074476	Spc24	0.292862	0.186731	0.5	0.585724	0.170432	3.18341e-20	1.52382e-14
296	Macrophage-C	14	ENSMUSG00000029910	Mad2l1	0.244956	0.236977	0.5	0.489912	0.134564	2.77578e-16	1.32869e-10
297	Macrophage-C	14	ENSMUSG00000028312	Smc2	0.230468	0.337396	0.605263	0.380774	0.149504	6.33006e-18	3.03003e-12
298	Macrophage-C	14	ENSMUSG00000015880	Ncapg	0.246618	0.130321	0.342105	0.720883	0.132792	4.34749e-16	2.08103e-10
299	Macrophage-C	14	ENSMUSG00000026605	Cenpf	0.288161	0.203701	0.421053	0.684382	0.185654	6.78868e-22	3.24956e-16
300	Macrophage-C	14	ENSMUSG00000098318	Lockd	0.311924	0.340817	0.684211	0.455889	0.209659	1.57342e-24	7.53157e-19
301	NK cells	15	ENSMUSG00000062524	Ncr1	0.223542	0.380538	0.236842	0.943845	0.206109	3.85991e-24	1.84764e-18
302	NK cells	15	ENSMUSG00000008668	Rps18	0.143266	6.74037	0.973684	0.147138	0.178549	4.09033e-21	1.95794e-15
303	NK cells	15	ENSMUSG00000009687	Fxyd5	0.132072	0.834412	0.763158	0.17306	0.130031	8.74706e-16	4.18699e-10
304	NK cells	15	ENSMUSG00000089727	Klra8	0.131579	0.23434	0.131579	1	0.115565	3.4171e-14	1.63568e-08
305	NK cells	15	ENSMUSG00000018293	Pfn1	0.132393	2.81235	0.947368	0.139748	0.103298	7.67626e-13	3.67443e-07
306	NK cells	15	ENSMUSG00000020009	Ifngr1	0.159862	1.206	0.684211	0.233644	0.0959557	4.95599e-12	2.3723e-06
307	NK cells	15	ENSMUSG00000020644	Id2	0.184087	2.06662	0.736842	0.249832	0.22007	1.13277e-25	5.42229e-20
308	NK cells	15	ENSMUSG00000024014	Pim1	0.150987	1.20776	0.684211	0.220674	0.153951	2.05532e-18	9.83827e-13
309	NK cells	15	ENSMUSG00000024399	Ltb	0.146144	0.719126	0.605263	0.241456	0.243419	3.0969e-28	1.4824e-22
310	NK cells	15	ENSMUSG00000024910	Ctsw	0.153801	0.463397	0.473684	0.324692	0.208601	2.05606e-24	9.84183e-19
311	NK cells	15	ENSMUSG00000025647	Shisa5	0.141374	1.35451	0.789474	0.179074	0.150917	4.42794e-18	2.11954e-12
312	NK cells	15	ENSMUSG00000026012	Cd28	0.301242	0.433583	0.368421	0.817656	0.254812	1.73787e-29	8.31874e-24
313	NK cells	15	ENSMUSG00000027863	Cd2	0.17242	0.31562	0.368421	0.467998	0.182577	1.47775e-21	7.07359e-16
314	NK cells	15	ENSMUSG00000030149	Klrk1	0.18142	0.368047	0.289474	0.626723	0.151788	3.55259e-18	1.70053e-12
315	NK cells	15	ENSMUSG00000030167	Klrc1	0.175144	0.361396	0.184211	0.95078	0.140963	5.49496e-17	2.63029e-11
316	NK cells	15	ENSMUSG00000030220	Arhgdib	0.1468	1.27414	0.763158	0.192358	0.128389	1.3259e-15	6.34674e-10
317	NK cells	15	ENSMUSG00000030707	Coro1a	0.17151	1.60356	0.868421	0.197497	0.207766	2.53914e-24	1.21542e-18
318	NK cells	15	ENSMUSG00000030744	Rps3	0.141661	4.35851	0.947368	0.149531	0.136546	1.68089e-16	8.04599e-11
319	NK cells	15	ENSMUSG00000031132	Cd40lg	0.157895	0.140476	0.157895	1	0.138956	9.13193e-17	4.37122e-11
320	NK cells	15	ENSMUSG00000032035	Ets1	0.13468	1.00847	0.605263	0.222514	0.14766	1.00934e-17	4.83144e-12
321	NK cells	15	ENSMUSG00000032094	Cd3d	0.177222	0.684481	0.552632	0.320687	0.254852	1.72066e-29	8.23635e-24
322	NK cells	15	ENSMUSG00000056290	Ms4a4b	0.628441	2.30206	0.842105	0.746274	0.580709	1.93877e-65	9.28041e-60
323	NK cells	15	ENSMUSG00000036478	Btg1	0.139782	2.29932	0.947368	0.147548	0.204844	5.31341e-24	2.54339e-18
324	NK cells	15	ENSMUSG00000039264	Gimap3	0.208223	0.700338	0.631579	0.329686	0.326667	2.2098e-37	1.05778e-31
325	NK cells	15	ENSMUSG00000040747	Cd53	0.163578	1.48862	0.736842	0.221998	0.119361	1.3054e-14	6.24862e-09
326	NK cells	15	ENSMUSG00000033220	Rac2	0.141313	1.26276	0.710526	0.198885	0.146498	1.35419e-17	6.48213e-12
327	NK cells	15	ENSMUSG00000044199	S1pr4	0.134272	0.239487	0.263158	0.510233	0.100355	1.6209e-12	7.75883e-07
328	NK cells	15	ENSMUSG00000050241	Klre1	0.188096	0.398974	0.315789	0.595638	0.188866	3.01443e-22	1.44293e-16
329	NK cells	15	ENSMUSG00000050232	Cxcr3	0.203773	0.317663	0.289474	0.703943	0.135901	1.97909e-16	9.47339e-11
330	NK cells	15	ENSMUSG00000052837	Junb	0.159766	5.44448	0.921053	0.17346	0.234252	3.14296e-27	1.50445e-21
331	NK cells	15	ENSMUSG00000054435	Gimap4	0.180467	0.887222	0.526316	0.342887	0.190292	2.10206e-22	1.0062e-16
332	NK cells	15	ENSMUSG00000055170	Ifng	0.16673	0.27883	0.236842	0.70397	0.157323	8.76068e-19	4.19351e-13
333	NK cells	15	ENSMUSG00000004612	Nkg7	0.22571	2.42644	0.631579	0.357374	0.313604	6.03539e-36	2.88898e-30
334	NK cells	15	ENSMUSG00000052736	Klrc2	0.203586	0.16978	0.210526	0.967033	0.177207	5.74262e-21	2.74884e-15
335	NK cells	15	ENSMUSG00000060550	H2-Q7	0.183899	1.1289	0.736842	0.249577	0.160036	4.41071e-19	2.11129e-13
336	NK cells	15	ENSMUSG00000064109	Hcst	0.225624	0.938903	0.657895	0.342948	0.236719	1.6847e-27	8.06422e-22
337	NK cells	15	ENSMUSG00000057841	Rpl32	0.133985	6.34072	1	0.133985	0.151913	3.44188e-18	1.64754e-12
338	NK cells	15	ENSMUSG00000025508	Rplp2	0.13941	4.5474	1	0.13941	0.142012	4.21401e-17	2.01714e-11
339	NK cells	15	ENSMUSG00000067274	Rplp0	0.142744	5.31303	1	0.142744	0.157728	7.90662e-19	3.78469e-13
340	NK cells	15	ENSMUSG00000068227	Il2rb	0.187527	0.441261	0.526316	0.3563	0.25583	1.34362e-29	6.43156e-24
341	NK cells	15	ENSMUSG00000075010	AW112010	0.214953	3.70368	0.815789	0.263491	0.154071	1.99408e-18	9.54515e-13
342	NK cells	15	ENSMUSG00000048163	Selplg	0.161146	0.766948	0.605263	0.266242	0.18969	2.44755e-22	1.17158e-16
343	NK cells	15	ENSMUSG00000076490	Trbc1	0.145248	0.632744	0.421053	0.344963	0.198624	2.55887e-23	1.22487e-17
344	NK cells	15	ENSMUSG00000076498	Trbc2	0.26025	1.38485	0.763158	0.341017	0.364161	1.65446e-41	7.91946e-36
345	NK cells	15	ENSMUSG00000076928	Trac	0.153103	0.785541	0.394737	0.387862	0.186477	5.51303e-22	2.63895e-16
346	NK cells	15	ENSMUSG00000030830	Itgal	0.131327	0.247808	0.263158	0.499041	0.112958	6.61836e-14	3.16804e-08
347	NK cells	15	ENSMUSG00000000486	2022-09-01	0.205604	0.851872	0.631579	0.32554	0.255102	1.61504e-29	7.73077e-24
348	NK cells	15	ENSMUSG00000079523	Tmsb10	0.177306	7.48685	1	0.177306	0.225128	3.15447e-26	1.50996e-20
349	NK cells	15	ENSMUSG00000030178	Klra13-ps	0.131579	0.226924	0.131579	1	0.115565	3.41711e-14	1.63568e-08
350	NK cells	15	ENSMUSG00000030325	Klrb1c	0.174768	0.230148	0.184211	0.948741	0.139002	9.02693e-17	4.32096e-11
351	Macrophage-C	16	ENSMUSG00000000078	Klf6	0.159171	1.06393	0.941176	0.169119	0.108483	2.3542e-12	1.1269e-06
352	Macrophage-C	16	ENSMUSG00000000594	Gm2a	0.364234	3.12085	1	0.364234	0.297496	2.77294e-31	1.32734e-25
353	Macrophage-C	16	ENSMUSG00000000682	Cd52	0.156408	0.66246	0.794118	0.196959	0.104893	5.40751e-12	2.58843e-06
354	Macrophage-C	16	ENSMUSG00000001020	S100a4	0.148212	0.589449	0.617647	0.239963	0.129292	1.91309e-14	9.15749e-09
355	Macrophage-C	16	ENSMUSG00000001281	Itgb7	0.206129	0.633556	0.794118	0.259569	0.315216	4.66203e-33	2.23159e-27
356	Macrophage-C	16	ENSMUSG00000002204	Napsa	0.278309	0.377451	0.588235	0.473125	0.24121	1.1916e-25	5.70387e-20
357	Macrophage-C	16	ENSMUSG00000004207	Psap	0.202694	3.69853	1	0.202694	0.169249	1.89369e-18	9.06462e-13
358	Macrophage-C	16	ENSMUSG00000009687	Fxyd5	0.165087	0.885595	0.911765	0.181063	0.156593	3.50563e-17	1.67805e-11
359	Macrophage-C	16	ENSMUSG00000031494	Cd209a	0.458197	1.08601	0.529412	0.865483	0.392032	9.30417e-41	4.45366e-35
360	Macrophage-C	16	ENSMUSG00000038642	Ctss	0.148491	1.56828	0.941176	0.157771	0.0785068	2.47675e-09	0.00118556
361	Macrophage-C	16	ENSMUSG00000018819	Lsp1	0.224005	0.29868	0.735294	0.304647	0.190696	1.35032e-20	6.46363e-15
362	Macrophage-C	16	ENSMUSG00000019122	Ccl9	0.154653	0.746008	0.588235	0.262911	0.12411	6.33678e-14	3.03325e-08
363	Macrophage-C	16	ENSMUSG00000022205	Sub1	0.169716	1.48402	0.970588	0.174859	0.154686	5.44376e-17	2.60579e-11
364	Macrophage-C	16	ENSMUSG00000061100	Retnla	0.188101	10.9538	0.264706	0.710604	0.107084	3.25524e-12	1.5582e-06
365	Macrophage-C	16	ENSMUSG00000024014	Pim1	0.148748	0.810835	0.911765	0.163144	0.167581	2.78169e-18	1.33152e-12
366	Macrophage-C	16	ENSMUSG00000024521	Pmaip1	0.231664	0.268622	0.558824	0.414557	0.135951	4.10917e-15	1.96695e-09
367	Macrophage-C	16	ENSMUSG00000026832	Cytip	0.160534	0.3085	0.676471	0.237312	0.176221	3.79585e-19	1.81698e-13
368	Macrophage-C	16	ENSMUSG00000027398	Il1b	0.23401	0.457301	0.470588	0.497272	0.135951	4.10933e-15	1.96703e-09
369	Macrophage-C	16	ENSMUSG00000027447	Cst3	0.209262	13.5988	1	0.209262	0.101883	1.08604e-11	5.1986e-06
370	Macrophage-C	16	ENSMUSG00000028581	Laptm5	0.145358	0.914577	1	0.145358	0.122711	8.75639e-14	4.19146e-08
371	Macrophage-C	16	ENSMUSG00000028843	Sh3bgrl3	0.159832	1.80024	0.941176	0.169821	0.143047	7.9842e-16	3.82183e-10
372	Macrophage-C	16	ENSMUSG00000030214	Plbd1	0.280479	0.644772	0.735294	0.381452	0.15708	3.13366e-17	1.5e-11
373	Macrophage-C	16	ENSMUSG00000030707	Coro1a	0.161215	1.27646	0.970588	0.1661	0.202225	9.47793e-22	4.53684e-16
374	Macrophage-C	16	ENSMUSG00000031780	Ccl17	0.199976	0.182986	0.235294	0.849898	0.117941	2.63811e-13	1.2628e-07
375	Macrophage-C	16	ENSMUSG00000040659	Efhd2	0.158876	0.52971	0.823529	0.192921	0.0951946	5.12203e-11	2.45178e-05
376	Macrophage-C	16	ENSMUSG00000070868	Skint3	0.195095	0.130666	0.294118	0.663324	0.0972502	3.17937e-11	1.52188e-05
377	Macrophage-C	16	ENSMUSG00000039783	Kmo	0.169641	0.100525	0.352941	0.480649	0.084184	6.60876e-10	0.000316344
378	Macrophage-C	16	ENSMUSG00000036594	H2-Aa	0.217985	14.9586	0.970588	0.224591	0.119863	1.6917e-13	8.09771e-08
379	Macrophage-C	16	ENSMUSG00000073421	H2-Ab1	0.211307	18.218	0.941176	0.224513	0.115984	4.14891e-13	1.98598e-07
380	Macrophage-C	16	ENSMUSG00000037649	H2-DMa	0.279534	2.09461	1	0.279534	0.18448	5.65626e-20	2.7075e-14
381	Macrophage-C	16	ENSMUSG00000042817	Flt3	0.16042	0.0934058	0.323529	0.495845	0.0831233	8.45765e-10	0.000404846
382	Macrophage-C	16	ENSMUSG00000044156	Hepacam2	0.27304	0.206404	0.382353	0.714105	0.137699	2.7443e-15	1.31363e-09
383	Macrophage-C	16	ENSMUSG00000024610	Cd74	0.219853	53.6602	1	0.219853	0.118732	2.19707e-13	1.05168e-07
384	Macrophage-C	16	ENSMUSG00000046908	Ltb4r1	0.199701	0.308751	0.558824	0.35736	0.216829	3.27689e-23	1.56856e-17
385	Macrophage-C	16	ENSMUSG00000062825	Actg1	0.173346	4.67153	0.970588	0.178599	0.227107	3.07035e-24	1.4697e-18
386	Macrophage-C	16	ENSMUSG00000019876	Pkib	0.189112	0.206544	0.470588	0.401863	0.104408	6.05006e-12	2.896e-06
387	Macrophage-C	16	ENSMUSG00000060063	Alox5ap	0.249449	1.13219	0.911765	0.273589	0.209013	1.98367e-22	9.49532e-17
388	Macrophage-C	16	ENSMUSG00000060586	H2-Eb1	0.195731	12.7379	0.970588	0.201662	0.101117	1.29701e-11	6.20844e-06
389	Macrophage-C	16	ENSMUSG00000030147	Clec4b1	0.150196	0.291923	0.411765	0.364761	0.0857133	4.63122e-10	0.000221685
390	Macrophage-C	16	ENSMUSG00000059108	Ifitm6	0.193094	0.300299	0.529412	0.364733	0.174948	5.08993e-19	2.43641e-13
391	Macrophage-C	16	ENSMUSG00000063856	Gpx1	0.189092	1.87069	0.970588	0.194822	0.14298	8.10808e-16	3.88113e-10
392	Macrophage-C	16	ENSMUSG00000021880	Rnase6	0.269357	0.380504	0.676471	0.39818	0.138757	2.14941e-15	1.02887e-09
393	Macrophage-C	16	ENSMUSG00000099974	Bcl2a1d	0.211201	0.268286	0.558824	0.377939	0.151296	1.18999e-16	5.69618e-11
394	Macrophage-C	16	ENSMUSG00000031097	Tnni2	0.186685	0.150073	0.323529	0.577026	0.0789435	2.23728e-09	0.00107093
395	Macrophage-C	16	ENSMUSG00000018585	Atox1	0.161627	1.33172	0.970588	0.166525	0.101535	1.17733e-11	5.63555e-06
396	Macrophage-C	16	ENSMUSG00000038179	Slamf7	0.178076	0.186201	0.470588	0.378411	0.105285	4.93733e-12	2.36337e-06
397	Macrophage-C	16	ENSMUSG00000029413	Naaa	0.232414	0.617714	0.705882	0.329254	0.121658	1.11687e-13	5.34616e-08
398	Macrophage-C	16	ENSMUSG00000079547	H2-DMb1	0.182262	0.796856	0.911765	0.1999	0.0901833	1.6392e-10	7.84642e-05
399	Macrophage-C	16	ENSMUSG00000044162	Tnip3	0.149664	0.0673336	0.264706	0.565399	0.105083	5.17432e-12	2.47681e-06
400	Macrophage-C	16	ENSMUSG00000050335	Lgals3	0.183192	1.46266	0.882353	0.207617	0.147768	2.68537e-16	1.28542e-10
401	Smooth muscle cells B	17	ENSMUSG00000020676	Ccl11	0.391767	1.92345	0.709677	0.552035	0.405129	4.75433e-39	2.27577e-33
402	Smooth muscle cells B	17	ENSMUSG00000000359	Rem1	0.175511	0.467863	0.354839	0.494621	0.135521	4.65641e-14	2.2289e-08
403	Smooth muscle cells B	17	ENSMUSG00000004558	Ndrg2	0.172738	0.862399	0.516129	0.33468	0.0984016	1.32988e-10	6.36579e-05
404	Smooth muscle cells B	17	ENSMUSG00000009876	Cox4i2	0.547005	1.55949	0.645161	0.847857	0.400372	1.31397e-38	6.28961e-33
405	Smooth muscle cells B	17	ENSMUSG00000017344	Vtn	0.642337	2.90364	0.774194	0.829685	0.595984	8.18761e-57	3.91919e-51
406	Smooth muscle cells B	17	ENSMUSG00000017417	Plxdc1	0.267689	0.472597	0.322581	0.829836	0.228954	1.01363e-22	4.852e-17
407	Smooth muscle cells B	17	ENSMUSG00000020486	2022-09-04	0.237185	0.80421	0.548387	0.432514	0.172214	1.83181e-17	8.7684e-12
408	Smooth muscle cells B	17	ENSMUSG00000018417	Myo1b	0.220375	0.614353	0.419355	0.525511	0.15038	1.94201e-15	9.29589e-10
409	Smooth muscle cells B	17	ENSMUSG00000018593	Sparc	0.259594	7.54985	1	0.259594	0.159192	2.95521e-16	1.41458e-10
410	Smooth muscle cells B	17	ENSMUSG00000019906	Lin7a	0.151958	0.216116	0.193548	0.785119	0.12266	7.30536e-13	3.49688e-07
411	Smooth muscle cells B	17	ENSMUSG00000020585	Laptm4a	0.159551	3.3234	1	0.159551	0.0723327	3.66827e-08	0.0175591
412	Smooth muscle cells B	17	ENSMUSG00000020928	Higd1b	0.569348	1.09602	0.645161	0.88249	0.470359	4.13639e-45	1.97998e-39
413	Smooth muscle cells B	17	ENSMUSG00000021388	Aspn	0.158676	0.491794	0.387097	0.409914	0.145685	5.29807e-15	2.53605e-09
414	Smooth muscle cells B	17	ENSMUSG00000022010	Tsc22d1	0.188271	1.38854	0.774194	0.243183	0.101018	7.57884e-11	3.62779e-05
415	Smooth muscle cells B	17	ENSMUSG00000024620	Pdgfrb	0.418577	1.29809	0.612903	0.682942	0.321624	2.64216e-31	1.26473e-25
416	Smooth muscle cells B	17	ENSMUSG00000025351	Cd63	0.150755	1.73804	0.774194	0.194725	0.0834145	3.34911e-09	0.00160313
417	Smooth muscle cells B	17	ENSMUSG00000025491	Ifitm1	0.410614	1.82197	0.806452	0.509162	0.351076	4.91824e-34	2.35424e-28
418	Smooth muscle cells B	17	ENSMUSG00000038530	Rgs4	0.279988	0.857779	0.516129	0.542478	0.262726	7.55406e-26	3.61593e-20
419	Smooth muscle cells B	17	ENSMUSG00000026678	Rgs5	0.532774	8.20365	1	0.532774	0.56052	1.6657e-53	7.97329e-48
420	Smooth muscle cells B	17	ENSMUSG00000028005	Gucy1b1	0.162977	0.776344	0.483871	0.336818	0.162308	1.51879e-16	7.27003e-11
421	Smooth muscle cells B	17	ENSMUSG00000028967	Errfi1	0.200044	1.00769	0.516129	0.387584	0.203334	2.39285e-20	1.1454e-14
422	Smooth muscle cells B	17	ENSMUSG00000029309	Sparcl1	0.166778	1.67947	0.645161	0.258506	0.0959167	2.26887e-10	0.000108605
423	Smooth muscle cells B	17	ENSMUSG00000029641	Rasl11a	0.185814	0.386532	0.290323	0.640026	0.122526	7.5184e-13	3.59886e-07
424	Smooth muscle cells B	17	ENSMUSG00000032766	Gng11	0.192649	1.79586	0.741935	0.259657	0.15143	1.55177e-15	7.42794e-10
425	Smooth muscle cells B	17	ENSMUSG00000029761	Cald1	0.239258	2.50451	0.806452	0.29668	0.146199	4.74636e-15	2.27196e-09
426	Smooth muscle cells B	17	ENSMUSG00000030247	Kcnj8	0.328472	1.60392	0.580645	0.565702	0.215373	1.83536e-21	8.78539e-16
427	Smooth muscle cells B	17	ENSMUSG00000030605	Mfge8	0.443328	2.74219	0.83871	0.528583	0.402236	8.8235e-39	4.22358e-33
428	Smooth muscle cells B	17	ENSMUSG00000031503	Col4a2	0.20227	1.05177	0.580645	0.348355	0.132593	8.71271e-14	4.17055e-08
429	Smooth muscle cells B	17	ENSMUSG00000040280	Ndufa4l2	0.705866	2.82621	0.903226	0.781494	0.636377	1.38163e-60	6.6135e-55
430	Smooth muscle cells B	17	ENSMUSG00000036256	Igfbp7	0.225105	6.22009	0.967742	0.232609	0.134817	5.41346e-14	2.59128e-08
431	Smooth muscle cells B	17	ENSMUSG00000033910	Gucy1a1	0.156134	0.846875	0.483871	0.322677	0.138175	2.63922e-14	1.26333e-08
432	Smooth muscle cells B	17	ENSMUSG00000042155	Klhl23	0.160932	0.593669	0.387097	0.415742	0.105399	2.95829e-11	1.41606e-05
433	Smooth muscle cells B	17	ENSMUSG00000050666	Vstm4	0.16848	0.382567	0.290323	0.580319	0.0920919	5.1658e-10	0.000247273
434	Smooth muscle cells B	17	ENSMUSG00000050234	Gja4	0.159378	0.4598	0.290323	0.548969	0.133266	7.54308e-14	3.61068e-08
435	Smooth muscle cells B	17	ENSMUSG00000048332	Lhfp	0.232726	0.898972	0.612903	0.37971	0.206732	1.15924e-20	5.54896e-15
436	Smooth muscle cells B	17	ENSMUSG00000042284	Itga1	0.200502	1.15413	0.580645	0.345309	0.129724	1.60982e-13	7.70581e-08
437	Smooth muscle cells B	17	ENSMUSG00000046275	Trarg1	0.27119	0.537782	0.322581	0.840689	0.188349	5.85219e-19	2.80129e-13
438	Smooth muscle cells B	17	ENSMUSG00000034164	Emid1	0.206937	0.573555	0.322581	0.641506	0.183757	1.55917e-18	7.46333e-13
439	Smooth muscle cells B	17	ENSMUSG00000034520	Gjc1	0.208679	0.605052	0.419355	0.49762	0.13209	9.70177e-14	4.64398e-08
440	Smooth muscle cells B	17	ENSMUSG00000030249	Abcc9	0.272041	0.948055	0.580645	0.468515	0.193712	1.86364e-19	8.92076e-14
441	Smooth muscle cells B	17	ENSMUSG00000031750	Il34	0.150221	0.268967	0.258065	0.582107	0.0891573	9.71614e-10	0.000465087
442	Smooth muscle cells B	17	ENSMUSG00000057098	Ebf1	0.238967	2.48942	0.774194	0.308665	0.2922	1.40681e-28	6.73403e-23
443	Smooth muscle cells B	17	ENSMUSG00000067818	Myl9	0.218946	2.62609	0.741935	0.295101	0.130667	1.31556e-13	6.29724e-08
444	Smooth muscle cells B	17	ENSMUSG00000069763	Tmem100	0.264364	0.620424	0.483871	0.546352	0.216843	1.3416e-21	6.42188e-16
445	Smooth muscle cells B	17	ENSMUSG00000074676	Foxs1	0.173014	0.179655	0.193548	0.893904	0.126941	2.92121e-13	1.39831e-07
446	Smooth muscle cells B	17	ENSMUSG00000028713	Cyp4b1	0.187897	0.86705	0.483871	0.388321	0.211903	3.84766e-21	1.84177e-15
447	Smooth muscle cells B	17	ENSMUSG00000032875	Arhgef17	0.162334	0.570163	0.290323	0.559152	0.111227	8.47022e-12	4.05447e-06
448	Smooth muscle cells B	17	ENSMUSG00000034842	Art3	0.156425	0.802201	0.516129	0.303074	0.0653887	1.6515e-07	0.0790529
449	Smooth muscle cells B	17	ENSMUSG00000001833	2022-09-07	0.173328	1.58194	0.677419	0.255865	0.123145	6.58494e-13	3.15204e-07
450	Smooth muscle cells B	17	ENSMUSG00000012428	Steap4	0.373046	1.01786	0.677419	0.550687	0.232124	5.15543e-23	2.46777e-17
451	Macrophage-B	18	ENSMUSG00000029925	Tbxas1	0.164549	0.260382	0.681818	0.241338	0.0737512	1.5087e-06	0.722177
452	Macrophage-B	18	ENSMUSG00000002985	Apoe	0.143836	0.554725	0.863636	0.166547	0.0434008	0.000225025	1
453	Macrophage-B	18	ENSMUSG00000004730	Adgre1	0.151763	0.704625	0.727273	0.208674	0.0560248	2.76718e-05	1
454	Macrophage-B	18	ENSMUSG00000021939	Ctsb	0.153054	2.76242	0.954545	0.160342	0.0660668	5.30501e-06	1
455	Macrophage-B	18	ENSMUSG00000038642	Ctss	0.182994	2.02665	0.954545	0.191708	0.0860158	2.04603e-07	0.0979383
456	Macrophage-B	18	ENSMUSG00000017009	Sdc4	0.146666	2.10914	1	0.146666	0.0337158	0.00114864	1
457	Macrophage-B	18	ENSMUSG00000021190	Lgmn	0.194288	1.54561	1	0.194288	0.0951243	4.66573e-08	0.0223337
458	Macrophage-B	18	ENSMUSG00000021423	Ly86	0.156137	0.706518	0.818182	0.190834	0.0668832	4.64046e-06	1
459	Macrophage-B	18	ENSMUSG00000022324	Matn2	0.232501	0.689621	0.727273	0.319689	0.097201	3.33263e-08	0.0159524
460	Macrophage-B	18	ENSMUSG00000024397	Aif1	0.163669	1.10468	0.909091	0.180036	0.050818	6.5479e-05	1
461	Macrophage-B	18	ENSMUSG00000024621	Csf1r	0.162395	0.827312	0.863636	0.188037	0.073	1.70568e-06	0.816463
462	Macrophage-B	18	ENSMUSG00000024672	Ms4a7	0.214881	0.919761	0.863636	0.24881	0.0659839	5.3776e-06	1
463	Macrophage-B	18	ENSMUSG00000024677	Ms4a6b	0.146345	0.697878	0.727273	0.201224	0.0641649	7.24748e-06	1
464	Macrophage-B	18	ENSMUSG00000025232	Hexa	0.157215	0.895344	0.863636	0.182039	0.0750796	1.21454e-06	0.581369
465	Macrophage-B	18	ENSMUSG00000026385	Dbi	0.160013	2.75139	1	0.160013	0.078112	7.40631e-07	0.354521
466	Macrophage-B	18	ENSMUSG00000026424	Gpr37l1	0.183694	0.456296	0.772727	0.237722	0.0622031	1.00029e-05	1
467	Macrophage-B	18	ENSMUSG00000026656	Fcgr2b	0.164869	0.57739	0.772727	0.21336	0.0594703	1.56804e-05	1
468	Macrophage-B	18	ENSMUSG00000026712	Mrc1	0.225284	0.705078	0.863636	0.260855	0.0992458	2.3932e-08	0.0114556
469	Macrophage-B	18	ENSMUSG00000008845	Cd163	0.161822	0.336807	0.636364	0.254292	0.0517956	5.56846e-05	1
470	Macrophage-B	18	ENSMUSG00000030560	Ctsc	0.191001	1.41734	0.954545	0.200096	0.0988797	2.53932e-08	0.0121551
471	Macrophage-B	18	ENSMUSG00000031425	Plp1	0.220257	0.74248	0.863636	0.255034	0.0868034	1.80024e-07	0.086173
472	Macrophage-B	18	ENSMUSG00000032060	Cryab	0.168481	0.988697	0.909091	0.185329	0.0639247	7.53898e-06	1
473	Macrophage-B	18	ENSMUSG00000032359	Ctsh	0.165064	0.883915	0.909091	0.18157	0.0790582	6.3479e-07	0.303857
474	Macrophage-B	18	ENSMUSG00000032554	Trf	0.146674	1.38236	0.909091	0.161342	0.0566469	2.49715e-05	1
475	Macrophage-B	18	ENSMUSG00000040759	Cmtm5	0.156455	0.16787	0.5	0.31291	0.0480029	0.000104492	1
476	Macrophage-B	18	ENSMUSG00000036570	Fxyd1	0.159292	1.43985	0.909091	0.175221	0.0712418	2.27353e-06	1
477	Macrophage-B	18	ENSMUSG00000036594	H2-Aa	0.170541	10.4002	1	0.170541	0.0914856	8.41734e-08	0.0402916
478	Macrophage-B	18	ENSMUSG00000073421	H2-Ab1	0.174605	13.0709	1	0.174605	0.0966985	3.61527e-08	0.0173053
479	Macrophage-B	18	ENSMUSG00000036169	Sostdc1	0.162581	0.37125	0.727273	0.223549	0.0439397	0.000205651	1
480	Macrophage-B	18	ENSMUSG00000040950	Mgl2	0.154503	0.642604	0.818182	0.188837	0.0720639	1.98761e-06	0.951416
481	Macrophage-B	18	ENSMUSG00000034810	Scn7a	0.169245	0.747816	0.863636	0.195968	0.0615113	1.12077e-05	1
482	Macrophage-B	18	ENSMUSG00000036887	C1qa	0.194776	6.80126	1	0.194776	0.103074	1.28806e-08	0.00616561
483	Macrophage-B	18	ENSMUSG00000036896	C1qc	0.188565	4.50467	1	0.188565	0.107195	6.61575e-09	0.00316679
484	Macrophage-B	18	ENSMUSG00000036905	C1qb	0.190779	6.08949	1	0.190779	0.101481	1.66681e-08	0.00797857
485	Macrophage-B	18	ENSMUSG00000024610	Cd74	0.159959	35.2781	1	0.159959	0.0858161	2.11354e-07	0.10117
486	Macrophage-B	18	ENSMUSG00000049130	C5ar1	0.21126	0.611567	0.909091	0.232386	0.0804115	5.09198e-07	0.24374
487	Macrophage-B	18	ENSMUSG00000047976	Kcna1	0.184013	0.47877	0.636364	0.289163	0.0618326	1.0631e-05	1
488	Macrophage-B	18	ENSMUSG00000051439	Cd14	0.151659	0.529026	0.636364	0.238322	0.0630544	8.69728e-06	1
489	Macrophage-B	18	ENSMUSG00000055541	Lair1	0.210438	0.411123	0.681818	0.308642	0.0807864	4.79043e-07	0.229305
490	Macrophage-B	18	ENSMUSG00000060586	H2-Eb1	0.175681	10.6189	1	0.175681	0.0910531	9.02924e-08	0.0432206
491	Macrophage-B	18	ENSMUSG00000058715	Fcer1g	0.151554	2.87218	0.954545	0.158771	0.0710268	2.35485e-06	1
492	Macrophage-B	18	ENSMUSG00000067261	Foxd3	0.151963	0.13435	0.454545	0.334318	0.0466967	0.000129857	1
493	Macrophage-B	18	ENSMUSG00000069662	Marcks	0.154622	1.44746	0.954545	0.161985	0.0871399	1.70446e-07	0.0815879
494	Macrophage-B	18	ENSMUSG00000008496	Pou2f2	0.165337	0.388343	0.681818	0.242494	0.0882784	1.41669e-07	0.0678131
495	Macrophage-B	18	ENSMUSG00000074361	C5ar2	0.148112	0.259598	0.454545	0.325846	0.0511059	6.24266e-05	1
496	Macrophage-B	18	ENSMUSG00000074622	Mafb	0.178188	0.636127	0.772727	0.230596	0.0889545	1.26936e-07	0.0607611
497	Macrophage-B	18	ENSMUSG00000039542	Ncam1	0.197078	0.760748	0.863636	0.228195	0.0747238	1.28717e-06	0.616135
498	Macrophage-B	18	ENSMUSG00000090164	BC035044	0.143063	0.222994	0.454545	0.314738	0.0605486	1.31305e-05	1
499	Macrophage-B	18	ENSMUSG00000036908	Unc93b1	0.156762	0.801546	0.909091	0.172438	0.0639183	7.54692e-06	1
500	Macrophage-B	18	ENSMUSG00000059498	Fcgr3	0.15022	0.859614	0.909091	0.165243	0.0668405	4.67305e-06	1
501	Unknown	19	ENSMUSG00000000308	Ckmt1	0.412513	1.19421	0.590909	0.698099	0.241038	3.145e-18	1.50543e-12
502	Unknown	19	ENSMUSG00000006345	Ggt1	0.404721	0.780102	0.5	0.809442	0.2494	8.26691e-19	3.95715e-13
503	Unknown	19	ENSMUSG00000011034	Slc5a1	0.411815	1.0739	0.5	0.823631	0.323222	6.27275e-24	3.0026e-18
504	Unknown	19	ENSMUSG00000053054	Adh6a	0.432575	1.02853	0.454545	0.951664	0.327103	3.37576e-24	1.61589e-18
505	Unknown	19	ENSMUSG00000035775	Krt20	0.573007	2.92004	0.636364	0.90044	0.452911	6.33673e-33	3.03323e-27
506	Unknown	19	ENSMUSG00000018569	Cldn7	0.523126	1.52599	0.590909	0.885289	0.373723	1.97502e-27	9.4539e-22
507	Unknown	19	ENSMUSG00000022555	Dgat1	0.461768	1.71766	0.727273	0.634931	0.337545	6.3731e-25	3.05064e-19
508	Unknown	19	ENSMUSG00000022824	Muc13	0.667315	2.60124	0.772727	0.863584	0.495104	7.45547e-36	3.56874e-30
509	Unknown	19	ENSMUSG00000023057	Fabp2	0.676127	16.2552	0.727273	0.929674	0.586031	3.56965e-42	1.7087e-36
510	Unknown	19	ENSMUSG00000049382	Krt8	0.612199	4.57557	0.863636	0.708863	0.400158	2.89829e-29	1.38734e-23
511	Unknown	19	ENSMUSG00000024503	Spink1	0.721402	6.2011	0.818182	0.881713	0.617883	2.16852e-44	1.03801e-38
512	Unknown	19	ENSMUSG00000024712	Rfk	0.430323	2.17627	0.681818	0.631141	0.272852	1.9519e-20	9.34324e-15
513	Unknown	19	ENSMUSG00000025467	Prap1	0.455731	1.59325	0.590909	0.771238	0.340517	3.96518e-25	1.89803e-19
514	Unknown	19	ENSMUSG00000026175	Vil1	0.414393	0.924706	0.5	0.828786	0.301526	2.00391e-22	9.59222e-17
515	Unknown	19	ENSMUSG00000026417	Pigr	0.421376	1.1216	0.5	0.842752	0.282281	4.33004e-21	2.07268e-15
516	Unknown	19	ENSMUSG00000000544	Gpa33	0.434109	0.316028	0.454545	0.955041	0.342101	3.07892e-25	1.4738e-19
517	Unknown	19	ENSMUSG00000028158	Mttp	0.385033	0.523598	0.5	0.770066	0.256622	2.60801e-19	1.24839e-13
518	Unknown	19	ENSMUSG00000028307	Aldob	0.603625	1.58222	0.681818	0.885317	0.403351	1.74028e-29	8.33029e-24
519	Unknown	19	ENSMUSG00000029161	Cgref1	0.388483	0.648128	0.5	0.776965	0.320474	9.72805e-24	4.65657e-18
520	Unknown	19	ENSMUSG00000029269	Sult1b1	0.393203	0.546389	0.454545	0.865046	0.215603	1.83379e-16	8.77786e-11
521	Unknown	19	ENSMUSG00000029727	Cyp3a13	0.430488	0.761599	0.545455	0.789228	0.223772	4.96738e-17	2.37776e-11
522	Unknown	19	ENSMUSG00000030017	Reg3g	0.489237	4.0079	0.545455	0.896935	0.344788	2.00486e-25	9.59673e-20
523	Unknown	19	ENSMUSG00000030364	Clec2h	0.534644	1.03895	0.590909	0.904783	0.372123	2.55002e-27	1.22063e-21
524	Unknown	19	ENSMUSG00000030587	2200002D01Rik	0.670764	6.35955	0.818182	0.819822	0.602992	2.35776e-43	1.1286e-37
525	Unknown	19	ENSMUSG00000055730	Ces2a	0.394743	0.583722	0.409091	0.964927	0.314482	2.53229e-23	1.21214e-17
526	Unknown	19	ENSMUSG00000031886	Ces2e	0.451639	0.51999	0.5	0.903278	0.300865	2.22709e-22	1.06605e-16
527	Unknown	19	ENSMUSG00000032081	Apoc3	0.567543	3.30736	0.681818	0.832397	0.413092	3.67191e-30	1.75765e-24
528	Unknown	19	ENSMUSG00000032083	Apoa1	0.721611	34.5407	0.818182	0.881969	0.557228	3.59489e-40	1.72078e-34
529	Unknown	19	ENSMUSG00000032454	Rbp2	0.753873	12.0304	0.863636	0.872906	0.662693	1.64257e-47	7.86254e-42
530	Unknown	19	ENSMUSG00000020609	Apob	0.570951	1.89224	0.636364	0.897208	0.423927	6.50467e-31	3.11362e-25
531	Unknown	19	ENSMUSG00000032978	Guca2b	0.563423	3.70218	0.636364	0.88538	0.418569	1.53091e-30	7.32809e-25
532	Unknown	19	ENSMUSG00000054999	Naaladl1	0.394042	0.420099	0.409091	0.963214	0.349471	9.49144e-26	4.54331e-20
533	Unknown	19	ENSMUSG00000021208	Ifi27l2b	0.380736	0.817581	0.5	0.761472	0.228593	2.29826e-17	1.10012e-11
534	Unknown	19	ENSMUSG00000039062	Anpep	0.407501	2.77204	0.545455	0.747086	0.369813	3.6875e-27	1.76511e-21
535	Unknown	19	ENSMUSG00000045394	Epcam	0.544652	2.91387	0.727273	0.748896	0.476312	1.50452e-34	7.20175e-29
536	Unknown	19	ENSMUSG00000050982	Apol10a	0.378116	0.695865	0.409091	0.924284	0.226421	3.2522e-17	1.55674e-11
537	Unknown	19	ENSMUSG00000046804	Phgr1	0.709693	2.05594	0.772727	0.918426	0.583893	5.0268e-42	2.4062e-36
538	Unknown	19	ENSMUSG00000053964	Lgals4	0.749901	4.34593	0.863636	0.868306	0.647563	1.86007e-46	8.90366e-41
539	Unknown	19	ENSMUSG00000054422	Fabp1	0.515726	3.44895	0.590909	0.872767	0.343898	2.31112e-25	1.10627e-19
540	Unknown	19	ENSMUSG00000091705	H2-Q2	0.490541	1.01772	0.545455	0.899326	0.353695	4.83543e-26	2.31459e-20
541	Unknown	19	ENSMUSG00000003271	Sult2b1	0.401264	0.760064	0.454545	0.88278	0.323282	6.21267e-24	2.97384e-18
542	Unknown	19	ENSMUSG00000025401	Myo1a	0.462378	0.909749	0.5	0.924755	0.354821	4.04013e-26	1.9339e-20
543	Unknown	19	ENSMUSG00000025497	Cdhr5	0.455279	1.2787	0.545455	0.834678	0.361374	1.41896e-26	6.79221e-21
544	Unknown	19	ENSMUSG00000049493	Pls1	0.534009	1.37061	0.590909	0.903708	0.430801	2.16895e-31	1.03822e-25
545	Unknown	19	ENSMUSG00000071356	Reg3b	0.492625	4.43545	0.545455	0.903146	0.347592	1.28126e-25	6.13305e-20
546	Unknown	19	ENSMUSG00000078439	Smim24	0.546895	2.87931	0.727273	0.751981	0.421703	9.27914e-31	4.44168e-25
547	Unknown	19	ENSMUSG00000029273	Sult1d1	0.381459	0.57238	0.409091	0.932456	0.276013	1.17815e-20	5.63948e-15
548	Unknown	19	ENSMUSG00000035041	Creb3l3	0.445246	0.750437	0.5	0.890492	0.286996	2.03932e-21	9.76168e-16
549	Unknown	19	ENSMUSG00000085042	Abhd11os	0.486834	0.935579	0.636364	0.765025	0.369184	4.07707e-27	1.95159e-21
550	Unknown	19	ENSMUSG00000096215	Smim22	0.443324	1.50753	0.636364	0.696652	0.260567	1.38868e-19	6.64725e-14
551	MENs	2	ENSMUSG00000001025	S100a6	0.289749	13.0065	0.974359	0.297374	0.700164	0	0
552	MENs	2	ENSMUSG00000001739	Cldn15	0.21867	0.567298	0.554206	0.394564	0.406057	0	0
553	MENs	2	ENSMUSG00000002980	Bcam	0.2276	1.22849	0.663518	0.34302	0.382749	0	0
554	MENs	2	ENSMUSG00000006360	Crip1	0.261786	29.1932	0.993702	0.263445	0.841905	0	0
555	MENs	2	ENSMUSG00000045545	Krt14	0.199939	0.263733	0.324786	0.615603	0.230605	0	0
556	MENs	2	ENSMUSG00000020911	Krt19	0.327618	2.24481	0.74359	0.44059	0.547373	0	0
557	MENs	2	ENSMUSG00000008540	Mgst1	0.227928	1.35336	0.671615	0.339372	0.472282	0	0
558	MENs	2	ENSMUSG00000009281	Rarres2	0.396915	13.3546	0.968961	0.40963	0.72894	0	0
559	MENs	2	ENSMUSG00000020467	Efemp1	0.243919	1.64804	0.709402	0.343837	0.443907	0	0
560	MENs	2	ENSMUSG00000022037	Clu	0.304664	1.55661	0.707602	0.430558	0.460137	0	0
561	MENs	2	ENSMUSG00000023043	Krt18	0.205838	0.536046	0.512821	0.401384	0.374809	0	0
562	MENs	2	ENSMUSG00000023046	Igfbp6	0.469623	15.3415	0.976608	0.480872	0.811893	0	0
563	MENs	2	ENSMUSG00000024164	C3	0.434183	9.51696	0.892488	0.486487	0.66703	0	0
564	MENs	2	ENSMUSG00000090231	Cfb	0.216232	0.431566	0.494827	0.436985	0.350218	0	0
565	MENs	2	ENSMUSG00000024659	Anxa1	0.17927	0.494879	0.518219	0.345936	0.34935	0	0
566	MENs	2	ENSMUSG00000025867	Cplx2	0.20812	0.833115	0.560954	0.37101	0.354481	0	0
567	MENs	2	ENSMUSG00000053897	Slc39a8	0.245316	0.310132	0.446244	0.549736	0.334475	0	0
568	MENs	2	ENSMUSG00000028583	Pdpn	0.195255	0.71897	0.561853	0.347519	0.366289	0	0
569	MENs	2	ENSMUSG00000028780	Sema3c	0.205635	0.507861	0.529465	0.388383	0.357844	0	0
570	MENs	2	ENSMUSG00000028871	Rspo1	0.340067	1.20705	0.643275	0.528649	0.50435	0	0
571	MENs	2	ENSMUSG00000029718	Pcolce	0.245734	2.04236	0.74314	0.330669	0.49991	0	0
572	MENs	2	ENSMUSG00000031517	Gpm6a	0.38303	2.19027	0.758884	0.504728	0.591282	0	0
573	MENs	2	ENSMUSG00000013584	Aldh1a2	0.238869	0.581665	0.547009	0.436682	0.366374	0	0
574	MENs	2	ENSMUSG00000032348	Gsta4	0.203922	0.436989	0.504723	0.404027	0.287331	0	0
575	MENs	2	ENSMUSG00000035413	Tmem98	0.222123	0.416594	0.51372	0.432382	0.325944	0	0
576	MENs	2	ENSMUSG00000060962	Dmkn	0.211835	0.525233	0.448043	0.4728	0.310956	0	0
577	MENs	2	ENSMUSG00000040170	Fmo2	0.293138	1.54566	0.668466	0.438524	0.465526	0	0
578	MENs	2	ENSMUSG00000032902	Slc16a1	0.202786	0.447216	0.521368	0.388951	0.339596	0	0
579	MENs	2	ENSMUSG00000042357	Gjb5	0.222579	0.224553	0.401709	0.554079	0.299455	0	0
580	MENs	2	ENSMUSG00000040605	Bace2	0.219406	0.413619	0.48583	0.45161	0.337614	0	0
581	MENs	2	ENSMUSG00000041559	Fmod	0.194982	0.206093	0.358974	0.543164	0.257194	0	0
582	MENs	2	ENSMUSG00000043110	Lrrn4	0.305113	0.50765	0.524966	0.581205	0.416251	0	0
583	MENs	2	ENSMUSG00000049436	Upk1b	0.335804	0.850141	0.611336	0.549295	0.469979	0	0
584	MENs	2	ENSMUSG00000042985	Upk3b	0.415998	2.65843	0.788574	0.527532	0.607656	0	0
585	MENs	2	ENSMUSG00000021994	Wnt5a	0.190899	0.440693	0.516419	0.369658	0.348066	0	0
586	MENs	2	ENSMUSG00000052957	Gas1	0.221433	1.37373	0.65677	0.337154	0.42182	0	0
587	MENs	2	ENSMUSG00000055172	C1ra	0.178873	0.534577	0.551057	0.324601	0.349461	0	0
588	MENs	2	ENSMUSG00000023039	Krt7	0.340896	1.14898	0.644175	0.529198	0.480704	0	0
589	MENs	2	ENSMUSG00000055653	Gpc3	0.268391	1.43916	0.695457	0.38592	0.475481	0	0
590	MENs	2	ENSMUSG00000063011	Msln	0.397761	3.09661	0.805218	0.493979	0.588844	0	0
591	MENs	2	ENSMUSG00000046056	Sbsn	0.176503	0.17664	0.325686	0.541943	0.234844	0	0
592	MENs	2	ENSMUSG00000018339	Gpx3	0.24941	3.03651	0.808367	0.308536	0.50976	0	0
593	MENs	2	ENSMUSG00000015093	Clic3	0.18672	0.140683	0.316239	0.59044	0.247089	0	0
594	MENs	2	ENSMUSG00000020473	Aebp1	0.381804	3.51321	0.795771	0.479791	0.600275	0	0
595	MENs	2	ENSMUSG00000027574	Nkain4	0.281807	1.13603	0.647773	0.435039	0.401013	0	0
596	MENs	2	ENSMUSG00000019929	Dcn	0.27347	13.7445	0.937922	0.291571	0.671509	0	0
597	MENs	2	ENSMUSG00000035930	Chst4	0.251966	0.395945	0.499325	0.504614	0.366931	0	0
598	MENs	2	ENSMUSG00000017002	Slpi	0.431452	36.22	0.992353	0.434776	0.836517	0	0
599	MENs	2	ENSMUSG00000016458	Wt1	0.206403	0.199041	0.388664	0.531057	0.291628	0	0
600	MENs	2	ENSMUSG00000078350	Smim1	0.203014	0.448882	0.520018	0.390398	0.341736	0	0
601	NENs	20	ENSMUSG00000002108	Nr1h3	0.192371	0.518877	0.315789	0.609174	0.0713508	8.80559e-06	1
602	NENs	20	ENSMUSG00000031849	Comp	0.238906	0.159938	0.263158	0.907842	0.123428	4.98551e-09	0.00238643
603	NENs	20	ENSMUSG00000003617	Cp	0.215226	0.386071	0.526316	0.408929	0.115721	1.49737e-08	0.00716752
604	NENs	20	ENSMUSG00000003849	Nqo1	0.187978	0.13568	0.315789	0.595264	0.0737672	6.20433e-06	1
605	NENs	20	ENSMUSG00000004771	Rab11a	0.1911	0.900194	0.684211	0.2793	0.113664	2.00864e-08	0.00961484
606	NENs	20	ENSMUSG00000009097	Tbx1	0.465492	0.354369	0.473684	0.982705	0.396304	8.99919e-26	4.30768e-20
607	NENs	20	ENSMUSG00000010175	Prox1	0.500433	0.543591	0.578947	0.864384	0.303548	4.28229e-20	2.04982e-14
608	NENs	20	ENSMUSG00000016024	Lbp	0.407606	0.621938	0.578947	0.704047	0.265734	8.86205e-18	4.24203e-12
609	NENs	20	ENSMUSG00000019890	Nts	0.457444	1.01891	0.526316	0.869144	0.30585	3.09569e-20	1.48183e-14
610	NENs	20	ENSMUSG00000020357	Flt4	0.322382	0.34911	0.421053	0.765656	0.161042	2.37222e-11	1.13552e-05
611	NENs	20	ENSMUSG00000024210	Ip6k3	0.210526	0.0503853	0.210526	1	0.187134	5.88319e-13	2.81613e-07
612	NENs	20	ENSMUSG00000026185	Igfbp5	0.28605	3.44803	0.526316	0.543496	0.184332	8.74739e-13	4.18715e-07
613	NENs	20	ENSMUSG00000056025	Clca3a1	0.288486	0.208969	0.421053	0.685154	0.125988	3.4614e-09	0.00165688
614	NENs	20	ENSMUSG00000032766	Gng11	0.190673	1.97179	0.684211	0.278676	0.122827	5.43171e-09	0.00260002
615	NENs	20	ENSMUSG00000030342	Cd9	0.206299	4.06446	0.842105	0.24498	0.098926	1.65563e-07	0.0792506
616	NENs	20	ENSMUSG00000030638	Sh3gl3	0.449335	0.361735	0.526316	0.853736	0.280289	1.13758e-18	5.4453e-13
617	NENs	20	ENSMUSG00000030787	Lyve1	0.443355	2.07464	0.578947	0.765794	0.305954	3.0508e-20	1.46034e-14
618	NENs	20	ENSMUSG00000042286	Stab1	0.194418	0.959017	0.473684	0.410439	0.0665747	1.76165e-05	1
619	NENs	20	ENSMUSG00000040488	Ltbp4	0.255567	2.24998	0.789474	0.323718	0.123736	4.77146e-09	0.00228398
620	NENs	20	ENSMUSG00000025597	Klhl4	0.284309	0.254562	0.421053	0.675234	0.118252	1.04328e-08	0.00499391
621	NENs	20	ENSMUSG00000037095	Lrg1	0.254202	0.894567	0.473684	0.536649	0.200955	8.32526e-14	3.98509e-08
622	NENs	20	ENSMUSG00000041378	Cldn5	0.436597	3.14494	0.684211	0.638103	0.282486	8.34429e-19	3.9942e-13
623	NENs	20	ENSMUSG00000037625	Cldn11	0.324406	0.347957	0.368421	0.88053	0.260147	1.94935e-17	9.33101e-12
624	NENs	20	ENSMUSG00000038296	Galnt18	0.276661	0.455461	0.526316	0.525656	0.146596	1.844e-10	8.82674e-05
625	NENs	20	ENSMUSG00000026822	Lcn2	0.513447	0.935657	0.578947	0.886864	0.419029	3.65804e-27	1.75101e-21
626	NENs	20	ENSMUSG00000060470	Adgrg3	0.214857	0.0699421	0.263158	0.816458	0.0779646	3.38069e-06	1
627	NENs	20	ENSMUSG00000045954	Cavin2	0.193122	0.384197	0.421053	0.458666	0.064353	2.43394e-05	1
628	NENs	20	ENSMUSG00000050447	Lypd6	0.189822	0.101467	0.263158	0.721324	0.0655311	2.05041e-05	1
629	NENs	20	ENSMUSG00000044921	Rassf9	0.193674	0.1669	0.368421	0.525688	0.0640628	2.53899e-05	1
630	NENs	20	ENSMUSG00000001493	Meox1	0.207661	0.299709	0.315789	0.657592	0.0971806	2.12661e-07	0.101795
631	NENs	20	ENSMUSG00000043342	Hoxd9	0.359381	0.238756	0.421053	0.853531	0.203323	5.95678e-14	2.85136e-08
632	NENs	20	ENSMUSG00000047714	Ppp1r2	0.20179	1.17172	0.736842	0.273858	0.144706	2.41228e-10	0.000115469
633	NENs	20	ENSMUSG00000042453	Reln	0.611439	1.35009	0.631579	0.968111	0.46737	4.01556e-30	1.92214e-24
634	NENs	20	ENSMUSG00000052861	Dnah6	0.275745	0.290897	0.368421	0.748452	0.137756	6.48004e-10	0.000310183
635	NENs	20	ENSMUSG00000056214	Pard6g	0.200887	0.430199	0.368421	0.545264	0.155138	5.48239e-11	2.62428e-05
636	NENs	20	ENSMUSG00000058396	Gpr182	0.273218	0.197724	0.421053	0.648894	0.111669	2.67134e-08	0.012787
637	NENs	20	ENSMUSG00000034684	Sema3f	0.245352	0.263803	0.421053	0.58271	0.0797609	2.60805e-06	1
638	NENs	20	ENSMUSG00000066705	Fxyd6	0.216246	1.75426	0.631579	0.34239	0.164401	1.47316e-11	7.05163e-06
639	NENs	20	ENSMUSG00000094686	Ccl21a	0.194544	0.124454	0.210526	0.924086	0.183723	9.53439e-13	4.56386e-07
640	NENs	20	ENSMUSG00000073599	Ecscr	0.204168	0.34134	0.473684	0.431022	0.0829125	1.65511e-06	0.792256
641	NENs	20	ENSMUSG00000074345	Tnfaip8l3	0.203411	0.101354	0.263158	0.772962	0.0824225	1.7763e-06	0.850269
642	NENs	20	ENSMUSG00000057530	Ece1	0.271285	1.52195	0.736842	0.368172	0.158225	3.53778e-11	1.69344e-05
643	NENs	20	ENSMUSG00000028713	Cyp4b1	0.229766	1.00565	0.526316	0.436555	0.184596	8.42586e-13	4.03324e-07
644	NENs	20	ENSMUSG00000031377	Bmx	0.231382	0.109019	0.315789	0.732711	0.1253	3.81812e-09	0.00182764
645	NENs	20	ENSMUSG00000062960	Kdr	0.199814	0.476266	0.473684	0.42183	0.100765	1.27186e-07	0.0608808
646	NENs	20	ENSMUSG00000054641	Mmrn1	0.872888	3.99306	0.894737	0.97558	0.791891	4.85865e-50	2.32571e-44
647	NENs	20	ENSMUSG00000079654	Prrt4	0.223617	0.0928375	0.315789	0.70812	0.0819178	1.91044e-06	0.914476
648	NENs	20	ENSMUSG00000090698	Apold1	0.297183	0.470539	0.526316	0.564647	0.154117	6.33702e-11	3.03337e-05
649	NENs	20	ENSMUSG00000094707	A830019P07Rik	0.191723	0.0877866	0.263158	0.728547	0.0574078	6.7083e-05	1
650	NENs	20	ENSMUSG00000098132	Rassf10	0.254454	0.108046	0.315789	0.805771	0.077725	3.4998e-06	1
651	Macrophage-C	21	ENSMUSG00000000290	Itgb2	0.384097	1.14922	0.941176	0.408103	0.355481	2.66916e-21	1.27766e-15
652	Macrophage-C	21	ENSMUSG00000001029	Icam2	0.294705	0.856001	0.764706	0.385384	0.236375	1.15404e-14	5.52407e-09
653	Macrophage-C	21	ENSMUSG00000001128	Cfp	0.532731	3.53125	0.941176	0.566027	0.465345	2.0507e-27	9.81617e-22
654	Macrophage-C	21	ENSMUSG00000001870	Ltbp1	0.272819	1.32354	0.705882	0.386494	0.16217	1.63101e-10	7.80721e-05
655	Macrophage-C	21	ENSMUSG00000004814	Ccl24	0.378724	0.414258	0.764706	0.495254	0.184516	9.12455e-12	4.36769e-06
656	Macrophage-C	21	ENSMUSG00000005373	Mlxipl	0.240951	0.0579253	0.411765	0.585167	0.0820422	5.49924e-06	1
657	Macrophage-C	21	ENSMUSG00000006014	Prg4	0.778176	3.28473	0.882353	0.881933	0.685689	1.08322e-39	5.18511e-34
658	Macrophage-C	21	ENSMUSG00000057729	Prtn3	0.734345	0.552247	0.764706	0.960298	0.623887	3.02988e-36	1.45032e-30
659	Macrophage-C	21	ENSMUSG00000040026	Saa3	0.707183	3.64367	0.823529	0.858722	0.506061	1.10994e-29	5.31298e-24
660	Macrophage-C	21	ENSMUSG00000010797	Wnt2	0.263725	0.234296	0.411765	0.640476	0.321285	2.13823e-19	1.02351e-13
661	Macrophage-C	21	ENSMUSG00000013974	Mcemp1	0.54527	0.497571	0.823529	0.662114	0.394715	1.74886e-23	8.37132e-18
662	Macrophage-C	21	ENSMUSG00000015340	Cybb	0.267168	0.817472	0.882353	0.30279	0.151744	6.27659e-10	0.000300444
663	Macrophage-C	21	ENSMUSG00000015854	Cd5l	0.894086	1.69714	0.941176	0.949966	0.801353	3.76311e-46	1.8013e-40
664	Macrophage-C	21	ENSMUSG00000018924	Alox15	0.767091	2.44452	0.823529	0.931467	0.645378	1.9196e-37	9.18863e-32
665	Macrophage-C	21	ENSMUSG00000019122	Ccl9	0.311227	1.09767	0.882353	0.352724	0.24784	2.64577e-15	1.26646e-09
666	Macrophage-C	21	ENSMUSG00000019872	Smpdl3a	0.241206	1.19314	0.882353	0.273367	0.151517	6.46413e-10	0.000309421
667	Macrophage-C	21	ENSMUSG00000020120	Plek	0.298884	0.461793	0.764706	0.390848	0.146843	1.18338e-09	0.000566455
668	Macrophage-C	21	ENSMUSG00000022122	Ednrb	0.35389	0.837092	0.941176	0.376008	0.235748	1.25076e-14	5.98707e-09
669	Macrophage-C	21	ENSMUSG00000024730	Ms4a8a	0.248567	0.155978	0.588235	0.422564	0.22675	3.97603e-14	1.90322e-08
670	Macrophage-C	21	ENSMUSG00000025330	Padi4	0.682255	0.415969	0.764706	0.89218	0.503362	1.56879e-29	7.5094e-24
671	Macrophage-C	21	ENSMUSG00000025534	Gusb	0.260385	0.478307	0.882353	0.295104	0.127459	1.45999e-08	0.00698859
672	Macrophage-C	21	ENSMUSG00000026357	Rgs18	0.302655	0.240469	0.705882	0.428761	0.166768	9.00687e-11	4.31135e-05
673	Macrophage-C	21	ENSMUSG00000028108	Ecm1	0.255383	1.03419	0.823529	0.310108	0.1658	1.02053e-10	4.88503e-05
674	Macrophage-C	21	ENSMUSG00000040264	Gbp2b	0.286089	0.213549	0.529412	0.540391	0.112864	9.74219e-08	0.0466333
675	Macrophage-C	21	ENSMUSG00000029373	Pf4	0.306387	6.73557	1	0.306387	0.140933	2.54368e-09	0.00121759
676	Macrophage-C	21	ENSMUSG00000096630	Vmn2r26	0.420681	0.163127	0.470588	0.893947	0.295021	6.20529e-18	2.97031e-12
677	Macrophage-C	21	ENSMUSG00000030142	Clec4e	0.591435	0.257121	0.764706	0.773415	0.418224	8.59913e-25	4.11618e-19
678	Macrophage-C	21	ENSMUSG00000030144	Clec4d	0.349883	0.32949	0.705882	0.495668	0.259019	6.297e-16	3.01421e-10
679	Macrophage-C	21	ENSMUSG00000030793	Pycard	0.302736	0.989376	0.882353	0.343101	0.227767	3.48864e-14	1.66992e-08
680	Macrophage-C	21	ENSMUSG00000031444	F10	0.723142	0.425723	0.823529	0.878101	0.676549	3.50502e-39	1.67776e-33
681	Macrophage-C	21	ENSMUSG00000040152	Thbs1	0.347267	0.910808	0.941176	0.368971	0.210506	3.21142e-13	1.53722e-07
682	Macrophage-C	21	ENSMUSG00000038860	Garnl3	0.242501	0.348476	0.588235	0.412252	0.144265	1.65235e-09	0.000790937
683	Macrophage-C	21	ENSMUSG00000026193	Fn1	0.553745	7.37156	0.941176	0.588354	0.614468	1.01497e-35	4.8584e-30
684	Macrophage-C	21	ENSMUSG00000046245	Pilra	0.247219	0.167721	0.705882	0.350227	0.104986	2.72094e-07	0.130244
685	Macrophage-C	21	ENSMUSG00000030786	Itgam	0.333813	0.0782894	0.470588	0.709352	0.12517	1.96547e-08	0.00940821
686	Macrophage-C	21	ENSMUSG00000055546	Timd4	0.498309	0.748437	0.647059	0.770113	0.338181	2.45109e-20	1.17327e-14
687	Macrophage-C	21	ENSMUSG00000060063	Alox5ap	0.320291	1.50842	0.941176	0.340309	0.235921	1.22322e-14	5.85522e-09
688	Macrophage-C	21	ENSMUSG00000021069	Pygl	0.340209	0.211822	0.764706	0.444889	0.151796	6.2344e-10	0.000298425
689	Macrophage-C	21	ENSMUSG00000058427	Cxcl2	0.335177	4.36623	0.705882	0.474834	0.199572	1.31182e-12	6.27936e-07
690	Macrophage-C	21	ENSMUSG00000059108	Ifitm6	0.389816	0.417238	0.823529	0.473347	0.289823	1.20873e-17	5.78587e-12
691	Macrophage-C	21	ENSMUSG00000026579	F5	0.697377	0.556454	0.705882	0.987951	0.628774	1.61797e-36	7.74479e-31
692	Macrophage-C	21	ENSMUSG00000069515	Lyz1	0.456861	2.12728	0.764706	0.597433	0.388011	4.12921e-23	1.97655e-17
693	Macrophage-C	21	ENSMUSG00000069516	Lyz2	0.519569	73.8449	1	0.519569	0.646	1.77224e-37	8.48328e-32
694	Macrophage-C	21	ENSMUSG00000069792	Wfdc17	0.568068	12.6727	0.941176	0.603573	0.457468	5.62746e-27	2.69372e-21
695	Macrophage-C	21	ENSMUSG00000020377	Ltc4s	0.367969	1.14667	0.882353	0.417031	0.202763	8.69916e-13	4.16406e-07
696	Macrophage-C	21	ENSMUSG00000063193	Cd300lb	0.249643	0.0822273	0.470588	0.53049	0.110301	1.36043e-07	0.0651201
697	Macrophage-C	21	ENSMUSG00000085761	4930455G09Rik	0.267092	0.136322	0.470588	0.567571	0.0949555	1.00967e-06	0.483304
698	Macrophage-C	21	ENSMUSG00000085327	Gm16104	0.254676	0.0548011	0.294118	0.865899	0.0739901	1.59027e-05	1
699	Macrophage-C	21	ENSMUSG00000092572	Serpinb10	0.451251	0.197346	0.588235	0.767127	0.381459	9.56145e-23	4.57682e-17
700	Macrophage-C	21	ENSMUSG00000108371	Gm38832	0.460398	0.129321	0.529412	0.869641	0.359044	1.69067e-21	8.09278e-16
701	Macrophage-B	3	ENSMUSG00000035352	Ccl12	0.194408	1.72397	0.623848	0.311627	0.292143	0	0
702	Macrophage-B	3	ENSMUSG00000002985	Apoe	0.181662	0.852048	0.788018	0.23053	0.29648	0	0
703	Macrophage-B	3	ENSMUSG00000004730	Adgre1	0.217695	0.943125	0.836982	0.260095	0.49187	0	0
704	Macrophage-B	3	ENSMUSG00000021939	Ctsb	0.201575	3.79496	0.987903	0.204044	0.430984	0	0
705	Macrophage-B	3	ENSMUSG00000038642	Ctss	0.237381	2.77714	0.975806	0.243267	0.554026	0	0
706	Macrophage-B	3	ENSMUSG00000017707	Serinc3	0.161902	2.39807	0.96947	0.167001	0.430537	0	0
707	Macrophage-B	3	ENSMUSG00000018774	Cd68	0.154353	0.591851	0.709677	0.217497	0.342956	0	0
708	Macrophage-B	3	ENSMUSG00000018920	Cxcl16	0.17094	0.552051	0.665899	0.256706	0.306899	0	0
709	Macrophage-B	3	ENSMUSG00000021190	Lgmn	0.202902	1.77036	0.942396	0.215305	0.427568	0	0
710	Macrophage-B	3	ENSMUSG00000021423	Ly86	0.181527	0.853754	0.824309	0.220218	0.404556	0	0
711	Macrophage-B	3	ENSMUSG00000024397	Aif1	0.18637	1.32477	0.902074	0.206601	0.30128	0	0
712	Macrophage-B	3	ENSMUSG00000024621	Csf1r	0.271638	1.45777	0.941244	0.288595	0.571259	0	0
713	Macrophage-B	3	ENSMUSG00000024672	Ms4a7	0.243344	1.12694	0.83871	0.290141	0.43295	0	0
714	Macrophage-B	3	ENSMUSG00000024677	Ms4a6b	0.167932	0.764682	0.778802	0.215628	0.462947	0	0
715	Macrophage-B	3	ENSMUSG00000026656	Fcgr2b	0.177378	0.681031	0.733871	0.241702	0.311105	0	0
716	Macrophage-B	3	ENSMUSG00000026712	Mrc1	0.208656	0.77799	0.742512	0.281014	0.459524	0	0
717	Macrophage-B	3	ENSMUSG00000015947	Fcgr1	0.172269	0.357313	0.542627	0.317473	0.329326	0	0
718	Macrophage-B	3	ENSMUSG00000029373	Pf4	0.15723	3.19135	0.903226	0.174076	0.330675	0	0
719	Macrophage-B	3	ENSMUSG00000030148	Clec4a2	0.178817	0.549566	0.6803	0.262851	0.313617	0	0
720	Macrophage-B	3	ENSMUSG00000030560	Ctsc	0.257898	2.08891	0.961406	0.268251	0.611406	0	0
721	Macrophage-B	3	ENSMUSG00000032359	Ctsh	0.205505	1.19193	0.90265	0.227669	0.485483	0	0
722	Macrophage-B	3	ENSMUSG00000032554	Trf	0.217323	2.2437	0.93318	0.232885	0.405765	0	0
723	Macrophage-B	3	ENSMUSG00000036594	H2-Aa	0.23532	16.1205	0.990207	0.237647	0.548946	0	0
724	Macrophage-B	3	ENSMUSG00000073421	H2-Ab1	0.243762	20.4698	0.99424	0.245174	0.584754	0	0
725	Macrophage-B	3	ENSMUSG00000040950	Mgl2	0.155923	0.836708	0.676267	0.230564	0.336651	0	0
726	Macrophage-B	3	ENSMUSG00000040552	C3ar1	0.198883	0.446108	0.606567	0.327883	0.376306	0	0
727	Macrophage-B	3	ENSMUSG00000037649	H2-DMa	0.19543	1.47751	0.910138	0.214726	0.439242	0	0
728	Macrophage-B	3	ENSMUSG00000036887	C1qa	0.260866	10.0334	0.998272	0.261317	0.586994	0	0
729	Macrophage-B	3	ENSMUSG00000036896	C1qc	0.254232	6.72396	0.995968	0.255261	0.598139	0	0
730	Macrophage-B	3	ENSMUSG00000036905	C1qb	0.246751	8.58395	0.997696	0.247321	0.566176	0	0
731	Macrophage-B	3	ENSMUSG00000024610	Cd74	0.231299	57.4326	0.999424	0.231433	0.538419	0	0
732	Macrophage-B	3	ENSMUSG00000049130	C5ar1	0.257842	0.956073	0.790899	0.326011	0.503201	0	0
733	Macrophage-B	3	ENSMUSG00000049988	Lrrc25	0.162246	0.398964	0.59735	0.27161	0.37231	0	0
734	Macrophage-B	3	ENSMUSG00000048779	P2ry6	0.167586	0.315997	0.529378	0.316572	0.322126	0	0
735	Macrophage-B	3	ENSMUSG00000049037	Clec4a1	0.191604	0.515222	0.631336	0.30349	0.326786	0	0
736	Macrophage-B	3	ENSMUSG00000051439	Cd14	0.170367	0.573883	0.672235	0.253434	0.428408	0	0
737	Macrophage-B	3	ENSMUSG00000052160	Pld4	0.198816	0.738429	0.785714	0.253038	0.445211	0	0
738	Macrophage-B	3	ENSMUSG00000055541	Lair1	0.183999	0.4169	0.589862	0.311936	0.391657	0	0
739	Macrophage-B	3	ENSMUSG00000055435	Maf	0.19161	1.08304	0.843318	0.22721	0.474189	0	0
740	Macrophage-B	3	ENSMUSG00000060586	H2-Eb1	0.236997	15.9536	0.991359	0.239063	0.52025	0	0
741	Macrophage-B	3	ENSMUSG00000022150	Dab2	0.156592	0.719069	0.745392	0.21008	0.234551	0	0
742	Macrophage-B	3	ENSMUSG00000059089	Fcgr4	0.154556	0.370275	0.516705	0.299118	0.257924	0	0
743	Macrophage-B	3	ENSMUSG00000058715	Fcer1g	0.192895	3.75391	0.991359	0.194577	0.43118	0	0
744	Macrophage-B	3	ENSMUSG00000015852	Fcrls	0.164574	0.720024	0.68318	0.240894	0.322235	0	0
745	Macrophage-B	3	ENSMUSG00000073412	Lst1	0.192935	0.909292	0.815092	0.236703	0.28427	0	0
746	Macrophage-B	3	ENSMUSG00000074622	Mafb	0.198757	0.765493	0.749424	0.265212	0.516914	0	0
747	Macrophage-B	3	ENSMUSG00000079547	H2-DMb1	0.218191	1.12511	0.841014	0.259438	0.454392	0	0
748	Macrophage-B	3	ENSMUSG00000070873	Lilra5	0.162659	0.420378	0.582949	0.279027	0.317271	0	0
749	Macrophage-B	3	ENSMUSG00000036908	Unc93b1	0.227602	1.29151	0.919931	0.247412	0.510786	0	0
750	Macrophage-B	3	ENSMUSG00000059498	Fcgr3	0.238575	1.52864	0.933756	0.255501	0.514873	0	0
751	Neuroglia	4	ENSMUSG00000014846	Tppp3	0.178879	2.53772	0.740964	0.241413	0.455188	0	0
752	Neuroglia	4	ENSMUSG00000018593	Sparc	0.203438	6.42222	0.885542	0.229732	0.380878	0	0
753	Neuroglia	4	ENSMUSG00000018822	Sfrp5	0.160902	0.371581	0.289759	0.555295	0.233743	0	0
754	Neuroglia	4	ENSMUSG00000019874	Fabp7	0.160587	0.700064	0.437349	0.367181	0.31219	0	0
755	Neuroglia	4	ENSMUSG00000020774	Aspa	0.19071	0.650112	0.436747	0.43666	0.331977	0	0
756	Neuroglia	4	ENSMUSG00000022048	Dpysl2	0.119195	2.01431	0.670482	0.177776	0.168417	6.98947e-246	3.34568e-240
757	Neuroglia	4	ENSMUSG00000022103	Gfra2	0.141198	0.458778	0.363855	0.388062	0.265494	0	0
758	Neuroglia	4	ENSMUSG00000022324	Matn2	0.175082	0.834928	0.472892	0.370238	0.367007	0	0
759	Neuroglia	4	ENSMUSG00000022548	Apod	0.225511	1.1768	0.462651	0.487433	0.336024	0	0
760	Neuroglia	4	ENSMUSG00000024665	Fads2	0.149356	0.628777	0.416867	0.358281	0.22077	0	0
761	Neuroglia	4	ENSMUSG00000025203	Scd2	0.118242	0.715164	0.427108	0.276844	0.188821	3.75027e-277	1.79516e-271
762	Neuroglia	4	ENSMUSG00000025780	Itih5	0.192078	0.960163	0.526506	0.364816	0.382292	0	0
763	Neuroglia	4	ENSMUSG00000026249	Serpine2	0.179904	1.17441	0.58253	0.308832	0.330994	0	0
764	Neuroglia	4	ENSMUSG00000026385	Dbi	0.303097	7.27293	0.906627	0.334313	0.575006	0	0
765	Neuroglia	4	ENSMUSG00000026424	Gpr37l1	0.281333	1.14922	0.578916	0.485966	0.461331	0	0
766	Neuroglia	4	ENSMUSG00000027712	Anxa5	0.118274	1.63726	0.645783	0.183149	0.144978	1.89446e-210	9.06829e-205
767	Neuroglia	4	ENSMUSG00000028128	F3	0.128142	0.546255	0.383735	0.333933	0.218318	4.44659081257122e-323	2.12846741061672e-317
768	Neuroglia	4	ENSMUSG00000030342	Cd9	0.178142	3.5607	0.803614	0.221676	0.356756	0	0
769	Neuroglia	4	ENSMUSG00000031425	Plp1	0.328161	1.72597	0.668072	0.491206	0.536603	0	0
770	Neuroglia	4	ENSMUSG00000031548	Sfrp1	0.194323	1.03481	0.521687	0.37249	0.332995	0	0
771	Neuroglia	4	ENSMUSG00000032060	Cryab	0.261523	2.32926	0.736747	0.35497	0.414397	0	0
772	Neuroglia	4	ENSMUSG00000033208	S100b	0.248611	0.8358	0.513855	0.483815	0.37454	0	0
773	Neuroglia	4	ENSMUSG00000040759	Cmtm5	0.120774	0.283685	0.256024	0.471727	0.209305	0	2.82319e-303
774	Neuroglia	4	ENSMUSG00000040724	Kcna2	0.127514	0.393616	0.309036	0.412617	0.225724	0	0
775	Neuroglia	4	ENSMUSG00000036570	Fxyd1	0.328367	4.11875	0.842771	0.389628	0.606586	0	0
776	Neuroglia	4	ENSMUSG00000033006	Sox10	0.127232	0.31518	0.270482	0.470392	0.208763	4.15977e-308	1.99117e-302
777	Neuroglia	4	ENSMUSG00000032679	Cd59a	0.199049	0.827291	0.509639	0.390569	0.302014	0	0
778	Neuroglia	4	ENSMUSG00000036169	Sostdc1	0.299544	1.18017	0.541566	0.553107	0.437328	0	0
779	Neuroglia	4	ENSMUSG00000042116	Vwa1	0.167871	0.718933	0.412651	0.406812	0.253561	0	0
780	Neuroglia	4	ENSMUSG00000034810	Scn7a	0.370842	2.48523	0.749398	0.494853	0.59127	0	0
781	Neuroglia	4	ENSMUSG00000025856	Pdgfa	0.173636	0.96798	0.521687	0.332837	0.283197	0	0
782	Neuroglia	4	ENSMUSG00000069601	Ank3	0.142233	0.413521	0.343373	0.414222	0.251737	0	0
783	Neuroglia	4	ENSMUSG00000041607	Mbp	0.173135	0.54128	0.374699	0.462065	0.263284	0	0
784	Neuroglia	4	ENSMUSG00000059857	Ntng1	0.127966	0.265607	0.221687	0.577237	0.194209	1.77621e-285	8.50224e-280
785	Neuroglia	4	ENSMUSG00000038668	Lpar1	0.168739	0.732963	0.471687	0.357735	0.318444	0	0
786	Neuroglia	4	ENSMUSG00000047976	Kcna1	0.275271	1.01501	0.526506	0.522827	0.446919	0	0
787	Neuroglia	4	ENSMUSG00000031342	Gpm6b	0.1659	0.500117	0.371687	0.446344	0.265051	0	0
788	Neuroglia	4	ENSMUSG00000020926	Adam11	0.151689	0.530557	0.345181	0.439449	0.239491	0	0
789	Neuroglia	4	ENSMUSG00000032268	Tmprss5	0.194344	0.541501	0.370482	0.52457	0.288266	0	0
790	Neuroglia	4	ENSMUSG00000032332	Col12a1	0.124798	0.476214	0.293976	0.424516	0.19493	1.35794e-286	6.50009e-281
791	Neuroglia	4	ENSMUSG00000027750	Postn	0.135682	0.740497	0.437952	0.309811	0.264016	0	0
792	Neuroglia	4	ENSMUSG00000057969	Sema3b	0.164929	0.525741	0.371084	0.444452	0.260352	0	0
793	Neuroglia	4	ENSMUSG00000030701	Plekhb1	0.159884	0.56068	0.403614	0.39613	0.264342	0	0
794	Neuroglia	4	ENSMUSG00000025964	Adam23	0.152555	0.362264	0.286747	0.532018	0.209786	0	5.00048e-304
795	Neuroglia	4	ENSMUSG00000053279	Aldh1a1	0.125476	0.63686	0.394578	0.318	0.199389	1.6553e-293	7.92348e-288
796	Neuroglia	4	ENSMUSG00000047216	Cdh19	0.196662	0.470504	0.359036	0.547749	0.288725	0	0
797	Neuroglia	4	ENSMUSG00000029838	Ptn	0.12115	1.21926	0.579518	0.209054	0.238046	0	0
798	Neuroglia	4	ENSMUSG00000034842	Art3	0.21131	1.05098	0.566867	0.372768	0.42854	0	0
799	Neuroglia	4	ENSMUSG00000039542	Ncam1	0.281302	1.72957	0.657229	0.428013	0.500875	0	0
800	Neuroglia	4	ENSMUSG00000097789	Gm2115	0.122246	0.211394	0.21506	0.568427	0.164917	1.47203e-240	7.04623e-235
801	Vascular endothelium	5	ENSMUSG00000001946	Esam	0.258554	1.21097	0.60793	0.425303	0.311896	0	0
802	Vascular endothelium	5	ENSMUSG00000004655	Aqp1	0.487934	7.46444	0.794053	0.614486	0.508128	0	0
803	Vascular endothelium	5	ENSMUSG00000026814	Eng	0.204704	1.01758	0.577093	0.354717	0.305827	0	0
804	Vascular endothelium	5	ENSMUSG00000017309	Cd300lg	0.16631	0.388666	0.348018	0.477878	0.262374	6.88884e-293	3.29751e-287
805	Vascular endothelium	5	ENSMUSG00000020577	Tspan13	0.235579	1.6718	0.6663	0.353564	0.386508	0	0
806	Vascular endothelium	5	ENSMUSG00000020846	Rflnb	0.217862	0.56474	0.422907	0.515154	0.269362	3.94229e-301	1.88707e-295
807	Vascular endothelium	5	ENSMUSG00000021367	Edn1	0.210084	0.553041	0.373348	0.562703	0.248265	2.47693e-276	1.18564e-270
808	Vascular endothelium	5	ENSMUSG00000044258	Ctla2a	0.238432	1.10372	0.546256	0.436484	0.401543	0	0
809	Vascular endothelium	5	ENSMUSG00000022018	Rgcc	0.235163	1.45258	0.55837	0.421159	0.341489	0	0
810	Vascular endothelium	5	ENSMUSG00000075602	Ly6a	0.301746	2.96315	0.773128	0.390293	0.5363	0	0
811	Vascular endothelium	5	ENSMUSG00000022661	Cd200	0.211105	1.46666	0.625551	0.33747	0.205056	2.54948e-226	1.22037e-220
812	Vascular endothelium	5	ENSMUSG00000024140	Epas1	0.222953	0.957679	0.55837	0.399292	0.367831	0	0
813	Vascular endothelium	5	ENSMUSG00000024395	Lims2	0.187123	0.917248	0.539648	0.34675	0.238202	1.35938e-264	6.50702e-259
814	Vascular endothelium	5	ENSMUSG00000025608	Podxl	0.176371	0.590476	0.428414	0.411683	0.26237	6.96654e-293	3.3347e-287
815	Vascular endothelium	5	ENSMUSG00000025902	Sox17	0.196507	0.300745	0.296256	0.663304	0.205866	3.00751e-227	1.43962e-221
816	Vascular endothelium	5	ENSMUSG00000062515	Fabp4	0.513452	10.2101	0.89978	0.570642	0.677065	0	0
817	Vascular endothelium	5	ENSMUSG00000027800	Tm4sf1	0.178726	1.63726	0.657489	0.271831	0.192297	9.56981e-212	4.58082e-206
818	Vascular endothelium	5	ENSMUSG00000028427	Aqp7	0.192232	0.433642	0.375551	0.511867	0.280449	2.90273802489717e-314	0
819	Vascular endothelium	5	ENSMUSG00000029309	Sparcl1	0.209174	1.97459	0.715859	0.2922	0.348685	0	0
820	Vascular endothelium	5	ENSMUSG00000029648	Flt1	0.320789	0.703551	0.471366	0.680552	0.366125	0	0
821	Vascular endothelium	5	ENSMUSG00000032766	Gng11	0.16587	1.75978	0.648678	0.255705	0.347121	0	0
822	Vascular endothelium	5	ENSMUSG00000031871	Cdh5	0.370202	1.40017	0.659692	0.561175	0.510929	0	0
823	Vascular endothelium	5	ENSMUSG00000036144	Meox2	0.162654	0.310776	0.332599	0.489039	0.23057	9.98602e-256	4.78005e-250
824	Vascular endothelium	5	ENSMUSG00000035686	Thrsp	0.207127	0.497503	0.378855	0.546718	0.267324	1.00742e-298	4.82226e-293
825	Vascular endothelium	5	ENSMUSG00000036256	Igfbp7	0.174176	5.45304	0.827093	0.210588	0.19792	3.70645e-218	1.77418e-212
826	Vascular endothelium	5	ENSMUSG00000039167	Adgrl4	0.255447	0.456473	0.386564	0.660815	0.277055	3.0896611260693e-310	1.47894e-304
827	Vascular endothelium	5	ENSMUSG00000033191	Tie1	0.162569	0.443392	0.407489	0.398954	0.292578	0	0
828	Vascular endothelium	5	ENSMUSG00000034911	Ushbp1	0.212839	0.329046	0.310573	0.68531	0.213904	1.77099e-236	8.47727e-231
829	Vascular endothelium	5	ENSMUSG00000045377	Tmem88	0.183504	0.429198	0.385463	0.476061	0.241994	5.19584e-269	2.48711e-263
830	Vascular endothelium	5	ENSMUSG00000046916	Myct1	0.213851	0.377076	0.368943	0.579631	0.259399	2.17708e-289	1.04211e-283
831	Vascular endothelium	5	ENSMUSG00000045092	S1pr1	0.283565	0.870017	0.546256	0.519107	0.386182	0	0
832	Vascular endothelium	5	ENSMUSG00000044562	Rasip1	0.180316	0.428481	0.372247	0.4844	0.257459	4.14519e-287	1.98419e-281
833	Vascular endothelium	5	ENSMUSG00000045534	Kcna5	0.215877	0.328837	0.34141	0.632312	0.25135	6.07137e-280	2.90621e-274
834	Vascular endothelium	5	ENSMUSG00000020717	Pecam1	0.363026	1.39527	0.672907	0.539489	0.51859	0	0
835	Vascular endothelium	5	ENSMUSG00000061353	Cxcl12	0.4338	2.17719	0.628855	0.689826	0.48367	0	0
836	Vascular endothelium	5	ENSMUSG00000058254	Tspan7	0.220655	0.849803	0.513216	0.429946	0.225025	2.63454e-249	1.26108e-243
837	Vascular endothelium	5	ENSMUSG00000063415	Cyp26b1	0.20947	0.985706	0.487885	0.429342	0.319612	0	0
838	Vascular endothelium	5	ENSMUSG00000002944	Cd36	0.354424	2.88376	0.796256	0.445113	0.471802	0	0
839	Vascular endothelium	5	ENSMUSG00000037936	Scarb1	0.22635	0.682442	0.465859	0.485876	0.28595	8.31512481950818e-321	3.98023405785326e-315
840	Vascular endothelium	5	ENSMUSG00000068079	Tcf15	0.254579	0.586331	0.430617	0.591197	0.314352	0	0
841	Vascular endothelium	5	ENSMUSG00000020154	Ptprb	0.364337	0.951065	0.544053	0.669672	0.422873	0	0
842	Vascular endothelium	5	ENSMUSG00000027435	Cd93	0.232696	0.807835	0.502203	0.463351	0.250003	2.29313e-278	1.09766e-272
843	Vascular endothelium	5	ENSMUSG00000026921	Egfl7	0.273986	0.968179	0.581498	0.471173	0.411772	0	0
844	Vascular endothelium	5	ENSMUSG00000001930	Vwf	0.227934	0.508051	0.356828	0.638778	0.222595	1.69667e-246	8.1215e-241
845	Vascular endothelium	5	ENSMUSG00000032125	Robo4	0.183719	0.354645	0.3337	0.550551	0.245415	5.30473e-273	2.53923e-267
846	Vascular endothelium	5	ENSMUSG00000041445	Mmrn2	0.162289	0.48826	0.400881	0.40483	0.278524	5.59965127401604e-312	2.68041e-306
847	Vascular endothelium	5	ENSMUSG00000062960	Kdr	0.153658	0.449844	0.381057	0.403242	0.269803	1.18867e-301	5.68986e-296
848	Vascular endothelium	5	ENSMUSG00000056492	Adgrf5	0.300498	0.867086	0.531938	0.564911	0.356087	0	0
849	Vascular endothelium	5	ENSMUSG00000054690	Emcn	0.220505	0.759001	0.501101	0.44004	0.370754	0	0
850	Vascular endothelium	5	ENSMUSG00000068036	Afdn	0.187537	0.577987	0.45815	0.409335	0.234309	4.57226e-260	2.18862e-254
851	Smooth muscle cells	6	ENSMUSG00000001270	Ckb	0.0445124	1.1173	0.287371	0.154895	0.00605554	2.27797e-07	0.10904
852	Smooth muscle cells	6	ENSMUSG00000001349	Cnn1	0.0426328	0.417959	0.113402	0.375943	0.0378095	1.75361e-38	8.39406e-33
853	Smooth muscle cells	6	ENSMUSG00000005611	Mrvi1	0.0468642	0.266412	0.108247	0.432936	0.0388814	1.56253e-39	7.47941e-34
854	Smooth muscle cells	6	ENSMUSG00000005672	Kit	0.0963151	0.858582	0.19201	0.501614	0.109503	1.46253e-109	7.00073e-104
855	Smooth muscle cells	6	ENSMUSG00000020439	Smtn	0.142794	1.62848	0.328608	0.434541	0.162772	1.14308e-163	5.47165e-158
856	Smooth muscle cells	6	ENSMUSG00000020719	Ddx5	0.0768407	2.68077	0.550258	0.139645	0.0436126	3.59008e-44	1.71848e-38
857	Smooth muscle cells	6	ENSMUSG00000024661	Fth1	0.0490474	5.51921	0.752577	0.0651726	0.0509103	2.441e-51	1.16844e-45
858	Smooth muscle cells	6	ENSMUSG00000026208	Des	0.0914487	1.50274	0.322165	0.283857	0.0726405	8.74452e-73	4.18577e-67
859	Smooth muscle cells	6	ENSMUSG00000026421	Csrp1	0.0445869	1.0334	0.247423	0.180206	0.00740595	1.04118e-08	0.00498384
860	Smooth muscle cells	6	ENSMUSG00000028461	Ccdc107	0.0659498	0.66387	0.207474	0.31787	0.0445157	4.66697e-45	2.23396e-39
861	Smooth muscle cells	6	ENSMUSG00000028464	Tpm2	0.125711	2.41787	0.434278	0.289471	0.106577	1.26895e-106	6.07413e-101
862	Smooth muscle cells	6	ENSMUSG00000032366	Tpm1	0.0867916	1.88286	0.353093	0.245804	0.0664357	1.208e-66	5.78237e-61
863	Smooth muscle cells	6	ENSMUSG00000029309	Sparcl1	0.0558729	1.12541	0.292526	0.191002	0.0408733	1.74419e-41	8.349e-36
864	Smooth muscle cells	6	ENSMUSG00000030409	Dmpk	0.10843	0.969118	0.266753	0.40648	0.126356	1.48952e-126	7.12993e-121
865	Smooth muscle cells	6	ENSMUSG00000031075	Ano1	0.0625155	0.586195	0.154639	0.404267	0.034875	1.31055e-35	6.27325e-30
866	Smooth muscle cells	6	ENSMUSG00000031328	Flna	0.133842	2.3704	0.414948	0.32255	0.148404	5.86623e-149	2.80801e-143
867	Smooth muscle cells	6	ENSMUSG00000031586	Rbpms	0.0756909	0.879586	0.255155	0.296647	0.0889659	5.22957e-89	2.50326e-83
868	Smooth muscle cells	6	ENSMUSG00000031842	Pde4c	0.0602068	0.324573	0.0927835	0.648896	0.0649701	3.39169e-65	1.62351e-59
869	Smooth muscle cells	6	ENSMUSG00000032085	Tagln	0.0683075	0.957492	0.221649	0.308178	0.0769982	4.17836e-77	2.00007e-71
870	Smooth muscle cells	6	ENSMUSG00000035967	Ints6l	0.0907694	0.68046	0.197165	0.460373	0.102879	6.49742e-103	3.11014e-97
871	Smooth muscle cells	6	ENSMUSG00000035783	Acta2	0.132786	2.95658	0.420103	0.31608	0.130154	2.12957e-130	1.01937e-124
872	Smooth muscle cells	6	ENSMUSG00000037126	Psd	0.0480243	0.236609	0.0863402	0.556222	0.0426213	3.3694e-43	1.61284e-37
873	Smooth muscle cells	6	ENSMUSG00000041741	Pde3a	0.0621046	0.76258	0.217784	0.285167	0.0903231	2.3189e-90	1.11e-84
874	Smooth muscle cells	6	ENSMUSG00000026463	Atp2b4	0.0429663	0.443548	0.14433	0.297695	0.0353618	4.3743e-36	2.09386e-30
875	Smooth muscle cells	6	ENSMUSG00000037852	Cpe	0.0813383	1.37328	0.300258	0.270895	0.0593824	1.11044e-59	5.31541e-54
876	Smooth muscle cells	6	ENSMUSG00000055065	Ddx17	0.0570016	0.875106	0.233247	0.244383	0.0643455	1.40437e-64	6.72236e-59
877	Smooth muscle cells	6	ENSMUSG00000049422	Chchd10	0.0422922	0.696638	0.204897	0.206407	0.0331374	6.57677e-34	3.14813e-28
878	Smooth muscle cells	6	ENSMUSG00000059430	Actg2	0.0940623	1.55645	0.274485	0.342687	0.0798531	6.11725e-80	2.92817e-74
879	Smooth muscle cells	6	ENSMUSG00000064339	mt-Rnr2	0.0835848	7.78878	0.85567	0.0976834	0.00181942	0.00457582	1
880	Smooth muscle cells	6	ENSMUSG00000064341	mt-Nd1	0.126629	24.5141	0.988402	0.128114	0.115135	3.15666e-115	1.51101e-109
881	Smooth muscle cells	6	ENSMUSG00000064345	mt-Nd2	0.114183	6.69254	0.814433	0.140199	0.0378359	1.65239e-38	7.90958e-33
882	Smooth muscle cells	6	ENSMUSG00000064351	mt-Co1	0.0431533	1.92976	0.445876	0.0967832	0.000810646	0.0584273	1
883	Smooth muscle cells	6	ENSMUSG00000064357	mt-Atp6	0.0843056	3.65525	0.652062	0.129291	0.0270231	6.27767e-28	3.00496e-22
884	Smooth muscle cells	6	ENSMUSG00000064358	mt-Co3	0.097963	5.75204	0.751289	0.130393	0.0382363	6.69697e-39	3.20566e-33
885	Smooth muscle cells	6	ENSMUSG00000064363	mt-Nd4	0.13405	15.4239	0.958763	0.139815	0.113605	1.0951e-113	5.24196e-108
886	Smooth muscle cells	6	ENSMUSG00000064368	mt-Nd6	0.0590894	1.68677	0.398196	0.148393	0.0148854	4.62717e-16	2.21491e-10
887	Smooth muscle cells	6	ENSMUSG00000064370	mt-Cytb	0.133656	30.3826	0.992268	0.134697	0.152264	6.67102e-153	3.19324e-147
888	Smooth muscle cells	6	ENSMUSG00000067818	Myl9	0.107251	2.36822	0.393041	0.272876	0.103688	1.00272e-103	4.79978e-98
889	Smooth muscle cells	6	ENSMUSG00000018830	Myh11	0.111197	1.37856	0.282216	0.394013	0.117204	2.59746e-117	1.24334e-111
890	Smooth muscle cells	6	ENSMUSG00000021134	Srsf5	0.048878	0.959626	0.270619	0.180616	0.0255986	1.54965e-26	7.41777e-21
891	Smooth muscle cells	6	ENSMUSG00000004151	Etv1	0.0547502	0.709955	0.162371	0.337191	0.0486313	4.24297e-49	2.031e-43
892	Smooth muscle cells	6	ENSMUSG00000017002	Slpi	0.0434212	3.67968	0.578608	0.0750441	0.00326949	0.000143789	1
893	Smooth muscle cells	6	ENSMUSG00000055632	Hmcn2	0.105138	1.26891	0.319588	0.328982	0.154057	9.78383e-155	4.68326e-149
894	Smooth muscle cells	6	ENSMUSG00000034275	Igsf9b	0.144568	1.55636	0.29768	0.48565	0.149962	1.50206e-150	7.18998e-145
895	Smooth muscle cells	6	ENSMUSG00000024597	Slc12a2	0.0492256	0.565788	0.16366	0.30078	0.053014	2.08169e-53	9.96449e-48
896	Smooth muscle cells	6	ENSMUSG00000090841	Myl6	0.100854	4.35809	0.639175	0.157788	0.0264424	2.31991e-27	1.11048e-21
897	Smooth muscle cells	6	ENSMUSG00000092341	Malat1	0.0614626	41.9289	0.882732	0.0696277	0.0031794	0.000177697	1
898	Smooth muscle cells	6	ENSMUSG00000093674	Rpl41	0.0485749	4.07797	0.686856	0.0707207	0.00846735	9.30107e-10	0.000445218
899	Smooth muscle cells	6	ENSMUSG00000097971	Gm26917	0.10633	23.9216	0.858247	0.123892	0.175754	4.9005e-177	2.34574e-171
900	Smooth muscle cells	6	ENSMUSG00000101939	Gm28438	0.0712582	2.24321	0.467784	0.152332	0.0124652	1.08893e-13	5.21241e-08
901	RBC	7	ENSMUSG00000006360	Crip1	0.0115152	1.3436	0.492537	0.0233793	0.130069	6.66861e-120	3.19209e-114
902	RBC	7	ENSMUSG00000006574	Slc4a1	0.0256886	0.00523447	0.0268657	0.956186	0.0243783	1.85799e-23	8.89369e-18
903	RBC	7	ENSMUSG00000019505	Ubb	0.0116936	0.674525	0.520896	0.0224491	0.128844	9.15908e-119	4.38422e-113
904	RBC	7	ENSMUSG00000020295	Hbq1a	0.0575847	0.0489839	0.0597015	0.964543	0.0527197	5.14246e-49	2.46156e-43
905	RBC	7	ENSMUSG00000020641	Rsad2	0.00799018	0.0433071	0.0776119	0.10295	0.00223409	0.00256836	1
906	RBC	7	ENSMUSG00000022051	Bnip3l	0.031045	0.240703	0.343284	0.0904355	0.00851791	3.84233e-09	0.00183922
907	RBC	7	ENSMUSG00000023046	Igfbp6	0.0102308	0.614985	0.259701	0.0393943	0.0554046	1.90954e-51	9.14048e-46
908	RBC	7	ENSMUSG00000052305	Hbb-bs	0.767469	362.329	0.974627	0.787449	0.838827	0	0
909	RBC	7	ENSMUSG00000023995	Tspo2	0.0093745	0.00703573	0.019403	0.483148	0.00573069	1.36103e-06	0.651489
910	RBC	7	ENSMUSG00000024588	Fech	0.0379192	0.101812	0.237313	0.159785	0.0321476	1.88613e-30	9.02841e-25
911	RBC	7	ENSMUSG00000024661	Fth1	0.00956977	1.08046	0.555224	0.0172359	0.349295	0	0
912	RBC	7	ENSMUSG00000028906	Epb41	0.00967749	0.0513989	0.119403	0.081049	0.0104797	6.34979e-11	3.03948e-05
913	RBC	7	ENSMUSG00000029922	Mkrn1	0.0555697	0.286763	0.361194	0.15385	0.0694111	3.72586e-64	1.78347e-58
914	RBC	7	ENSMUSG00000031950	Gabarapl2	0.00994654	0.0921489	0.213433	0.0466027	3.71517e-05	0.697466	1
915	RBC	7	ENSMUSG00000032411	Tfdp2	0.00969465	0.0402603	0.0970149	0.0999295	0.0030814	0.000398084	1
916	RBC	7	ENSMUSG00000034248	Slc25a37	0.0537341	0.119111	0.197015	0.272741	0.066212	3.01339e-61	1.44243e-55
917	RBC	7	ENSMUSG00000039236	Isg20	0.061968	0.0856886	0.210448	0.294458	0.0593934	4.64595e-55	2.2239e-49
918	RBC	7	ENSMUSG00000038871	Bpgm	0.151831	0.347416	0.389552	0.389759	0.199345	4.10615e-185	1.96551e-179
919	RBC	7	ENSMUSG00000044792	Isca1	0.0284076	0.0830885	0.207463	0.136929	0.029804	2.42999e-28	1.16317e-22
920	RBC	7	ENSMUSG00000047139	Cd24a	0.0100672	0.113063	0.191045	0.0526953	0.0243014	2.17934e-23	1.0432e-17
921	RBC	7	ENSMUSG00000023572	Ccndbp1	0.0129949	0.063125	0.156716	0.0829197	0.00649121	2.72494e-07	0.130436
922	RBC	7	ENSMUSG00000073400	Trim10	0.0119358	0.00297596	0.0179104	0.666415	0.00932545	7.08324e-10	0.000339056
923	RBC	7	ENSMUSG00000035242	Oaz1	0.00983336	0.252367	0.334328	0.0294123	0.0376526	2.07102e-35	9.91342e-30
924	RBC	7	ENSMUSG00000051839	Gypa	0.0708863	0.0583665	0.0776119	0.913342	0.0656835	9.10223e-61	4.357e-55
925	RBC	7	ENSMUSG00000025270	Alas2	0.453145	0.658557	0.562687	0.805324	0.465471	0	0
926	RBC	7	ENSMUSG00000064337	mt-Rnr1	0.0077813	0.265699	0.216418	0.035955	0.0332356	1.97571e-31	9.4572e-26
927	RBC	7	ENSMUSG00000064339	mt-Rnr2	0.0247805	2.05464	0.734328	0.0337458	0.161068	7.18559e-149	3.43956e-143
928	RBC	7	ENSMUSG00000064341	mt-Nd1	0.0443908	6.74553	0.956716	0.0463991	0.190122	2.47977e-176	1.187e-170
929	RBC	7	ENSMUSG00000064345	mt-Nd2	0.0368473	1.91093	0.701493	0.052527	0.0693778	3.99451e-64	1.91207e-58
930	RBC	7	ENSMUSG00000064351	mt-Co1	0.0157848	0.657565	0.383582	0.0411511	0.036359	3.03371e-34	1.45216e-28
931	RBC	7	ENSMUSG00000064357	mt-Atp6	0.0242421	0.953398	0.540299	0.044868	0.0280318	9.56926e-27	4.58056e-21
932	RBC	7	ENSMUSG00000064358	mt-Co3	0.0275606	1.40135	0.643284	0.0428437	0.0425501	7.93345e-40	3.79754e-34
933	RBC	7	ENSMUSG00000064363	mt-Nd4	0.0477374	4.45548	0.902985	0.0528662	0.0988845	4.29984e-91	2.05822e-85
934	RBC	7	ENSMUSG00000064368	mt-Nd6	0.0126282	0.412054	0.256716	0.0491914	0.0200208	1.55428e-19	7.43992e-14
935	RBC	7	ENSMUSG00000064370	mt-Cytb	0.0471882	8.22651	0.977612	0.0482689	0.154217	1.94003e-142	9.28641e-137
936	RBC	7	ENSMUSG00000069917	Hba-a2	0.766173	190.046	0.961194	0.797106	0.836152	0	0
937	RBC	7	ENSMUSG00000069919	Hba-a1	0.772964	211.291	0.968657	0.797975	0.840871	0	0
938	RBC	7	ENSMUSG00000050708	Ftl1	0.0178483	1.37949	0.740299	0.0241096	0.0993869	1.48572e-91	7.11174e-86
939	RBC	7	ENSMUSG00000073940	Hbb-bt	0.70955	42.3193	0.886567	0.800334	0.710319	0	0
940	RBC	7	ENSMUSG00000074269	Rec114	0.0614819	0.0629393	0.114925	0.534973	0.0548267	6.37048e-51	3.04939e-45
941	RBC	7	ENSMUSG00000029580	Actb	0.0076389	2.08205	0.356716	0.0214145	0.237458	9.67884e-222	4.63301e-216
942	RBC	7	ENSMUSG00000073063	Hbq1b	0.0175009	0.00480835	0.019403	0.901968	0.0161115	5.17102e-16	2.47523e-10
943	RBC	7	ENSMUSG00000017002	Slpi	0.0147136	1.25389	0.465672	0.0315966	0.072646	4.24304e-67	2.03104e-61
944	RBC	7	ENSMUSG00000078974	Sec61g	0.0287288	0.18514	0.3	0.0957627	0.00885072	1.91325e-09	0.000915823
945	RBC	7	ENSMUSG00000056234	Ncoa4	0.00891382	0.0721729	0.161194	0.0552987	0.00241054	0.00173605	1
946	RBC	7	ENSMUSG00000025889	Snca	0.199604	0.286269	0.368657	0.541436	0.250225	3.91763e-234	1.87527e-228
947	RBC	7	ENSMUSG00000091694	Apol11b	0.0261059	0.0149717	0.0402985	0.647813	0.0274034	3.51937e-26	1.68463e-20
948	RBC	7	ENSMUSG00000093674	Rpl41	0.0143756	1.07334	0.598507	0.024019	0.153444	1.02879e-141	4.92456e-136
949	RBC	7	ENSMUSG00000095079	Igha	0.00981544	3.59549	0.0134328	0.730705	0.00636061	3.59023e-07	0.171855
950	RBC	7	ENSMUSG00000101939	Gm28438	0.0165466	0.536521	0.332836	0.0497141	0.0304409	6.49e-29	3.1066e-23
951	Pdgfra+ Fibroblasts	8	ENSMUSG00000029231	Pdgfra	0.421626	1.87433	0.708333	0.595236	0.458967	2.97564e-220	1.42436e-214
952	Pdgfra+ Fibroblasts	8	ENSMUSG00000000794	Kcnn3	0.234522	0.61306	0.391667	0.598779	0.199952	1.12687e-94	5.39405e-89
953	Pdgfra+ Fibroblasts	8	ENSMUSG00000001506	Col1a1	0.157058	1.3213	0.595833	0.263593	0.161592	1.34279e-76	6.42758e-71
954	Pdgfra+ Fibroblasts	8	ENSMUSG00000002847	Pla1a	0.146958	0.330211	0.3125	0.470266	0.185706	6.0152e-88	2.87932e-82
955	Pdgfra+ Fibroblasts	8	ENSMUSG00000002997	Prkar2b	0.157736	0.31559	0.341667	0.461667	0.140382	1.17559e-66	5.62724e-61
956	Pdgfra+ Fibroblasts	8	ENSMUSG00000019966	Kitl	0.1865	0.734427	0.4875	0.382564	0.130502	4.88604e-62	2.33882e-56
957	Pdgfra+ Fibroblasts	8	ENSMUSG00000022860	Chodl	0.303737	0.711188	0.479167	0.633885	0.263475	6.84666e-125	3.27732e-119
958	Pdgfra+ Fibroblasts	8	ENSMUSG00000022890	Atp5j	0.209029	4.56093	0.7625	0.274137	0.200689	5.04995e-95	2.41728e-89
959	Pdgfra+ Fibroblasts	8	ENSMUSG00000023224	Serping1	0.155878	2.18691	0.675	0.230931	0.107998	1.52123e-51	7.28172e-46
960	Pdgfra+ Fibroblasts	8	ENSMUSG00000023886	Smoc2	0.240293	1.33879	0.5875	0.40901	0.201541	1.99605e-95	9.55458e-90
961	Pdgfra+ Fibroblasts	8	ENSMUSG00000023913	Pla2g7	0.154504	0.663019	0.504167	0.306453	0.119631	5.78835e-57	2.77073e-51
962	Pdgfra+ Fibroblasts	8	ENSMUSG00000025488	Cox8b	0.199223	0.429354	0.4	0.498056	0.201955	1.27218e-95	6.08961e-90
963	Pdgfra+ Fibroblasts	8	ENSMUSG00000025491	Ifitm1	0.157008	0.946506	0.516667	0.303887	0.256134	2.21738e-121	1.0614e-115
964	Pdgfra+ Fibroblasts	8	ENSMUSG00000026574	Dpt	0.206103	0.383243	0.391667	0.526222	0.258728	1.27748e-122	6.11495e-117
965	Pdgfra+ Fibroblasts	8	ENSMUSG00000027210	Meis2	0.185966	0.724856	0.495833	0.375058	0.154566	2.66432e-73	1.27534e-67
966	Pdgfra+ Fibroblasts	8	ENSMUSG00000028005	Gucy1b1	0.226268	0.940669	0.579167	0.390679	0.342115	8.25637e-163	3.95211e-157
967	Pdgfra+ Fibroblasts	8	ENSMUSG00000028364	Tnc	0.232239	0.7674	0.475	0.488924	0.188909	1.85493e-89	8.87908e-84
968	Pdgfra+ Fibroblasts	8	ENSMUSG00000029163	Emilin1	0.228114	0.870044	0.570833	0.399615	0.233639	1.18174e-110	5.65668e-105
969	Pdgfra+ Fibroblasts	8	ENSMUSG00000029467	Atp2a2	0.157102	0.559656	0.433333	0.362543	0.133064	3.10527e-63	1.48641e-57
970	Pdgfra+ Fibroblasts	8	ENSMUSG00000029661	Col1a2	0.161635	1.38182	0.658333	0.245521	0.185366	8.7076e-88	4.1681e-82
971	Pdgfra+ Fibroblasts	8	ENSMUSG00000030218	Mgp	0.330196	3.18186	0.766667	0.43069	0.349904	1.34574e-166	6.44171e-161
972	Pdgfra+ Fibroblasts	8	ENSMUSG00000056973	Ces1d	0.335993	1.09751	0.458333	0.733075	0.283301	2.13816e-134	1.02348e-128
973	Pdgfra+ Fibroblasts	8	ENSMUSG00000031740	Mmp2	0.154647	0.385178	0.420833	0.367479	0.145917	3.01233e-69	1.44192e-63
974	Pdgfra+ Fibroblasts	8	ENSMUSG00000032024	Clmp	0.199171	0.526295	0.475	0.419308	0.178908	9.62634e-85	4.60788e-79
975	Pdgfra+ Fibroblasts	8	ENSMUSG00000027859	Ngf	0.153952	0.300216	0.2875	0.535484	0.155346	1.1472e-73	5.49136e-68
976	Pdgfra+ Fibroblasts	8	ENSMUSG00000036446	Lum	0.434627	7.35355	0.775	0.56081	0.470124	8.27217e-226	3.95967e-220
977	Pdgfra+ Fibroblasts	8	ENSMUSG00000039252	Lgi2	0.270556	0.580595	0.441667	0.61258	0.235621	1.34682e-111	6.44689e-106
978	Pdgfra+ Fibroblasts	8	ENSMUSG00000042436	Mfap4	0.367178	1.81002	0.575	0.638571	0.374873	8.87796e-179	4.24965e-173
979	Pdgfra+ Fibroblasts	8	ENSMUSG00000033910	Gucy1a1	0.195126	0.93084	0.5625	0.34689	0.276914	2.49092e-131	1.19234e-125
980	Pdgfra+ Fibroblasts	8	ENSMUSG00000036766	Dner	0.188677	0.404127	0.329167	0.573197	0.178541	1.43412e-84	6.86475e-79
981	Pdgfra+ Fibroblasts	8	ENSMUSG00000006369	Fbln1	0.350533	1.52614	0.654167	0.535847	0.386412	1.98894e-184	9.52052e-179
982	Pdgfra+ Fibroblasts	8	ENSMUSG00000046491	C1qtnf2	0.145172	0.427739	0.408333	0.355524	0.115939	3.04513e-55	1.45762e-49
983	Pdgfra+ Fibroblasts	8	ENSMUSG00000048376	F2r	0.157757	0.538557	0.441667	0.357186	0.192218	5.08686e-91	2.43495e-85
984	Pdgfra+ Fibroblasts	8	ENSMUSG00000041261	Car8	0.156933	0.304957	0.329167	0.476758	0.11412	2.14369e-54	1.02613e-48
985	Pdgfra+ Fibroblasts	8	ENSMUSG00000064179	Tnnt1	0.158295	0.248347	0.241667	0.655012	0.115268	6.25585e-55	2.99451e-49
986	Pdgfra+ Fibroblasts	8	ENSMUSG00000058620	Adra2b	0.183566	0.808627	0.5	0.367132	0.226606	2.61159e-107	1.2501e-101
987	Pdgfra+ Fibroblasts	8	ENSMUSG00000031673	Cdh11	0.168848	0.412851	0.383333	0.440472	0.0943033	3.54652e-45	1.69763e-39
988	Pdgfra+ Fibroblasts	8	ENSMUSG00000057280	Musk	0.278984	0.547231	0.404167	0.690269	0.239124	2.89199e-113	1.38432e-107
989	Pdgfra+ Fibroblasts	8	ENSMUSG00000066705	Fxyd6	0.199669	1.52183	0.65	0.307183	0.262701	1.6068e-124	7.69134e-119
990	Pdgfra+ Fibroblasts	8	ENSMUSG00000070576	Mn1	0.187931	0.612705	0.416667	0.451034	0.124646	2.64989e-59	1.26843e-53
991	Pdgfra+ Fibroblasts	8	ENSMUSG00000053062	Jam2	0.241733	0.759789	0.525	0.460444	0.187562	8.01679e-89	3.83743e-83
992	Pdgfra+ Fibroblasts	8	ENSMUSG00000074971	Fibin	0.462273	2.47829	0.704167	0.656482	0.432901	2.53851e-207	1.21512e-201
993	Pdgfra+ Fibroblasts	8	ENSMUSG00000029838	Ptn	0.299533	3.04318	0.7125	0.420397	0.244519	7.76507e-116	3.71694e-110
994	Pdgfra+ Fibroblasts	8	ENSMUSG00000019929	Dcn	0.181427	9.59276	0.816667	0.222156	0.112725	9.57736e-54	4.58443e-48
995	Pdgfra+ Fibroblasts	8	ENSMUSG00000055632	Hmcn2	0.182716	1.22415	0.570833	0.320087	0.155948	5.98243e-74	2.86363e-68
996	Pdgfra+ Fibroblasts	8	ENSMUSG00000052516	Robo2	0.147012	0.12802	0.2125	0.691819	0.135513	2.22513e-64	1.06511e-58
997	Pdgfra+ Fibroblasts	8	ENSMUSG00000048022	Tmem229a	0.151045	0.184323	0.2	0.755227	0.116308	2.04974e-55	9.81158e-50
998	Pdgfra+ Fibroblasts	8	ENSMUSG00000045658	Pid1	0.161483	0.628319	0.5	0.322965	0.138881	5.91712e-66	2.83237e-60
999	Pdgfra+ Fibroblasts	8	ENSMUSG00000021943	Gdf10	0.214853	0.987419	0.5125	0.419225	0.29273	6.26443e-139	2.99862e-133
1000	Pdgfra+ Fibroblasts	8	ENSMUSG00000023885	Thbs2	0.449965	1.58918	0.675	0.666615	0.415019	1.72109e-198	8.23841e-193
1001	B Lymphocytes	9	ENSMUSG00000000903	Vpreb3	0.218783	0.40862	0.319018	0.6858	0.245891	8.16905e-88	3.91031e-82
1002	B Lymphocytes	9	ENSMUSG00000003379	Cd79a	0.673139	2.55271	0.865031	0.778167	0.771379	4.51446e-282	2.16096e-276
1003	B Lymphocytes	9	ENSMUSG00000003970	Rpl8	0.12934	4.11034	0.93865	0.137794	0.162996	1.70312e-58	8.15241e-53
1004	B Lymphocytes	9	ENSMUSG00000012848	Rps5	0.133625	5.75834	0.969325	0.137853	0.203792	6.94415e-73	3.32398e-67
1005	B Lymphocytes	9	ENSMUSG00000005540	Fcer2a	0.135135	0.159589	0.165644	0.815814	0.138513	6.79795e-50	3.254e-44
1006	B Lymphocytes	9	ENSMUSG00000005583	Mef2c	0.137426	0.726855	0.570552	0.240865	0.0920957	1.19433e-33	5.71694e-28
1007	B Lymphocytes	9	ENSMUSG00000008668	Rps18	0.14803	7.07676	0.969325	0.152715	0.253562	1.52224e-90	7.28658e-85
1008	B Lymphocytes	9	ENSMUSG00000017404	Rpl19	0.130265	3.46176	0.944785	0.137878	0.165702	1.90079e-59	9.09857e-54
1009	B Lymphocytes	9	ENSMUSG00000024334	H2-Oa	0.128764	0.287352	0.294479	0.437261	0.156887	2.39702e-56	1.14739e-50
1010	B Lymphocytes	9	ENSMUSG00000025362	Rps26	0.127154	2.70434	0.883436	0.143932	0.112939	6.18424e-41	2.96024e-35
1011	B Lymphocytes	9	ENSMUSG00000027368	Dusp2	0.33904	1.4894	0.680982	0.49787	0.428853	9.90583e-154	4.74166e-148
1012	B Lymphocytes	9	ENSMUSG00000028081	Rps3a1	0.137309	4.26752	0.93865	0.146283	0.162191	3.26957e-58	1.56506e-52
1013	B Lymphocytes	9	ENSMUSG00000030707	Coro1a	0.151829	1.6088	0.766871	0.197984	0.244422	2.72019e-87	1.30208e-81
1014	B Lymphocytes	9	ENSMUSG00000030724	Cd19	0.186531	0.256854	0.245399	0.760116	0.200703	8.59053e-72	4.11206e-66
1015	B Lymphocytes	9	ENSMUSG00000030744	Rps3	0.134128	4.0382	0.95092	0.14105	0.163974	7.71099e-59	3.69105e-53
1016	B Lymphocytes	9	ENSMUSG00000030798	Cd37	0.227399	0.912273	0.656442	0.346411	0.340789	8.68251e-122	4.15609e-116
1017	B Lymphocytes	9	ENSMUSG00000032399	Rpl4	0.134863	3.2596	0.932515	0.144623	0.178386	6.48253e-64	3.10302e-58
1018	B Lymphocytes	9	ENSMUSG00000032518	Rpsa	0.126736	2.7968	0.877301	0.144461	0.162758	2.06522e-58	9.88567e-53
1019	B Lymphocytes	9	ENSMUSG00000008193	Spib	0.158789	0.236809	0.239264	0.663659	0.190747	2.82459e-68	1.35206e-62
1020	B Lymphocytes	9	ENSMUSG00000034892	Rps29	0.132151	8.33989	0.981595	0.134629	0.148679	1.83518e-53	8.78453e-48
1021	B Lymphocytes	9	ENSMUSG00000036478	Btg1	0.159004	3.01241	0.877301	0.181243	0.283444	3.3284e-101	1.59322e-95
1022	B Lymphocytes	9	ENSMUSG00000042474	Fcmr	0.402391	0.780251	0.484663	0.830249	0.392589	1.58242e-140	7.57465e-135
1023	B Lymphocytes	9	ENSMUSG00000034634	Ly6d	0.631437	2.156	0.723926	0.872239	0.6163	3.95191e-223	1.89168e-217
1024	B Lymphocytes	9	ENSMUSG00000037548	H2-DMb2	0.358235	1.0996	0.638037	0.561464	0.442446	1.06795e-158	5.112e-153
1025	B Lymphocytes	9	ENSMUSG00000038274	Fau	0.152528	4.73597	0.969325	0.157355	0.190076	4.87625e-68	2.33414e-62
1026	B Lymphocytes	9	ENSMUSG00000040592	Cd79b	0.480995	1.55522	0.791411	0.607769	0.491429	1.10954e-176	5.31109e-171
1027	B Lymphocytes	9	ENSMUSG00000038421	Fcrla	0.193556	0.321136	0.282209	0.68586	0.223911	5.21663e-80	2.49707e-74
1028	B Lymphocytes	9	ENSMUSG00000024610	Cd74	0.14819	31.9164	1	0.14819	0.113292	4.6567e-41	2.22904e-35
1029	B Lymphocytes	9	ENSMUSG00000045128	Rpl18a	0.156315	8.31213	0.969325	0.161262	0.261679	1.95543e-93	9.36016e-88
1030	B Lymphocytes	9	ENSMUSG00000062006	Rpl34	0.136867	4.15696	0.969325	0.141198	0.15113	2.52797e-54	1.21007e-48
1031	B Lymphocytes	9	ENSMUSG00000063457	Rps15	0.126298	4.0443	0.93865	0.134553	0.125124	3.35461e-45	1.60577e-39
1032	B Lymphocytes	9	ENSMUSG00000052837	Junb	0.159732	5.91201	0.865031	0.184654	0.292738	1.57532e-104	7.54063e-99
1033	B Lymphocytes	9	ENSMUSG00000057098	Ebf1	0.212684	2.05266	0.797546	0.266673	0.399774	3.879e-143	1.85677e-137
1034	B Lymphocytes	9	ENSMUSG00000060036	Rpl3	0.130752	2.92611	0.883436	0.148004	0.160339	1.46545e-57	7.01473e-52
1035	B Lymphocytes	9	ENSMUSG00000057841	Rpl32	0.140724	6.86969	0.98773	0.142472	0.206178	9.94708e-74	4.76141e-68
1036	B Lymphocytes	9	ENSMUSG00000067274	Rplp0	0.132988	5.00377	0.97546	0.136334	0.17885	4.44829e-64	2.12928e-58
1037	B Lymphocytes	9	ENSMUSG00000067288	Rps28	0.148468	5.61753	0.957055	0.15513	0.22209	2.30732e-79	1.10445e-73
1038	B Lymphocytes	9	ENSMUSG00000068105	Tnfrsf13c	0.269366	0.469433	0.411043	0.655324	0.309626	1.3969e-110	6.68659e-105
1039	B Lymphocytes	9	ENSMUSG00000028234	Rps20	0.135725	2.82231	0.889571	0.152573	0.137019	2.27093e-49	1.08704e-43
1040	B Lymphocytes	9	ENSMUSG00000037944	Ccr7	0.173606	0.362795	0.276074	0.628839	0.220296	9.97703e-79	4.77575e-73
1041	B Lymphocytes	9	ENSMUSG00000076617	Ighm	0.356514	2.54567	0.766871	0.464894	0.34449	4.02084e-123	1.92467e-117
1042	B Lymphocytes	9	ENSMUSG00000076937	Iglc2	0.460853	1.51945	0.582822	0.790726	0.450168	1.59227e-161	7.6218e-156
1043	B Lymphocytes	9	ENSMUSG00000008683	Rps15a	0.136785	4.2448	0.932515	0.146684	0.172935	5.4015e-62	2.58556e-56
1044	B Lymphocytes	9	ENSMUSG00000040952	Rps19	0.160995	10.5128	0.981595	0.164014	0.322017	4.95542e-115	2.37203e-109
1045	B Lymphocytes	9	ENSMUSG00000021754	Map3k1	0.129248	1.39026	0.705521	0.183195	0.136324	3.98255e-49	1.90634e-43
1046	B Lymphocytes	9	ENSMUSG00000025290	Rps24	0.143073	5.53645	0.96319	0.148541	0.181756	4.20198e-65	2.01138e-59
1047	B Lymphocytes	9	ENSMUSG00000079641	Rpl39	0.131733	5.58678	0.96319	0.136767	0.148639	1.8962e-53	9.07664e-48
1048	B Lymphocytes	9	ENSMUSG00000024673	Ms4a1	0.127639	0.168044	0.177914	0.717417	0.148278	2.53851e-53	1.21512e-47
1049	B Lymphocytes	9	ENSMUSG00000090862	Rps13	0.145914	2.04773	0.877301	0.166321	0.167663	3.88147e-60	1.85796e-54
1050	B Lymphocytes	9	ENSMUSG00000104213	Ighd	0.263925	0.441207	0.306748	0.860396	0.232019	6.93439e-83	3.31931e-77

## Sheet: P21 data
	cell_type	cell_group	gene_id	gene_short_name	marker_score	mean_expression	fraction_expressing	specificity	pseudo_R2	marker_test_p_value	marker_test_q_value
1	SMC	1	ENSMUSG00000001270	Ckb	0.146062	5.49908	0.924185	0.158044	0.185072	0	0
2	SMC	1	ENSMUSG00000001349	Cnn1	0.153537	6.08181	0.941899	0.163008	0.237993	0	0
3	SMC	1	ENSMUSG00000004951	Hspb1	0.0839363	1.81216	0.583137	0.143939	0.0405981	4.42528e-76	4.1666e-70
4	SMC	1	ENSMUSG00000007892	Rplp1	0.114573	5.33365	0.908833	0.126066	0.0728506	1.25775e-136	1.18423e-130
5	SMC	1	ENSMUSG00000020439	Smtn	0.108457	2.5363	0.707369	0.153325	0.0636424	3.40266e-119	3.20375e-113
6	SMC	1	ENSMUSG00000015143	Actn1	0.079809	1.73212	0.565659	0.14109	0.0208313	1.24466e-39	1.17191e-33
7	SMC	1	ENSMUSG00000000555	Itga5	0.0804077	1.63151	0.537789	0.149515	0.01968	1.60484e-37	1.51103e-31
8	SMC	1	ENSMUSG00000022836	Mylk	0.103104	2.34799	0.661549	0.155853	0.0541246	2.66359e-101	2.50789e-95
9	SMC	1	ENSMUSG00000024661	Fth1	0.0852965	4.50998	0.866084	0.0984852	0.01043	1.3573e-20	1.27796e-14
10	SMC	1	ENSMUSG00000025393	Atp5b	0.0778966	2.17388	0.643127	0.121122	0.0173169	3.41633e-33	3.21663e-27
11	SMC	1	ENSMUSG00000026208	Des	0.178258	18.9067	0.998111	0.178595	0.493465	0	0
12	SMC	1	ENSMUSG00000026414	Tnnt2	0.0773752	1.41237	0.485357	0.159419	0.0554096	1.03974e-103	9.78958e-98
13	SMC	1	ENSMUSG00000026421	Csrp1	0.145728	6.48884	0.951346	0.15318	0.177887	0	0
14	SMC	1	ENSMUSG00000028464	Tpm2	0.160938	25.6445	0.999528	0.161014	0.457145	0	0
15	SMC	1	ENSMUSG00000032366	Tpm1	0.147917	16.897	0.998347	0.148162	0.348481	0	0
16	SMC	1	ENSMUSG00000029761	Cald1	0.115109	4.1511	0.84034	0.136979	0.0755103	1.10183e-141	1.03742e-135
17	SMC	1	ENSMUSG00000030409	Dmpk	0.129999	2.63967	0.723193	0.179757	0.119304	1.81786e-226	1.7116e-220
18	SMC	1	ENSMUSG00000030695	Aldoa	0.0849218	1.92634	0.623051	0.1363	0.0346779	4.07408e-65	3.83593e-59
19	SMC	1	ENSMUSG00000031328	Flna	0.141816	7.06862	0.962919	0.147277	0.190521	0	0
20	SMC	1	ENSMUSG00000031633	Slc25a4	0.0774781	2.20256	0.650449	0.119115	0.0115862	1.04163e-22	9.80742e-17
21	SMC	1	ENSMUSG00000031636	Pdlim3	0.0879628	1.56309	0.543694	0.161787	0.0522888	7.28936e-98	6.86326e-92
22	SMC	1	ENSMUSG00000032085	Tagln	0.154285	6.22962	0.932688	0.16542	0.181437	0	0
23	SMC	1	ENSMUSG00000035202	Lars2	0.099915	2.41384	0.5718	0.174738	0.0611022	2.08751e-114	1.96549e-108
24	SMC	1	ENSMUSG00000035783	Acta2	0.146895	27.2318	0.999764	0.146929	0.333231	0	0
25	SMC	1	ENSMUSG00000037742	Eef1a1	0.0864577	3.61598	0.820265	0.105402	0.0166718	5.18227e-32	4.87934e-26
26	SMC	1	ENSMUSG00000021493	Pdlim7	0.0988173	1.93576	0.600142	0.164657	0.0509144	2.70976e-95	2.55136e-89
27	SMC	1	ENSMUSG00000050856	Atp5k	0.0840407	2.04478	0.619036	0.13576	0.0304909	2.18175e-57	2.05422e-51
28	SMC	1	ENSMUSG00000046330	Rpl37a	0.0975869	3.7892	0.831601	0.117348	0.0348676	1.8176e-65	1.71135e-59
29	SMC	1	ENSMUSG00000059430	Actg2	0.153226	29.6581	0.999764	0.153262	0.345483	0	0
30	SMC	1	ENSMUSG00000057322	Rpl38	0.0880402	2.84499	0.741143	0.11879	0.0238527	3.55911e-45	3.35106e-39
31	SMC	1	ENSMUSG00000064337	mt-Rnr1	0.114794	13.7147	0.967171	0.11869	0.0585594	1.26875e-109	1.19459e-103
32	SMC	1	ENSMUSG00000064339	mt-Rnr2	0.107467	50.8739	1	0.107467	0.0820283	4.02422e-154	3.78898e-148
33	SMC	1	ENSMUSG00000064341	mt-Nd1	0.11768	14.385	0.985357	0.119429	0.06834	4.50537e-128	4.24201e-122
34	SMC	1	ENSMUSG00000064345	mt-Nd2	0.124899	17.4123	0.995513	0.125462	0.13252	1.24852e-252	1.17554e-246
35	SMC	1	ENSMUSG00000064356	mt-Atp8	0.0914884	3.41332	0.754369	0.121278	0.0129517	3.31429e-25	3.12056e-19
36	SMC	1	ENSMUSG00000064363	mt-Nd4	0.112435	13.5536	0.985829	0.114052	0.0620364	3.62978e-116	3.4176e-110
37	SMC	1	ENSMUSG00000064370	mt-Cytb	0.115641	28.4217	0.999291	0.115723	0.0906425	1.18063e-170	1.11161e-164
38	SMC	1	ENSMUSG00000067818	Myl9	0.152993	14.0429	0.998111	0.153283	0.376011	0	0
39	SMC	1	ENSMUSG00000068220	Lgals1	0.0791753	3.1252	0.769485	0.102894	0.0395611	3.7112e-74	3.49426e-68
40	SMC	1	ENSMUSG00000018830	Myh11	0.156709	16.2807	0.998111	0.157005	0.361955	0	0
41	SMC	1	ENSMUSG00000071356	Reg3b	0.0851341	4.25992	0.85026	0.100127	0.23686	0	0
42	SMC	1	ENSMUSG00000029580	Actb	0.11333	12.8923	0.995985	0.113787	0.171254	0	0
43	SMC	1	ENSMUSG00000015932	Dstn	0.0836322	1.86492	0.588333	0.142151	0.0310222	2.28689e-58	2.15321e-52
44	SMC	1	ENSMUSG00000060126	Tpt1	0.089302	4.35806	0.860888	0.103732	0.0154316	9.63666e-30	9.07335e-24
45	SMC	1	ENSMUSG00000025290	Rps24	0.0788847	3.02288	0.754842	0.104505	0.0101319	4.76607e-20	4.48747e-14
46	SMC	1	ENSMUSG00000090841	Myl6	0.142986	10.7998	0.993387	0.143938	0.287917	0	0
47	SMC	1	ENSMUSG00000093674	Rpl41	0.0898899	3.9263	0.842702	0.106669	0.0133869	5.30097e-26	4.9911e-20
48	SMC	1	ENSMUSG00000098973	Mir6236	0.115644	3.9916	0.718233	0.161012	0.0555729	5.13769e-104	4.83737e-98
49	SMC	1	ENSMUSG00000101939	Gm28438	0.0854497	4.64501	0.757204	0.112849	0.000641165	0.0213032	1
50	SMC	1	ENSMUSG00000106106	CT010467.1	0.154645	33.8243	0.999528	0.154718	0.369455	0	0
51	Fibroblasts	10	ENSMUSG00000000359	Rem1	0.138548	0.299735	0.383333	0.361429	0.123162	1.09499e-85	1.03098e-79
52	Fibroblasts	10	ENSMUSG00000029231	Pdgfra	0.403484	5.57447	0.95	0.42472	0.440896	9.42687454720685e-316	8.87582659554987e-310
53	Fibroblasts	10	ENSMUSG00000000794	Kcnn3	0.295394	1.42124	0.742857	0.397645	0.277486	8.85845e-195	8.34063e-189
54	Fibroblasts	10	ENSMUSG00000002900	Lamb1	0.131497	1.14844	0.683333	0.192435	0.105119	3.13931e-73	2.9558e-67
55	Fibroblasts	10	ENSMUSG00000002997	Prkar2b	0.147659	0.397155	0.438095	0.337047	0.140237	1.57093e-97	1.4791e-91
56	Fibroblasts	10	ENSMUSG00000015134	Aldh1a3	0.142795	0.428753	0.42381	0.336932	0.117533	8.54688e-82	8.04727e-76
57	Fibroblasts	10	ENSMUSG00000019966	Kitl	0.133448	1.03085	0.621429	0.214744	0.0983942	1.33438e-68	1.25638e-62
58	Fibroblasts	10	ENSMUSG00000020719	Ddx5	0.151554	2.74471	0.92619	0.163631	0.13266	2.87207e-92	2.70418e-86
59	Fibroblasts	10	ENSMUSG00000020866	Cacna1g	0.135743	0.321616	0.383333	0.354113	0.10382	2.46285e-72	2.31888e-66
60	Fibroblasts	10	ENSMUSG00000022114	Spry2	0.185898	0.659821	0.557143	0.333663	0.174723	1.29076e-121	1.21531e-115
61	Fibroblasts	10	ENSMUSG00000022860	Chodl	0.207719	0.828105	0.542857	0.38264	0.164993	8.49636e-115	7.99971e-109
62	Fibroblasts	10	ENSMUSG00000025969	Nrp2	0.127075	1.59061	0.730952	0.173849	0.106023	7.48721e-74	7.04954e-68
63	Fibroblasts	10	ENSMUSG00000027210	Meis2	0.245261	2.43168	0.852381	0.287736	0.321939	4.17512e-227	3.93106e-221
64	Fibroblasts	10	ENSMUSG00000028005	Gucy1b1	0.254291	1.10235	0.635714	0.400008	0.236726	1.67381e-165	1.57596e-159
65	Fibroblasts	10	ENSMUSG00000028364	Tnc	0.148767	2.26975	0.75	0.198356	0.115718	1.53513e-80	1.4454e-74
66	Fibroblasts	10	ENSMUSG00000029465	Arpc3	0.175629	1.58158	0.683333	0.257018	0.175793	2.29159e-122	2.15764e-116
67	Fibroblasts	10	ENSMUSG00000029467	Atp2a2	0.137756	2.39694	0.835714	0.164836	0.0833911	2.65386e-58	2.49873e-52
68	Fibroblasts	10	ENSMUSG00000030218	Mgp	0.203211	7.22054	0.907143	0.224012	0.185036	7.30374e-129	6.8768e-123
69	Fibroblasts	10	ENSMUSG00000032035	Ets1	0.135502	0.495379	0.480952	0.281738	0.142804	2.57699e-99	2.42635e-93
70	Fibroblasts	10	ENSMUSG00000035356	Nfkbiz	0.243664	0.833323	0.583333	0.417709	0.22795	3.03442e-159	2.85704e-153
71	Fibroblasts	10	ENSMUSG00000036446	Lum	0.204137	3.9616	0.854762	0.238823	0.182981	2.03941e-127	1.9202e-121
72	Fibroblasts	10	ENSMUSG00000041757	Plekha6	0.197021	0.539994	0.507143	0.388492	0.158027	6.30928e-110	5.94047e-104
73	Fibroblasts	10	ENSMUSG00000039252	Lgi2	0.165418	1.13111	0.664286	0.249017	0.146086	1.34132e-101	1.26291e-95
74	Fibroblasts	10	ENSMUSG00000042436	Mfap4	0.14114	1.19473	0.628571	0.224541	0.102769	1.30377e-71	1.22755e-65
75	Fibroblasts	10	ENSMUSG00000028369	Svep1	0.207497	1.00139	0.633333	0.327626	0.195348	3.95262e-136	3.72157e-130
76	Fibroblasts	10	ENSMUSG00000037379	Spon2	0.125493	1.1407	0.592857	0.211674	0.0938364	1.81063e-65	1.70479e-59
77	Fibroblasts	10	ENSMUSG00000041482	Piezo2	0.141599	0.561041	0.488095	0.290105	0.10948	3.09986e-76	2.91866e-70
78	Fibroblasts	10	ENSMUSG00000033910	Gucy1a1	0.300764	1.61865	0.719048	0.418281	0.29754	2.60888e-209	2.45638e-203
79	Fibroblasts	10	ENSMUSG00000050212	Eva1b	0.138324	0.870134	0.611905	0.226055	0.111603	1.06339e-77	1.00123e-71
80	Fibroblasts	10	ENSMUSG00000045875	Adra1a	0.137515	0.16284	0.240476	0.571844	0.0968431	1.5551e-67	1.46419e-61
81	Fibroblasts	10	ENSMUSG00000048126	Col6a3	0.171831	4.0819	0.919048	0.186967	0.15111	4.2374e-105	3.9897e-99
82	Fibroblasts	10	ENSMUSG00000041261	Car8	0.205658	0.520855	0.452381	0.454612	0.18743	1.50772e-130	1.41958e-124
83	Fibroblasts	10	ENSMUSG00000038855	Itpkb	0.147658	0.738723	0.602381	0.245125	0.116225	6.85751e-81	6.45665e-75
84	Fibroblasts	10	ENSMUSG00000029673	Auts2	0.129897	0.635883	0.530952	0.244649	0.135226	4.76317e-94	4.48474e-88
85	Fibroblasts	10	ENSMUSG00000025936	Gm4956	0.211007	0.312478	0.371429	0.568096	0.168765	1.94311e-117	1.82953e-111
86	Fibroblasts	10	ENSMUSG00000070576	Mn1	0.130404	0.360492	0.383333	0.340185	0.112189	4.19069e-78	3.94572e-72
87	Fibroblasts	10	ENSMUSG00000021134	Srsf5	0.127659	1.05103	0.716667	0.178129	0.100413	5.45347e-70	5.13469e-64
88	Fibroblasts	10	ENSMUSG00000038886	Man2a2	0.141332	0.366496	0.388095	0.364169	0.121733	1.06796e-84	1.00553e-78
89	Fibroblasts	10	ENSMUSG00000053062	Jam2	0.177941	0.926081	0.611905	0.290799	0.173109	1.75134e-120	1.64896e-114
90	Fibroblasts	10	ENSMUSG00000074971	Fibin	0.217204	1.67717	0.702381	0.309239	0.198241	3.58448e-138	3.37495e-132
91	Fibroblasts	10	ENSMUSG00000019929	Dcn	0.125925	6.14507	0.916667	0.137373	0.0910974	1.37623e-63	1.29578e-57
92	Fibroblasts	10	ENSMUSG00000047907	Tshz2	0.27108	2.84215	0.907143	0.298829	0.325265	1.53276e-229	1.44316e-223
93	Fibroblasts	10	ENSMUSG00000055632	Hmcn2	0.221179	2.70133	0.892857	0.247721	0.220563	5.4751e-154	5.15506e-148
94	Fibroblasts	10	ENSMUSG00000022961	Son	0.181193	2.88325	0.930952	0.194631	0.205491	2.67772e-143	2.52119e-137
95	Fibroblasts	10	ENSMUSG00000052516	Robo2	0.254135	0.936478	0.635714	0.399764	0.235764	8.12792e-165	7.65281e-159
96	Fibroblasts	10	ENSMUSG00000045658	Pid1	0.422136	2.87486	0.852381	0.495244	0.486582	0	0
97	Fibroblasts	10	ENSMUSG00000023885	Thbs2	0.189712	1.50093	0.697619	0.271943	0.176414	8.39662e-123	7.90579e-117
98	Fibroblasts	10	ENSMUSG00000092341	Malat1	0.162224	69.0674	0.997619	0.162611	0.302443	7.08262e-213	6.6686e-207
99	Fibroblasts	10	ENSMUSG00000097324	Carmn	0.126668	1.13806	0.67619	0.187326	0.093693	2.27154e-65	2.13875e-59
100	Fibroblasts	10	ENSMUSG00000097971	Gm26917	0.192157	16.665	0.935714	0.205359	0.141467	2.19376e-98	2.06552e-92
101	SMC	11	ENSMUSG00000001270	Ckb	0.199825	7.78181	0.971429	0.205702	0.140435	1.14493e-97	1.078e-91
102	SMC	11	ENSMUSG00000001349	Cnn1	0.224307	9.69245	0.966667	0.232042	0.159077	1.16528e-110	1.09716e-104
103	SMC	11	ENSMUSG00000002379	Ndufa11	0.135175	1.90139	0.628571	0.215051	0.0849412	2.2989e-59	2.16452e-53
104	SMC	11	ENSMUSG00000004951	Hspb1	0.150987	3.11398	0.695238	0.217173	0.047361	1.04106e-33	9.80203e-28
105	SMC	11	ENSMUSG00000009013	Dynll1	0.143269	3.18427	0.802381	0.178555	0.068742	2.78521e-48	2.6224e-42
106	SMC	11	ENSMUSG00000016252	Atp5e	0.132231	2.58858	0.771429	0.171411	0.0602612	1.70578e-42	1.60607e-36
107	SMC	11	ENSMUSG00000020163	Uqcr11	0.134513	2.41479	0.72381	0.18584	0.0689234	2.09394e-48	1.97153e-42
108	SMC	11	ENSMUSG00000020439	Smtn	0.132979	2.88749	0.785714	0.169246	0.0318047	3.92041e-23	3.69124e-17
109	SMC	11	ENSMUSG00000022354	Ndufb9	0.122614	1.74557	0.614286	0.199604	0.0655946	3.92358e-46	3.69423e-40
110	SMC	11	ENSMUSG00000022836	Mylk	0.131554	2.71967	0.754762	0.174298	0.0307609	2.00797e-22	1.8906e-16
111	SMC	11	ENSMUSG00000024608	Rps14	0.126785	3.22362	0.819048	0.154795	0.0607778	7.5805e-43	7.13738e-37
112	SMC	11	ENSMUSG00000024661	Fth1	0.132363	7.13843	0.942857	0.140385	0.0621288	9.08626e-44	8.55513e-38
113	SMC	11	ENSMUSG00000025393	Atp5b	0.12839	3.03169	0.821429	0.156301	0.0530543	1.38816e-37	1.30702e-31
114	SMC	11	ENSMUSG00000026208	Des	0.177688	19.2007	0.983333	0.180699	0.0611477	4.24106e-43	3.99315e-37
115	SMC	11	ENSMUSG00000026414	Tnnt2	0.178294	2.80998	0.664286	0.2684	0.0808504	1.45961e-56	1.37429e-50
116	SMC	11	ENSMUSG00000026421	Csrp1	0.187417	8.76135	0.97381	0.192458	0.109002	6.62111e-76	6.23407e-70
117	SMC	11	ENSMUSG00000026678	Rgs5	0.166383	2.56067	0.67619	0.246059	0.0876431	3.22768e-61	3.03901e-55
118	SMC	11	ENSMUSG00000028464	Tpm2	0.248809	45.554	1	0.248809	0.424078	5.03782e-303	4.74334e-297
119	SMC	11	ENSMUSG00000032366	Tpm1	0.23899	31.7351	1	0.23899	0.372653	1.6514e-264	1.55487e-258
120	SMC	11	ENSMUSG00000029632	Ndufa4	0.126656	2.68958	0.766667	0.165204	0.0589605	1.31432e-41	1.23749e-35
121	SMC	11	ENSMUSG00000029761	Cald1	0.223141	8.19655	0.971429	0.229704	0.220598	5.17001e-154	4.8678e-148
122	SMC	11	ENSMUSG00000031328	Flna	0.197557	10.5002	0.992857	0.198979	0.176053	1.50557e-122	1.41756e-116
123	SMC	11	ENSMUSG00000031633	Slc25a4	0.145594	3.63352	0.833333	0.174713	0.0685418	3.81594e-48	3.59287e-42
124	SMC	11	ENSMUSG00000058056	Palld	0.156172	1.88141	0.611905	0.255223	0.0897178	1.21779e-62	1.1466e-56
125	SMC	11	ENSMUSG00000032330	Cox7a2	0.131848	2.48223	0.742857	0.177488	0.0730181	3.33449e-51	3.13957e-45
126	SMC	11	ENSMUSG00000038690	Atp5j2	0.120537	2.14417	0.695238	0.173375	0.0591914	9.14647e-42	8.61181e-36
127	SMC	11	ENSMUSG00000033306	Lpp	0.133134	2.35506	0.709524	0.187639	0.0455278	1.83876e-32	1.73127e-26
128	SMC	11	ENSMUSG00000035783	Acta2	0.231643	49.6135	1	0.231643	0.436603	1.69784655712915e-312	1.5986e-306
129	SMC	11	ENSMUSG00000035885	Cox8a	0.180291	5.0505	0.92381	0.19516	0.169608	4.98171e-118	4.6905e-112
130	SMC	11	ENSMUSG00000036438	Calm2	0.132778	2.47233	0.769048	0.172653	0.055372	3.66398e-39	3.44981e-33
131	SMC	11	ENSMUSG00000038387	Rras	0.123098	1.42216	0.545238	0.225768	0.0641866	3.58558e-45	3.37598e-39
132	SMC	11	ENSMUSG00000037166	Ppp1r14a	0.209391	2.64767	0.690476	0.303256	0.151566	2.0367e-105	1.91765e-99
133	SMC	11	ENSMUSG00000040666	Sh3bgr	0.159743	1.47463	0.540476	0.295561	0.087959	1.95989e-61	1.84533e-55
134	SMC	11	ENSMUSG00000050856	Atp5k	0.153219	3.10202	0.821429	0.186528	0.0729374	3.78636e-51	3.56503e-45
135	SMC	11	ENSMUSG00000063882	Uqcrh	0.130497	2.32828	0.711905	0.183307	0.0628645	2.86112e-44	2.69387e-38
136	SMC	11	ENSMUSG00000050503	Fbxl22	0.125878	1.4157	0.528571	0.238148	0.0581045	5.03658e-41	4.74217e-35
137	SMC	11	ENSMUSG00000059534	Uqcr10	0.116274	1.92194	0.647619	0.17954	0.0607082	8.45665e-43	7.96232e-37
138	SMC	11	ENSMUSG00000049422	Chchd10	0.117593	1.65551	0.590476	0.199149	0.0994227	2.61763e-69	2.46462e-63
139	SMC	11	ENSMUSG00000039001	Rps21	0.1197	3.72432	0.869048	0.137738	0.048097	3.28654e-34	3.09443e-28
140	SMC	11	ENSMUSG00000048096	Lmod1	0.172883	1.4908	0.566667	0.305087	0.110525	5.8942e-77	5.54965e-71
141	SMC	11	ENSMUSG00000090223	Pcp4	0.160612	2.35159	0.657143	0.244409	0.0729064	3.97575e-51	3.74334e-45
142	SMC	11	ENSMUSG00000019907	Ppp1r12a	0.168883	2.76946	0.728571	0.2318	0.0941244	1.14815e-65	1.08104e-59
143	SMC	11	ENSMUSG00000059430	Actg2	0.19814	41.5843	1	0.19814	0.119664	2.87899e-83	2.7107e-77
144	SMC	11	ENSMUSG00000067818	Myl9	0.247457	26.5003	0.997619	0.248048	0.441688	2.36480015503223e-316	2.22656576196982e-310
145	SMC	11	ENSMUSG00000018830	Myh11	0.232075	27.2607	1	0.232075	0.32014	8.65429e-226	8.1484e-220
146	SMC	11	ENSMUSG00000075702	Selenom	0.143171	2.53148	0.719048	0.199112	0.0859349	4.78993e-60	4.50993e-54
147	SMC	11	ENSMUSG00000029580	Actb	0.159336	19.9931	1	0.159336	0.235628	1.01791e-164	9.58406e-159
148	SMC	11	ENSMUSG00000015932	Dstn	0.145731	2.7093	0.771429	0.18891	0.058076	5.26657e-41	4.95871e-35
149	SMC	11	ENSMUSG00000090841	Myl6	0.191652	15.7816	0.997619	0.19211	0.243676	1.80129e-170	1.69599e-164
150	SMC	11	ENSMUSG00000097324	Carmn	0.131499	1.60812	0.540476	0.243303	0.103906	2.14907e-72	2.02344e-66
151	RBC	12	ENSMUSG00000022283	Pabpc1	0.0618819	0.754821	0.487578	0.126917	0.0110281	9.68174e-08	0.0911579
152	RBC	12	ENSMUSG00000005161	Prdx2	0.0452179	0.477503	0.425466	0.106279	0.0118121	3.40674e-08	0.032076
153	RBC	12	ENSMUSG00000006574	Slc4a1	0.114497	0.103545	0.152174	0.75241	0.10706	1.15417e-62	1.08671e-56
154	RBC	12	ENSMUSG00000007659	Bcl2l1	0.0570096	0.323218	0.332298	0.171562	0.0374325	7.61269e-23	7.16769e-17
155	RBC	12	ENSMUSG00000018677	Slc25a39	0.0683145	0.333272	0.450311	0.151705	0.0429096	5.76755e-26	5.4304e-20
156	RBC	12	ENSMUSG00000019505	Ubb	0.0533259	1.10896	0.627329	0.0850046	0.003703	0.00201001	1
157	RBC	12	ENSMUSG00000020641	Rsad2	0.080883	0.177919	0.217391	0.372062	0.0782033	4.14327e-46	3.90107e-40
158	RBC	12	ENSMUSG00000021792	Prxl2a	0.0560614	0.248186	0.304348	0.184202	0.0317361	1.34175e-19	1.26331e-13
159	RBC	12	ENSMUSG00000022051	Bnip3l	0.204192	0.837895	0.586957	0.347883	0.210507	7.61901e-123	7.17364e-117
160	RBC	12	ENSMUSG00000052305	Hbb-bs	0.674475	599.034	1	0.674475	0.928432	0	0
161	RBC	12	ENSMUSG00000024158	Hagh	0.0616212	0.202809	0.295031	0.208863	0.0468957	3.08819e-28	2.90767e-22
162	RBC	12	ENSMUSG00000024588	Fech	0.243922	0.939365	0.599379	0.406959	0.209897	1.74103e-122	1.63926e-116
163	RBC	12	ENSMUSG00000026208	Des	0.0515954	4.046	0.959627	0.0537661	0.0742135	7.93293e-44	7.46921e-38
164	RBC	12	ENSMUSG00000028436	Dcaf12	0.043434	0.143535	0.229814	0.188996	0.0235491	6.28643e-15	5.91895e-09
165	RBC	12	ENSMUSG00000028464	Tpm2	0.0496124	5.82386	0.981366	0.0505544	0.0921719	4.12008e-54	3.87924e-48
166	RBC	12	ENSMUSG00000032366	Tpm1	0.0433557	3.78191	0.947205	0.0457723	0.127744	1.37346e-74	1.29318e-68
167	RBC	12	ENSMUSG00000028906	Epb41	0.187546	0.819807	0.562112	0.333645	0.172188	2.16498e-100	2.03843e-94
168	RBC	12	ENSMUSG00000029922	Mkrn1	0.324583	2.1186	0.645963	0.50248	0.316113	8.86531e-186	8.34709e-180
169	RBC	12	ENSMUSG00000030878	Cdr2	0.0538174	0.222523	0.276398	0.19471	0.0275081	3.45567e-17	3.25367e-11
170	RBC	12	ENSMUSG00000031812	Map1lc3b	0.05024	0.0989392	0.226708	0.221606	0.0407253	1.01271e-24	9.53511e-19
171	RBC	12	ENSMUSG00000031950	Gabarapl2	0.104177	0.265281	0.400621	0.26004	0.0966407	1.12316e-56	1.05751e-50
172	RBC	12	ENSMUSG00000034248	Slc25a37	0.309096	1.23337	0.680124	0.45447	0.297178	2.23313e-174	2.1026e-168
173	RBC	12	ENSMUSG00000039236	Isg20	0.184561	0.292372	0.416149	0.443498	0.158791	1.38097e-92	1.30024e-86
174	RBC	12	ENSMUSG00000035783	Acta2	0.0440875	6.04453	0.978261	0.0450672	0.123844	2.45541e-72	2.31187e-66
175	RBC	12	ENSMUSG00000038871	Bpgm	0.376451	2.48922	0.664596	0.566435	0.347131	1.43741e-204	1.35338e-198
176	RBC	12	ENSMUSG00000044792	Isca1	0.149931	0.310245	0.428571	0.349838	0.121844	3.50202e-71	3.2973e-65
177	RBC	12	ENSMUSG00000047139	Cd24a	0.0516219	0.365898	0.391304	0.131923	0.0200521	6.27525e-13	5.90843e-07
178	RBC	12	ENSMUSG00000023572	Ccndbp1	0.0988863	0.24367	0.31677	0.31217	0.081267	7.30967e-48	6.88239e-42
179	RBC	12	ENSMUSG00000073400	Trim10	0.0486182	0.0391881	0.068323	0.711594	0.0486261	3.18812e-29	3.00176e-23
180	RBC	12	ENSMUSG00000035242	Oaz1	0.0464371	0.346644	0.484472	0.0958509	0.00897613	1.50624e-06	1
181	RBC	12	ENSMUSG00000044468	Tent5c	0.379532	1.0885	0.602484	0.629946	0.33563	1.38407e-197	1.30316e-191
182	RBC	12	ENSMUSG00000051839	Gypa	0.0957435	0.107999	0.161491	0.592873	0.0831152	6.39215e-49	6.01849e-43
183	RBC	12	ENSMUSG00000079557	2022-03-02	0.124952	0.637284	0.562112	0.222291	0.0964218	1.49999e-56	1.41231e-50
184	RBC	12	ENSMUSG00000025270	Alas2	0.600955	2.37084	0.801242	0.750029	0.571939	0	0
185	RBC	12	ENSMUSG00000059430	Actg2	0.0453429	6.42475	0.981366	0.0462038	0.10519	1.37361e-61	1.29332e-55
186	RBC	12	ENSMUSG00000020802	Ube2o	0.0873763	0.266425	0.326087	0.267954	0.0658894	4.52881e-39	4.26408e-33
187	RBC	12	ENSMUSG00000018830	Myh11	0.0442805	3.46713	0.947205	0.0467486	0.0989736	5.1377e-58	4.83738e-52
188	RBC	12	ENSMUSG00000069917	Hba-a2	0.678135	172.825	1	0.678135	0.936271	0	0
189	RBC	12	ENSMUSG00000069919	Hba-a1	0.67755	239.329	1	0.67755	0.93204	0	0
190	RBC	12	ENSMUSG00000050708	Ftl1	0.0972805	2.04431	0.860248	0.113084	0.0630287	1.94636e-37	1.83259e-31
191	RBC	12	ENSMUSG00000073940	Hbb-bt	0.656988	104.433	0.993789	0.661094	0.795047	0	0
192	RBC	12	ENSMUSG00000074269	Rec114	0.133434	0.120335	0.226708	0.588571	0.107965	3.48057e-63	3.27711e-57
193	RBC	12	ENSMUSG00000027078	Ube2l6	0.341947	0.935722	0.664596	0.514519	0.352132	1.30224e-207	1.22612e-201
194	RBC	12	ENSMUSG00000078974	Sec61g	0.0482439	0.292311	0.39441	0.122319	0.0215179	9.10291e-14	8.5708e-08
195	RBC	12	ENSMUSG00000060126	Tpt1	0.0508788	2.03193	0.89441	0.0568854	0.0152606	3.50758e-10	0.000330254
196	RBC	12	ENSMUSG00000056234	Ncoa4	0.0477575	0.209954	0.279503	0.170866	0.0246055	1.56707e-15	1.47546e-09
197	RBC	12	ENSMUSG00000025889	Snca	0.418236	1.30769	0.602484	0.694186	0.375279	9.5942e-222	9.03337e-216
198	RBC	12	ENSMUSG00000033685	Ucp2	0.0606717	0.376505	0.459627	0.132002	0.0491013	1.70873e-29	1.60884e-23
199	RBC	12	ENSMUSG00000091694	Apol11b	0.0530048	0.0593903	0.0745342	0.711148	0.0401634	2.11632e-24	1.99261e-18
200	RBC	12	ENSMUSG00000106106	CT010467.1	0.069885	12.3957	0.984472	0.0709873	0.190143	6.90142e-111	6.49799e-105
201	Endothelial	14	ENSMUSG00000001029	Icam2	0.297879	0.444554	0.440433	0.676331	0.250128	1.11319e-131	1.04812e-125
202	Endothelial	14	ENSMUSG00000001946	Esam	0.397173	1.3762	0.714801	0.555641	0.402023	6.89782e-214	6.49461e-208
203	Endothelial	14	ENSMUSG00000022220	Adcy4	0.333094	0.528201	0.505415	0.65905	0.277266	3.59811e-146	3.38778e-140
204	Endothelial	14	ENSMUSG00000004655	Aqp1	0.390363	4.30977	0.649819	0.600725	0.314267	4.60402e-166	4.33489e-160
205	Endothelial	14	ENSMUSG00000026814	Eng	0.296539	1.95572	0.790614	0.375075	0.345267	7.47427e-183	7.03736e-177
206	Endothelial	14	ENSMUSG00000030123	Plxnd1	0.277241	0.75979	0.570397	0.48605	0.25625	6.09665e-135	5.74027e-129
207	Endothelial	14	ENSMUSG00000015468	Notch4	0.283156	0.350535	0.411552	0.68802	0.221794	1.22418e-116	1.15262e-110
208	Endothelial	14	ENSMUSG00000017309	Cd300lg	0.308199	0.559546	0.418773	0.735958	0.252914	3.65284e-133	3.43932e-127
209	Endothelial	14	ENSMUSG00000020427	Igfbp3	0.297517	1.37064	0.458484	0.648914	0.247936	1.63513e-130	1.53955e-124
210	Endothelial	14	ENSMUSG00000020846	Rflnb	0.289287	1.18436	0.592058	0.488612	0.279385	2.63499e-147	2.48096e-141
211	Endothelial	14	ENSMUSG00000021367	Edn1	0.286466	0.764897	0.429603	0.666815	0.236307	2.48289e-124	2.33776e-118
212	Endothelial	14	ENSMUSG00000044258	Ctla2a	0.40521	1.57673	0.620939	0.652577	0.38344	1.10431e-203	1.03976e-197
213	Endothelial	14	ENSMUSG00000022579	Gpihbp1	0.53656	2.789	0.685921	0.782248	0.473488	1.58143e-253	1.48899e-247
214	Endothelial	14	ENSMUSG00000024140	Epas1	0.388613	1.21079	0.66787	0.58187	0.397114	3.45186e-211	3.25008e-205
215	Endothelial	14	ENSMUSG00000025608	Podxl	0.291842	1.24434	0.638989	0.456725	0.27156	4.07254e-143	3.83448e-137
216	Endothelial	14	ENSMUSG00000025902	Sox17	0.316957	0.326943	0.389892	0.812936	0.248123	1.29978e-130	1.2238e-124
217	Endothelial	14	ENSMUSG00000062515	Fabp4	0.574836	10.4903	0.848375	0.677573	0.473542	1.47509e-253	1.38887e-247
218	Endothelial	14	ENSMUSG00000029648	Flt1	0.620936	1.93493	0.736462	0.843134	0.56534	1.98475e-305	1.86873e-299
219	Endothelial	14	ENSMUSG00000031871	Cdh5	0.589857	1.7928	0.736462	0.800934	0.570017	4.2228e-308	3.97596e-302
220	Endothelial	14	ENSMUSG00000024451	Arap3	0.390474	0.671147	0.588448	0.663566	0.360735	2.84528e-191	2.67896e-185
221	Endothelial	14	ENSMUSG00000041378	Cldn5	0.338246	0.782287	0.440433	0.767984	0.246742	7.06155e-130	6.64877e-124
222	Endothelial	14	ENSMUSG00000039167	Adgrl4	0.455679	0.806702	0.555957	0.81963	0.398753	4.33694e-212	4.08343e-206
223	Endothelial	14	ENSMUSG00000033191	Tie1	0.412433	0.640272	0.574007	0.718515	0.344414	2.17441e-182	2.0473e-176
224	Endothelial	14	ENSMUSG00000034911	Ushbp1	0.466234	0.778191	0.574007	0.812245	0.380718	3.42101e-202	3.22104e-196
225	Endothelial	14	ENSMUSG00000045377	Tmem88	0.319185	0.429117	0.444043	0.718816	0.268053	3.05172e-141	2.87333e-135
226	Endothelial	14	ENSMUSG00000046916	Myct1	0.377889	0.434747	0.465704	0.811436	0.315296	1.28158e-166	1.20666e-160
227	Endothelial	14	ENSMUSG00000047867	Gimap6	0.278852	0.459404	0.469314	0.59417	0.236858	1.26474e-124	1.19081e-118
228	Endothelial	14	ENSMUSG00000045092	S1pr1	0.349834	0.672593	0.530686	0.659211	0.340266	3.8904e-180	3.66299e-174
229	Endothelial	14	ENSMUSG00000044338	Aplnr	0.292118	0.443681	0.379061	0.770636	0.246188	1.39245e-129	1.31105e-123
230	Endothelial	14	ENSMUSG00000044562	Rasip1	0.400602	0.628459	0.519856	0.770602	0.313829	7.93317e-166	7.46943e-160
231	Endothelial	14	ENSMUSG00000027684	Mecom	0.392509	0.54478	0.483755	0.811381	0.33339	2.08844e-176	1.96636e-170
232	Endothelial	14	ENSMUSG00000052921	Arhgef15	0.330642	0.514927	0.483755	0.683491	0.26155	9.07173e-138	8.54144e-132
233	Endothelial	14	ENSMUSG00000079018	Ly6c1	0.412798	2.18352	0.66426	0.62144	0.385782	5.74588e-205	5.41e-199
234	Endothelial	14	ENSMUSG00000020717	Pecam1	0.654472	2.15814	0.801444	0.816616	0.626026	0	0
235	Endothelial	14	ENSMUSG00000061353	Cxcl12	0.305318	2.59046	0.66787	0.457152	0.268539	1.67867e-141	1.58055e-135
236	Endothelial	14	ENSMUSG00000002944	Cd36	0.439373	2.14764	0.711191	0.617799	0.454609	5.40066e-243	5.08496e-237
237	Endothelial	14	ENSMUSG00000037936	Scarb1	0.277574	0.922673	0.584838	0.474617	0.261478	9.9187e-138	9.3389e-132
238	Endothelial	14	ENSMUSG00000068079	Tcf15	0.303925	0.410565	0.411552	0.738485	0.251495	2.08334e-132	1.96156e-126
239	Endothelial	14	ENSMUSG00000020154	Ptprb	0.688434	2.9959	0.833935	0.825525	0.647245	0	0
240	Endothelial	14	ENSMUSG00000031442	Mcf2l	0.325534	0.915861	0.555957	0.585539	0.309368	2.0235e-163	1.90522e-157
241	Endothelial	14	ENSMUSG00000027435	Cd93	0.543706	2.31686	0.808664	0.67235	0.584408	2.42577245053954e-316	2.28397392194325e-310
242	Endothelial	14	ENSMUSG00000026921	Egfl7	0.451413	1.25598	0.66065	0.683287	0.444298	2.92747e-237	2.75635e-231
243	Endothelial	14	ENSMUSG00000001930	Vwf	0.322715	0.824836	0.425993	0.757559	0.240506	1.46068e-126	1.37529e-120
244	Endothelial	14	ENSMUSG00000032125	Robo4	0.414187	0.707597	0.563177	0.735447	0.387144	1.02846e-205	9.68339e-200
245	Endothelial	14	ENSMUSG00000001240	Ramp2	0.342148	1.33107	0.65704	0.520741	0.323598	4.1839e-171	3.93933e-165
246	Endothelial	14	ENSMUSG00000041445	Mmrn2	0.493304	0.98102	0.635379	0.776393	0.430914	7.76339e-230	7.30958e-224
247	Endothelial	14	ENSMUSG00000062960	Kdr	0.392088	1.13792	0.624549	0.627795	0.354594	6.30921e-188	5.9404e-182
248	Endothelial	14	ENSMUSG00000056492	Adgrf5	0.427796	1.31503	0.65704	0.651096	0.393921	1.96293e-209	1.84819e-203
249	Endothelial	14	ENSMUSG00000041134	Cyyr1	0.408177	0.607907	0.505415	0.807607	0.341359	9.91649e-181	9.33683e-175
250	Endothelial	14	ENSMUSG00000054690	Emcn	0.462698	0.920357	0.595668	0.776772	0.388207	2.68619e-206	2.52917e-200
251	ICC	15	ENSMUSG00000005087	Cd44	0.105741	0.662762	0.430712	0.245504	0.100874	4.42137e-52	4.16292e-46
252	ICC	15	ENSMUSG00000005672	Kit	0.472436	6.92412	0.947566	0.498579	0.664926	0	0
253	ICC	15	ENSMUSG00000019943	Atp2b1	0.115707	1.81509	0.749064	0.154469	0.0929227	4.44411e-48	4.18433e-42
254	ICC	15	ENSMUSG00000020788	Atp2a3	0.192846	1.45132	0.666667	0.289268	0.220551	5.08512e-113	4.78787e-107
255	ICC	15	ENSMUSG00000020902	Ntn1	0.113944	0.710117	0.441948	0.257822	0.102443	7.16397e-53	6.7452e-47
256	ICC	15	ENSMUSG00000025203	Scd2	0.145023	1.70021	0.681648	0.212754	0.106129	9.94083e-55	9.35974e-49
257	ICC	15	ENSMUSG00000025790	Slco3a1	0.187651	1.57331	0.696629	0.269369	0.193029	6.99413e-99	6.58529e-93
258	ICC	15	ENSMUSG00000025969	Nrp2	0.104588	1.47632	0.636704	0.164264	0.0624777	8.51057e-33	8.01309e-27
259	ICC	15	ENSMUSG00000026223	Itm2c	0.110285	1.36733	0.588015	0.187555	0.0718283	1.74828e-37	1.64609e-31
260	ICC	15	ENSMUSG00000026235	Epha4	0.130357	0.55288	0.397004	0.328352	0.130986	2.7549e-67	2.59386e-61
261	ICC	15	ENSMUSG00000026721	Rabgap1l	0.117413	0.719586	0.41573	0.282426	0.1287	3.95651e-66	3.72523e-60
262	ICC	15	ENSMUSG00000026778	Prkcq	0.153963	0.899714	0.531835	0.289493	0.258112	1.92228e-132	1.80991e-126
263	ICC	15	ENSMUSG00000027217	Tspan18	0.112502	0.581198	0.370787	0.303416	0.0890135	4.10802e-46	3.86788e-40
264	ICC	15	ENSMUSG00000027524	Edn3	0.218952	1.26884	0.569288	0.384606	0.32845	3.20025e-169	3.01318e-163
265	ICC	15	ENSMUSG00000028031	Dkk2	0.291346	1.58789	0.659176	0.441985	0.413698	1.55541e-214	1.46449e-208
266	ICC	15	ENSMUSG00000029426	Scarb2	0.127791	1.28495	0.595506	0.214593	0.10558	1.88091e-54	1.77096e-48
267	ICC	15	ENSMUSG00000029563	Foxp2	0.107439	0.610249	0.411985	0.260784	0.105844	1.38457e-54	1.30363e-48
268	ICC	15	ENSMUSG00000031075	Ano1	0.388303	4.61919	0.891386	0.435617	0.529856	1.21163e-277	1.1408e-271
269	ICC	15	ENSMUSG00000031842	Pde4c	0.279934	1.48788	0.610487	0.458542	0.39076	2.92666e-202	2.75558e-196
270	ICC	15	ENSMUSG00000038633	Degs1	0.104908	1.01433	0.520599	0.201514	0.0607694	6.10648e-32	5.74952e-26
271	ICC	15	ENSMUSG00000033161	Atp1a1	0.12064	4.45217	0.88015	0.137067	0.0806008	6.92398e-42	6.51924e-36
272	ICC	15	ENSMUSG00000042613	Pbxip1	0.139794	2.91867	0.82397	0.169659	0.0684894	8.25912e-36	7.77633e-30
273	ICC	15	ENSMUSG00000035967	Ints6l	0.204367	1.33953	0.565543	0.361365	0.20686	5.61257e-106	5.28448e-100
274	ICC	15	ENSMUSG00000025558	Dock9	0.104299	0.517957	0.367041	0.284162	0.121048	2.93243e-62	2.76102e-56
275	ICC	15	ENSMUSG00000026110	Mgat4a	0.127721	0.824815	0.483146	0.264353	0.158955	1.74989e-81	1.6476e-75
276	ICC	15	ENSMUSG00000041741	Pde3a	0.242446	2.62142	0.801498	0.302491	0.312557	7.29157e-161	6.86534e-155
277	ICC	15	ENSMUSG00000021276	Cinp	0.102921	0.352808	0.29588	0.347848	0.09209	1.16575e-47	1.09761e-41
278	ICC	15	ENSMUSG00000037852	Cpe	0.15678	3.58183	0.883895	0.177374	0.0895739	2.14717e-46	2.02166e-40
279	ICC	15	ENSMUSG00000050069	Grem2	0.289433	1.88331	0.71161	0.406729	0.352607	5.60124e-182	5.27382e-176
280	ICC	15	ENSMUSG00000044017	Adgrd1	0.401806	3.19342	0.838951	0.478938	0.494009	5.38657e-258	5.0717e-252
281	ICC	15	ENSMUSG00000045281	Gpr20	0.294045	2.61237	0.726592	0.404691	0.371692	4.20282e-192	3.95714e-186
282	ICC	15	ENSMUSG00000049265	Kcnk3	0.336094	3.05216	0.82397	0.407895	0.435797	2.03803e-226	1.91889e-220
283	ICC	15	ENSMUSG00000050953	Gja1	0.400979	6.22661	0.947566	0.423168	0.514483	3.37636e-269	3.17899e-263
284	ICC	15	ENSMUSG00000056427	Slit3	0.121536	0.84361	0.494382	0.245835	0.125438	1.76908e-64	1.66567e-58
285	ICC	15	ENSMUSG00000035566	Pcdh17	0.332874	3.85765	0.857678	0.38811	0.535785	6.58383e-281	6.19897e-275
286	ICC	15	ENSMUSG00000041220	Elovl6	0.256594	2.25417	0.76779	0.334198	0.340357	1.68188e-175	1.58357e-169
287	ICC	15	ENSMUSG00000020105	Lrig3	0.116368	0.400358	0.314607	0.369883	0.10901	3.50855e-56	3.30346e-50
288	ICC	15	ENSMUSG00000064272	Gpbar1	0.196463	0.694008	0.430712	0.456136	0.219706	1.38492e-112	1.30397e-106
289	ICC	15	ENSMUSG00000024112	Cacna1h	0.108177	0.577227	0.449438	0.240694	0.080762	5.7465e-42	5.41059e-36
290	ICC	15	ENSMUSG00000064345	mt-Nd2	0.106575	14.5168	0.977528	0.109025	7.40807e-05	0.68223	1
291	ICC	15	ENSMUSG00000064370	mt-Cytb	0.108869	26.5208	0.992509	0.10969	0.000451683	0.312025	1
292	ICC	15	ENSMUSG00000007097	Atp1a2	0.108901	0.571546	0.397004	0.274308	0.0868739	4.8878e-45	4.60208e-39
293	ICC	15	ENSMUSG00000004151	Etv1	0.371834	3.91014	0.838951	0.443213	0.491839	8.2447e-257	7.76275e-251
294	ICC	15	ENSMUSG00000057530	Ece1	0.105755	1.1997	0.554307	0.190788	0.101137	3.259e-52	3.06849e-46
295	ICC	15	ENSMUSG00000055632	Hmcn2	0.109652	1.44387	0.71161	0.15409	0.0730227	4.40072e-38	4.14347e-32
296	ICC	15	ENSMUSG00000034275	Igsf9b	0.262612	2.80522	0.805243	0.326127	0.293911	4.29109e-151	4.04026e-145
297	ICC	15	ENSMUSG00000024597	Slc12a2	0.269467	4.09746	0.868914	0.31012	0.313608	2.04576e-161	1.92618e-155
298	ICC	15	ENSMUSG00000034472	Rasd2	0.123193	0.554369	0.411985	0.299022	0.151171	1.59162e-77	1.49858e-71
299	ICC	15	ENSMUSG00000092341	Malat1	0.141553	58.164	0.992509	0.142621	0.0657111	2.03994e-34	1.92069e-28
300	ICC	15	ENSMUSG00000097971	Gm26917	0.138875	12.3249	0.850187	0.163347	0.0930305	3.92231e-48	3.69304e-42
301	Macrophage	16	ENSMUSG00000035352	Ccl12	0.408966	2.22283	0.52381	0.780753	0.315019	4.57929e-146	4.31161e-140
302	Macrophage	16	ENSMUSG00000000682	Cd52	0.515587	1.20656	0.65368	0.788745	0.411673	5.2494e-192	4.94255e-186
303	Macrophage	16	ENSMUSG00000001128	Cfp	0.389931	0.911654	0.670996	0.581123	0.304519	3.99144e-141	3.75812e-135
304	Macrophage	16	ENSMUSG00000002111	Spi1	0.367605	0.509263	0.493506	0.744884	0.282862	5.76033e-131	5.42361e-125
305	Macrophage	16	ENSMUSG00000002985	Apoe	0.356446	18.5433	0.887446	0.401654	0.250564	6.86487e-116	6.46358e-110
306	Macrophage	16	ENSMUSG00000004730	Adgre1	0.417078	0.671388	0.549784	0.758621	0.30252	3.47371e-140	3.27065e-134
307	Macrophage	16	ENSMUSG00000015340	Cybb	0.438517	0.566153	0.532468	0.823557	0.324272	1.99057e-150	1.87421e-144
308	Macrophage	16	ENSMUSG00000018774	Cd68	0.43354	0.880321	0.614719	0.705265	0.349905	1.50085e-162	1.41311e-156
309	Macrophage	16	ENSMUSG00000021423	Ly86	0.463737	0.636054	0.554113	0.836901	0.352577	8.11721e-164	7.64272e-158
310	Macrophage	16	ENSMUSG00000024621	Csf1r	0.49208	1.55147	0.731602	0.672607	0.428765	3.21339e-200	3.02555e-194
311	Macrophage	16	ENSMUSG00000024672	Ms4a7	0.366772	0.454403	0.467532	0.784486	0.270786	2.55888e-125	2.4093e-119
312	Macrophage	16	ENSMUSG00000024677	Ms4a6b	0.405135	0.788409	0.5671	0.714399	0.35941	4.63468e-167	4.36376e-161
313	Macrophage	16	ENSMUSG00000025150	Cbr2	0.350744	0.880793	0.489177	0.717007	0.256667	9.87548e-119	9.29821e-113
314	Macrophage	16	ENSMUSG00000026126	Ptpn18	0.409737	0.704355	0.601732	0.68093	0.343381	1.85002e-159	1.74188e-153
315	Macrophage	16	ENSMUSG00000026712	Mrc1	0.599941	4.15476	0.757576	0.791922	0.537367	4.74944e-253	4.47181e-247
316	Macrophage	16	ENSMUSG00000028581	Laptm5	0.597457	1.8583	0.800866	0.746014	0.520871	5.95211e-245	5.60418e-239
317	Macrophage	16	ENSMUSG00000029373	Pf4	0.540841	4.75541	0.714286	0.757178	0.469129	1.008e-219	9.49079e-214
318	Macrophage	16	ENSMUSG00000008845	Cd163	0.433896	0.920042	0.545455	0.795477	0.357264	4.84433e-166	4.56115e-160
319	Macrophage	16	ENSMUSG00000030148	Clec4a2	0.387829	0.316559	0.467532	0.829524	0.292677	1.45042e-135	1.36564e-129
320	Macrophage	16	ENSMUSG00000030560	Ctsc	0.447669	1.84728	0.727273	0.615545	0.447385	3.38055e-209	3.18294e-203
321	Macrophage	16	ENSMUSG00000030579	Tyrobp	0.492372	1.65228	0.692641	0.710862	0.429609	1.26236e-200	1.18856e-194
322	Macrophage	16	ENSMUSG00000030707	Coro1a	0.414653	0.914778	0.632035	0.65606	0.328933	1.25593e-152	1.18251e-146
323	Macrophage	16	ENSMUSG00000030787	Lyve1	0.374207	1.50022	0.536797	0.697112	0.264218	2.97918e-122	2.80503e-116
324	Macrophage	16	ENSMUSG00000042286	Stab1	0.484397	3.14544	0.731602	0.662105	0.431967	9.24096e-202	8.70078e-196
325	Macrophage	16	ENSMUSG00000040747	Cd53	0.449093	0.426566	0.575758	0.780004	0.327039	9.84813e-152	9.27246e-146
326	Macrophage	16	ENSMUSG00000037443	Cep85	0.367069	1.7766	0.748918	0.490132	0.394859	5.93284e-184	5.58603e-178
327	Macrophage	16	ENSMUSG00000024965	Fermt3	0.360851	0.375458	0.52381	0.688898	0.262245	2.48013e-121	2.33516e-115
328	Macrophage	16	ENSMUSG00000040950	Mgl2	0.438696	1.16461	0.580087	0.75626	0.339959	7.70793e-158	7.25737e-152
329	Macrophage	16	ENSMUSG00000040552	C3ar1	0.369785	0.434931	0.510823	0.723901	0.296882	1.54388e-137	1.45363e-131
330	Macrophage	16	ENSMUSG00000018008	Cyth4	0.400051	0.59723	0.597403	0.669651	0.334689	2.3964e-155	2.25632e-149
331	Macrophage	16	ENSMUSG00000033220	Rac2	0.380659	0.486188	0.52381	0.726712	0.277665	1.55766e-128	1.4666e-122
332	Macrophage	16	ENSMUSG00000036887	C1qa	0.598041	8.83862	0.792208	0.754905	0.527853	2.23957e-248	2.10866e-242
333	Macrophage	16	ENSMUSG00000036896	C1qc	0.574313	5.72176	0.748918	0.766857	0.516917	5.14821e-243	4.84728e-237
334	Macrophage	16	ENSMUSG00000036905	C1qb	0.574915	7.04642	0.78355	0.733731	0.511514	2.26991e-240	2.13723e-234
335	Macrophage	16	ENSMUSG00000049130	C5ar1	0.356942	0.590839	0.47619	0.749578	0.301045	1.7134e-139	1.61325e-133
336	Macrophage	16	ENSMUSG00000049988	Lrrc25	0.37696	0.307562	0.493506	0.76384	0.281378	2.85212e-130	2.6854e-124
337	Macrophage	16	ENSMUSG00000048865	Arhgap30	0.364674	0.295154	0.528139	0.690489	0.321929	2.53565e-149	2.38743e-143
338	Macrophage	16	ENSMUSG00000052160	Pld4	0.476517	0.583936	0.575758	0.827635	0.340607	3.80575e-158	3.58328e-152
339	Macrophage	16	ENSMUSG00000052336	Cx3cr1	0.396656	1.08468	0.519481	0.763564	0.322098	2.11175e-149	1.98831e-143
340	Macrophage	16	ENSMUSG00000060063	Alox5ap	0.37691	0.606858	0.545455	0.691001	0.300432	3.32374e-139	3.12945e-133
341	Macrophage	16	ENSMUSG00000060791	Gmfg	0.352314	0.364972	0.489177	0.720217	0.27317	1.96839e-126	1.85333e-120
342	Macrophage	16	ENSMUSG00000058715	Fcer1g	0.544771	2.70829	0.766234	0.710972	0.484351	4.05286e-227	3.81595e-221
343	Macrophage	16	ENSMUSG00000015852	Fcrls	0.4302	1.14638	0.593074	0.725373	0.350556	7.37524e-163	6.94412e-157
344	Macrophage	16	ENSMUSG00000069516	Lyz2	0.517208	4.4104	0.748918	0.690608	0.412942	1.29248e-192	1.21693e-186
345	Macrophage	16	ENSMUSG00000020377	Ltc4s	0.383629	0.716482	0.532468	0.720475	0.285414	3.676e-132	3.46112e-126
346	Macrophage	16	ENSMUSG00000026395	Ptprc	0.492523	0.616542	0.614719	0.801217	0.356715	8.82956e-166	8.31343e-160
347	Macrophage	16	ENSMUSG00000021998	Lcp1	0.418018	0.852573	0.614719	0.680016	0.345967	1.10303e-160	1.03855e-154
348	Macrophage	16	ENSMUSG00000036908	Unc93b1	0.356274	0.829416	0.69697	0.511175	0.341217	1.95881e-158	1.84431e-152
349	Macrophage	16	ENSMUSG00000059498	Fcgr3	0.490769	0.959519	0.632035	0.776491	0.390571	6.64264e-182	6.25435e-176
350	Macrophage	16	ENSMUSG00000079419	Ms4a6c	0.370695	0.308182	0.441558	0.839516	0.265853	5.14138e-123	4.84084e-117
351	Fibroblasts	17	ENSMUSG00000020676	Ccl11	0.254897	0.243541	0.430435	0.592184	0.171183	5.78484e-79	5.44668e-73
352	Fibroblasts	17	ENSMUSG00000000753	Serpinf1	0.393993	1.50429	0.86087	0.457668	0.36999	1.52329e-171	1.43425e-165
353	Fibroblasts	17	ENSMUSG00000001506	Col1a1	0.333179	33.246	0.986957	0.337582	0.3827	1.40135e-177	1.31943e-171
354	Fibroblasts	17	ENSMUSG00000007805	Twist2	0.225957	0.0907035	0.408696	0.552873	0.128432	1.77176e-59	1.66819e-53
355	Fibroblasts	17	ENSMUSG00000001131	Timp1	0.229657	0.296827	0.613043	0.374617	0.160419	4.80154e-74	4.52087e-68
356	Fibroblasts	17	ENSMUSG00000029675	Eln	0.210502	5.62185	0.930435	0.226241	0.118023	9.39367e-55	8.84456e-49
357	Fibroblasts	17	ENSMUSG00000015354	Pcolce2	0.28396	0.301252	0.582609	0.487394	0.2443	1.2656e-112	1.19162e-106
358	Fibroblasts	17	ENSMUSG00000015568	Lpl	0.411083	1.72457	0.830435	0.495022	0.319804	7.47803e-148	7.0409e-142
359	Fibroblasts	17	ENSMUSG00000020363	Gfpt2	0.217654	0.178195	0.456522	0.476767	0.136466	3.95073e-63	3.71979e-57
360	Fibroblasts	17	ENSMUSG00000020810	Cygb	0.328996	2.03223	0.830435	0.396173	0.31542	8.56801e-146	8.06717e-140
361	Fibroblasts	17	ENSMUSG00000021186	Fbln5	0.278941	0.661694	0.756522	0.368716	0.237928	1.13066e-109	1.06457e-103
362	Fibroblasts	17	ENSMUSG00000022032	Scara5	0.232382	0.156189	0.430435	0.539876	0.153173	9.72358e-71	9.15519e-65
363	Fibroblasts	17	ENSMUSG00000022371	Col14a1	0.441265	2.07008	0.886957	0.497505	0.444805	2.76141e-207	2.59999e-201
364	Fibroblasts	17	ENSMUSG00000075602	Ly6a	0.29063	1.32395	0.76087	0.381971	0.303426	3.61001e-140	3.39899e-134
365	Fibroblasts	17	ENSMUSG00000024053	Emilin2	0.222077	0.218005	0.595652	0.37283	0.180416	3.43007e-83	3.22956e-77
366	Fibroblasts	17	ENSMUSG00000024076	Vit	0.287002	0.146598	0.491304	0.584164	0.191843	1.9732e-88	1.85785e-82
367	Fibroblasts	17	ENSMUSG00000024713	Pcsk5	0.226903	0.421493	0.678261	0.334536	0.204844	2.0888e-94	1.9667e-88
368	Fibroblasts	17	ENSMUSG00000025784	Clec3b	0.415983	2.1218	0.86087	0.483213	0.372584	8.95345e-173	8.43008e-167
369	Fibroblasts	17	ENSMUSG00000026586	Prrx1	0.377849	0.226745	0.569565	0.663399	0.251343	6.87173e-116	6.47004e-110
370	Fibroblasts	17	ENSMUSG00000026748	Plxdc2	0.255558	0.381701	0.630435	0.405368	0.169742	2.63836e-78	2.48414e-72
371	Fibroblasts	17	ENSMUSG00000026879	Gsn	0.477979	16.399	0.978261	0.488601	0.66099	1.4596281880392e-313	1.37431e-307
372	Fibroblasts	17	ENSMUSG00000026837	Col5a1	0.238569	2.20186	0.926087	0.257609	0.193955	2.1158e-89	1.99212e-83
373	Fibroblasts	17	ENSMUSG00000027204	Fbn1	0.322971	3.42086	0.943478	0.34232	0.305981	2.29247e-141	2.15846e-135
374	Fibroblasts	17	ENSMUSG00000029061	Mmp23	0.259758	0.719351	0.813043	0.319489	0.203106	1.31686e-93	1.23988e-87
375	Fibroblasts	17	ENSMUSG00000029661	Col1a2	0.334214	21.0459	0.995652	0.335674	0.387301	9.07907e-180	8.54835e-174
376	Fibroblasts	17	ENSMUSG00000029718	Pcolce	0.250303	2.88598	0.904348	0.276777	0.254781	1.74328e-117	1.64138e-111
377	Fibroblasts	17	ENSMUSG00000030116	Mfap5	0.416967	2.9143	0.86087	0.484355	0.364096	9.47206e-169	8.91837e-163
378	Fibroblasts	17	ENSMUSG00000031239	Itm2a	0.224282	0.874789	0.747826	0.299911	0.183935	8.36854e-85	7.87936e-79
379	Fibroblasts	17	ENSMUSG00000031375	Bgn	0.253948	3.31619	0.93913	0.270407	0.216251	1.16453e-99	1.09646e-93
380	Fibroblasts	17	ENSMUSG00000036545	Adamts2	0.322565	0.94491	0.821739	0.392539	0.286574	2.74689e-132	2.58632e-126
381	Fibroblasts	17	ENSMUSG00000064080	Fbln2	0.256896	1.48934	0.847826	0.303006	0.255979	4.84441e-118	4.56123e-112
382	Fibroblasts	17	ENSMUSG00000040181	Fmo1	0.271995	0.215626	0.569565	0.477548	0.171361	4.79301e-79	4.51284e-73
383	Fibroblasts	17	ENSMUSG00000038463	Olfml2b	0.220274	0.58726	0.795652	0.276847	0.180486	3.18694e-83	3.00065e-77
384	Fibroblasts	17	ENSMUSG00000006369	Fbln1	0.222489	2.50958	0.9	0.24721	0.183895	8.73046e-85	8.22013e-79
385	Fibroblasts	17	ENSMUSG00000032334	Loxl1	0.238516	1.1871	0.865217	0.275672	0.208144	6.33093e-96	5.96086e-90
386	Fibroblasts	17	ENSMUSG00000020053	Igf1	0.300057	1.79396	0.821739	0.365149	0.262158	6.51791e-121	6.13691e-115
387	Fibroblasts	17	ENSMUSG00000055172	C1ra	0.219758	0.449413	0.721739	0.304484	0.173639	4.35052e-80	4.09621e-74
388	Fibroblasts	17	ENSMUSG00000055653	Gpc3	0.2109	0.615509	0.808696	0.26079	0.190404	9.02893e-88	8.50114e-82
389	Fibroblasts	17	ENSMUSG00000056481	Cd248	0.335723	1.42404	0.847826	0.395981	0.273636	2.97244e-126	2.79868e-120
390	Fibroblasts	17	ENSMUSG00000060572	Mfap2	0.214635	0.59899	0.713043	0.301013	0.175044	9.89962e-81	9.32094e-75
391	Fibroblasts	17	ENSMUSG00000057098	Ebf1	0.337462	1.03453	0.852174	0.396002	0.3604	5.3328e-167	5.02107e-161
392	Fibroblasts	17	ENSMUSG00000028339	Col15a1	0.214822	1.34499	0.830435	0.258686	0.154723	1.91093e-71	1.79923e-65
393	Fibroblasts	17	ENSMUSG00000033327	Tnxb	0.238282	2.62318	0.93913	0.253726	0.188618	5.95819e-87	5.60991e-81
394	Fibroblasts	17	ENSMUSG00000029096	Htra3	0.303884	0.630212	0.734783	0.413569	0.220878	8.55299e-102	8.05302e-96
395	Fibroblasts	17	ENSMUSG00000026043	Col3a1	0.319258	23.9714	0.995652	0.320652	0.466943	5.83301e-218	5.49204e-212
396	Fibroblasts	17	ENSMUSG00000019929	Dcn	0.221233	11.7035	0.986957	0.224157	0.221342	5.22486e-102	4.91944e-96
397	Fibroblasts	17	ENSMUSG00000021614	Vcan	0.307545	1.11523	0.878261	0.350175	0.25181	4.16866e-116	3.92498e-110
398	Fibroblasts	17	ENSMUSG00000024011	Pi16	0.301079	0.748142	0.504348	0.596967	0.168566	9.09902e-78	8.56713e-72
399	Fibroblasts	17	ENSMUSG00000022816	Fstl1	0.211162	4.02911	0.943478	0.223812	0.168263	1.25204e-77	1.17886e-71
400	Fibroblasts	17	ENSMUSG00000038521	C1s1	0.223296	0.613353	0.765217	0.291807	0.188176	9.50458e-87	8.94899e-81
401	Unknown	19	ENSMUSG00000020447	Npc1l1	0.624	3.29764	0.862069	0.72384	0.603603	2.7067e-230	2.54848e-224
402	Unknown	19	ENSMUSG00000006345	Ggt1	0.581916	2.75586	0.885057	0.65749	0.538979	8.03542e-205	7.56571e-199
403	Unknown	19	ENSMUSG00000011034	Slc5a1	0.674186	7.70261	0.908046	0.742458	0.636604	2.10367e-243	1.9807e-237
404	Unknown	19	ENSMUSG00000018569	Cldn7	0.529705	6.80082	0.948276	0.558598	0.657236	1.23443e-251	1.16227e-245
405	Unknown	19	ENSMUSG00000021278	Amn	0.62763	2.42488	0.856322	0.732937	0.547695	3.05216e-208	2.87374e-202
406	Unknown	19	ENSMUSG00000021565	Slc6a19	0.661764	4.41604	0.856322	0.772798	0.597791	5.42006e-228	5.10323e-222
407	Unknown	19	ENSMUSG00000022824	Muc13	0.498651	12.6978	0.971264	0.513404	0.698134	4.9311e-268	4.64286e-262
408	Unknown	19	ENSMUSG00000023057	Fabp2	0.585736	8.54241	0.931034	0.629124	0.510844	8.19562e-194	7.71654e-188
409	Unknown	19	ENSMUSG00000023914	Mep1a	0.635603	3.10793	0.862069	0.737299	0.56165	9.96772e-214	9.38506e-208
410	Unknown	19	ENSMUSG00000024503	Spink1	0.571252	6.83123	0.936782	0.609803	0.599043	1.73252e-228	1.63124e-222
411	Unknown	19	ENSMUSG00000025467	Prap1	0.573256	1.43298	0.787356	0.728077	0.48391	2.54997e-183	2.40091e-177
412	Unknown	19	ENSMUSG00000025528	2010106E10Rik	0.554349	1.71994	0.793103	0.698962	0.478137	4.4633e-181	4.2024e-175
413	Unknown	19	ENSMUSG00000028158	Mttp	0.52396	2.00808	0.775862	0.675326	0.459573	7.07621e-174	6.66257e-168
414	Unknown	19	ENSMUSG00000068547	Clca4a	0.49922	1.42571	0.597701	0.835234	0.407835	6.42556e-154	6.04996e-148
415	Unknown	19	ENSMUSG00000029700	Slc13a1	0.482242	0.855799	0.643678	0.749197	0.374254	4.75439e-141	4.47647e-135
416	Unknown	19	ENSMUSG00000029727	Cyp3a13	0.584006	1.47192	0.827586	0.705674	0.490741	5.61785e-186	5.28946e-180
417	Unknown	19	ENSMUSG00000030364	Clec2h	0.515271	3.86476	0.91954	0.560357	0.616078	3.0542e-235	2.87567e-229
418	Unknown	19	ENSMUSG00000030492	Slc7a9	0.52123	1.16415	0.764368	0.68191	0.424977	1.63214e-160	1.53674e-154
419	Unknown	19	ENSMUSG00000031886	Ces2e	0.55465	2.68104	0.83908	0.661021	0.486808	1.90302e-184	1.79178e-178
420	Unknown	19	ENSMUSG00000032038	St3gal4	0.503924	3.33087	0.91954	0.548017	0.57834	2.63984e-220	2.48553e-214
421	Unknown	19	ENSMUSG00000032081	Apoc3	0.583277	4.55535	0.867816	0.67212	0.510115	1.57792e-193	1.48569e-187
422	Unknown	19	ENSMUSG00000032083	Apoa1	0.681392	64.0463	0.994253	0.68533	0.865688	0	0
423	Unknown	19	ENSMUSG00000032098	Treh	0.485054	0.723952	0.666667	0.727582	0.386101	1.39445e-145	1.31294e-139
424	Unknown	19	ENSMUSG00000034918	Cdhr2	0.571953	3.85958	0.87931	0.650456	0.577216	7.32864e-220	6.90025e-214
425	Unknown	19	ENSMUSG00000020609	Apob	0.693137	5.75919	0.91954	0.753786	0.645125	8.44697e-247	7.9532e-241
426	Unknown	19	ENSMUSG00000034427	Myo15b	0.479587	1.71623	0.850575	0.563839	0.437455	2.52057e-165	2.37323e-159
427	Unknown	19	ENSMUSG00000037390	Muc3	0.685119	11.0764	0.948276	0.722489	0.712223	1.04284e-273	9.81877e-268
428	Unknown	19	ENSMUSG00000035699	Slc51a	0.489984	3.45891	0.804598	0.60898	0.398782	1.92206e-150	1.80971e-144
429	Unknown	19	ENSMUSG00000054999	Naaladl1	0.619108	2.56738	0.844828	0.732822	0.530514	1.6674e-201	1.56993e-195
430	Unknown	19	ENSMUSG00000035000	Dpp4	0.521176	3.1429	0.856322	0.608621	0.507575	1.54601e-192	1.45564e-186
431	Unknown	19	ENSMUSG00000039062	Anpep	0.725502	14.9456	0.948276	0.765075	0.749398	9.61136e-289	9.04953e-283
432	Unknown	19	ENSMUSG00000045394	Epcam	0.559586	8.82271	0.936782	0.59735	0.699402	1.52291e-268	1.43389e-262
433	Unknown	19	ENSMUSG00000024292	Cyp4f14	0.631951	3.09313	0.885057	0.714022	0.549416	6.43703e-209	6.06075e-203
434	Unknown	19	ENSMUSG00000068587	Mgam	0.610538	5.60443	0.862069	0.708224	0.522957	1.51281e-198	1.42438e-192
435	Unknown	19	ENSMUSG00000020839	Tmigd1	0.548949	2.29411	0.787356	0.697205	0.469706	8.36296e-178	7.87411e-172
436	Unknown	19	ENSMUSG00000015405	Ace2	0.65449	6.43067	0.87931	0.744322	0.61464	1.13698e-234	1.07052e-228
437	Unknown	19	ENSMUSG00000091705	H2-Q2	0.532599	1.22373	0.758621	0.702063	0.446119	1.13557e-168	1.06919e-162
438	Unknown	19	ENSMUSG00000025497	Cdhr5	0.514434	4.56975	0.936782	0.549151	0.651174	3.25749e-249	3.06707e-243
439	Unknown	19	ENSMUSG00000024313	Mep1b	0.577411	2.46037	0.83908	0.688147	0.537691	2.57051e-204	2.42025e-198
440	Unknown	19	ENSMUSG00000025557	Slc15a1	0.650917	3.74243	0.862069	0.755063	0.603694	2.49118e-230	2.34556e-224
441	Unknown	19	ENSMUSG00000046697	Enpp7	0.515824	1.63051	0.735632	0.701198	0.41846	5.2753e-158	4.96694e-152
442	Unknown	19	ENSMUSG00000027790	Sis	0.572529	3.11561	0.810345	0.706525	0.475948	3.16153e-180	2.97673e-174
443	Unknown	19	ENSMUSG00000070777	Ceacam20	0.584634	0.9469	0.724138	0.807352	0.464704	7.27899e-176	6.8535e-170
444	Unknown	19	ENSMUSG00000029188	Slc34a2	0.598996	2.3373	0.752874	0.795612	0.506237	5.14459e-192	4.84386e-186
445	Unknown	19	ENSMUSG00000024887	Asah2	0.519687	2.016	0.781609	0.664894	0.465927	2.44181e-176	2.29907e-170
446	Unknown	19	ENSMUSG00000074195	Clca4b	0.664519	7.2878	0.902299	0.736473	0.640407	6.42293e-245	6.04748e-239
447	Unknown	19	ENSMUSG00000029134	Plb1	0.568961	3.60552	0.804598	0.707137	0.480779	4.20073e-182	3.95518e-176
448	Unknown	19	ENSMUSG00000078439	Smim24	0.529432	7.06983	0.908046	0.583045	0.572111	7.55568e-218	7.11401e-212
449	Unknown	19	ENSMUSG00000079440	Alpi	0.612223	1.61265	0.764368	0.800953	0.526477	6.34568e-200	5.97474e-194
450	Unknown	19	ENSMUSG00000035041	Creb3l3	0.491323	1.11591	0.695402	0.706531	0.38966	6.04264e-147	5.68942e-141
451	ICC	22	ENSMUSG00000000088	Cox5a	0.220525	1.93221	0.911111	0.24204	0.164017	2.87585e-22	2.70774e-16
452	ICC	22	ENSMUSG00000003955	Fam162a	0.268638	0.970687	0.888889	0.302218	0.187596	2.99024e-25	2.81545e-19
453	ICC	22	ENSMUSG00000005672	Kit	0.230627	2.89707	0.911111	0.253127	0.272403	5.49878e-36	5.17735e-30
454	ICC	22	ENSMUSG00000006941	Eif1b	0.31478	1.81098	0.911111	0.345491	0.24766	7.48908e-33	7.0513e-27
455	ICC	22	ENSMUSG00000021396	Nxnl2	0.229072	0.147442	0.488889	0.468557	0.12027	9.91697e-17	9.33727e-11
456	ICC	22	ENSMUSG00000024556	Me2	0.273172	0.734492	0.822222	0.332237	0.219948	2.41175e-29	2.27077e-23
457	ICC	22	ENSMUSG00000024601	Isoc1	0.271854	0.928764	0.866667	0.313677	0.211415	2.89803e-28	2.72863e-22
458	ICC	22	ENSMUSG00000025190	Got1	0.224375	0.695406	0.755556	0.296967	0.144343	8.87503e-20	8.35624e-14
459	ICC	22	ENSMUSG00000025488	Cox8b	0.221779	0.228413	0.555556	0.399201	0.111079	1.44956e-15	1.36483e-09
460	ICC	22	ENSMUSG00000025790	Slco3a1	0.217712	1.43451	0.866667	0.251206	0.175397	1.04472e-23	9.83656e-18
461	ICC	22	ENSMUSG00000026721	Rabgap1l	0.231309	0.770316	0.777778	0.297397	0.168676	7.4008e-23	6.96819e-17
462	ICC	22	ENSMUSG00000026778	Prkcq	0.447881	1.77052	0.911111	0.491577	0.437824	5.23979e-57	4.9335e-51
463	ICC	22	ENSMUSG00000027524	Edn3	0.354548	1.37287	0.866667	0.409094	0.357251	9.43322e-47	8.88181e-41
464	ICC	22	ENSMUSG00000027562	Car2	0.404319	1.27417	0.8	0.505399	0.328578	4.13299e-43	3.8914e-37
465	ICC	22	ENSMUSG00000028031	Dkk2	0.305574	1.31987	0.8	0.381968	0.286327	9.45704e-38	8.90423e-32
466	ICC	22	ENSMUSG00000028278	Rragd	0.335758	0.331276	0.688889	0.487391	0.188669	2.18785e-25	2.05996e-19
467	ICC	22	ENSMUSG00000029128	Rab28	0.247167	0.534848	0.733333	0.337046	0.142767	1.40518e-19	1.32304e-13
468	ICC	22	ENSMUSG00000029167	Ppargc1a	0.258167	0.316196	0.711111	0.363047	0.158964	1.25319e-21	1.17994e-15
469	ICC	22	ENSMUSG00000029563	Foxp2	0.256826	0.802632	0.8	0.321032	0.178335	4.44004e-24	4.18049e-18
470	ICC	22	ENSMUSG00000030246	Ldhb	0.305541	1.88777	0.866667	0.352547	0.223632	8.24371e-30	7.76183e-24
471	ICC	22	ENSMUSG00000030844	Rgs10	0.427946	3.5459	0.933333	0.458514	0.440399	2.46042e-57	2.31659e-51
472	ICC	22	ENSMUSG00000031075	Ano1	0.232312	2.37835	0.888889	0.261352	0.241775	4.16348e-32	3.92011e-26
473	ICC	22	ENSMUSG00000031367	Ap1s2	0.240239	0.663276	0.755556	0.317963	0.166098	1.56839e-22	1.47671e-16
474	ICC	22	ENSMUSG00000031613	Hpgd	0.227938	0.381914	0.755556	0.301683	0.150825	1.34257e-20	1.26409e-14
475	ICC	22	ENSMUSG00000031842	Pde4c	0.303709	1.09333	0.844444	0.359655	0.289976	3.25922e-38	3.0687e-32
476	ICC	22	ENSMUSG00000037335	Hand1	0.229273	0.575623	0.755556	0.30345	0.137792	5.98943e-19	5.63931e-13
477	ICC	22	ENSMUSG00000041741	Pde3a	0.294508	2.86012	0.911111	0.32324	0.28592	1.06471e-37	1.00247e-31
478	ICC	22	ENSMUSG00000035561	Aldh1b1	0.369134	1.14833	0.933333	0.395501	0.257469	4.28689e-34	4.0363e-28
479	ICC	22	ENSMUSG00000035615	Frmpd1	0.288525	0.186034	0.555556	0.519345	0.131029	4.30271e-18	4.05119e-12
480	ICC	22	ENSMUSG00000041012	Cmtm8	0.225261	0.192076	0.6	0.375435	0.125847	1.94954e-17	1.83558e-11
481	ICC	22	ENSMUSG00000050069	Grem2	0.257664	1.29711	0.844444	0.305129	0.235143	2.87786e-31	2.70964e-25
482	ICC	22	ENSMUSG00000048387	Osr1	0.254719	0.896604	0.844444	0.301641	0.201574	5.09754e-27	4.79956e-21
483	ICC	22	ENSMUSG00000049422	Chchd10	0.279639	3.13164	0.866667	0.32266	0.212607	2.0478e-28	1.92809e-22
484	ICC	22	ENSMUSG00000046093	Hpcal4	0.255026	0.303577	0.688889	0.370198	0.152365	8.57215e-21	8.07106e-15
485	ICC	22	ENSMUSG00000045281	Gpr20	0.274019	1.83533	0.888889	0.308272	0.277182	1.36371e-36	1.28399e-30
486	ICC	22	ENSMUSG00000053199	Arhgap20	0.224775	0.158863	0.533333	0.421454	0.11677	2.75335e-16	2.5924e-10
487	ICC	22	ENSMUSG00000049265	Kcnk3	0.295854	2.34744	0.888889	0.332836	0.286821	8.18684e-38	7.70828e-32
488	ICC	22	ENSMUSG00000050953	Gja1	0.218279	3.06159	0.888889	0.245564	0.21185	2.55298e-28	2.40374e-22
489	ICC	22	ENSMUSG00000035566	Pcdh17	0.341349	3.80553	0.888889	0.384017	0.378186	2.05708e-49	1.93683e-43
490	ICC	22	ENSMUSG00000041220	Elovl6	0.30852	2.2932	0.911111	0.33862	0.307883	1.74715e-40	1.64502e-34
491	ICC	22	ENSMUSG00000064272	Gpbar1	0.233238	0.420408	0.755556	0.308698	0.16998	5.06177e-23	4.76588e-17
492	ICC	22	ENSMUSG00000053279	Aldh1a1	0.266555	1.186	0.777778	0.342714	0.175942	8.91346e-24	8.39243e-18
493	ICC	22	ENSMUSG00000059173	Pde1a	0.220068	0.40928	0.777778	0.282945	0.140611	2.63388e-19	2.47992e-13
494	ICC	22	ENSMUSG00000004151	Etv1	0.252817	2.27821	0.866667	0.291712	0.270924	8.46715e-36	7.97221e-30
495	ICC	22	ENSMUSG00000074218	Cox7a1	0.283431	0.588086	0.711111	0.398575	0.179739	2.9492e-24	2.7768e-18
496	ICC	22	ENSMUSG00000041390	Mdfic	0.297375	0.744767	0.8	0.371719	0.241217	4.89966e-32	4.61325e-26
497	ICC	22	ENSMUSG00000034275	Igsf9b	0.237463	2.39093	0.822222	0.288806	0.191416	9.82839e-26	9.25387e-20
498	ICC	22	ENSMUSG00000024597	Slc12a2	0.224966	2.93733	0.933333	0.241035	0.20307	3.29607e-27	3.10339e-21
499	ICC	22	ENSMUSG00000034472	Rasd2	0.320784	0.811777	0.8	0.400979	0.243523	2.50171e-32	2.35547e-26
500	ICC	22	ENSMUSG00000087075	Lbhd2	0.374702	0.425397	0.644444	0.581434	0.212677	2.00673e-28	1.88943e-22
501	Unknown	25	ENSMUSG00000001247	Lsr	0.239631	0.396385	0.527778	0.454037	0.159046	3.06976e-18	2.89031e-12
502	Unknown	25	ENSMUSG00000013643	Lypd8	0.666809	9.16265	0.916667	0.727427	0.616602	1.53623e-66	1.44643e-60
503	Unknown	25	ENSMUSG00000018919	Tm4sf5	0.253696	1.4514	0.694444	0.365322	0.221449	8.39684e-25	7.906e-19
504	Unknown	25	ENSMUSG00000020581	Agr2	0.738441	15.2736	0.833333	0.886129	0.648549	6.13781e-70	5.77902e-64
505	Unknown	25	ENSMUSG00000021263	Degs2	0.235055	0.540061	0.5	0.470109	0.171752	1.41318e-19	1.33057e-13
506	Unknown	25	ENSMUSG00000022683	Pla2g10	0.304968	0.213518	0.333333	0.914903	0.191796	1.10185e-21	1.03744e-15
507	Unknown	25	ENSMUSG00000022824	Muc13	0.253228	5.99919	0.888889	0.284881	0.281979	3.61641e-31	3.40501e-25
508	Unknown	25	ENSMUSG00000023247	Guca2a	0.467292	4.86974	0.722222	0.64702	0.345496	7.43609e-38	7.00141e-32
509	Unknown	25	ENSMUSG00000024029	Tff3	0.82025	60.5648	0.944444	0.8685	0.784596	1.85353e-84	1.74518e-78
510	Unknown	25	ENSMUSG00000033200	Tpsg1	0.273055	0.231327	0.305556	0.893633	0.16394	9.37774e-19	8.82957e-13
511	Unknown	25	ENSMUSG00000025515	Muc2	0.883511	56.4101	1	0.883511	0.91935	6.41814e-99	6.04296e-93
512	Unknown	25	ENSMUSG00000026417	Pigr	0.397407	2.30515	0.777778	0.510952	0.300713	3.8628e-33	3.637e-27
513	Unknown	25	ENSMUSG00000026961	Lrrc26	0.415436	0.597356	0.5	0.830872	0.247648	1.47661e-27	1.39029e-21
514	Unknown	25	ENSMUSG00000027801	Tm4sf4	0.267918	1.62432	0.722222	0.370964	0.204083	5.62496e-23	5.29615e-17
515	Unknown	25	ENSMUSG00000028255	Clca1	0.815853	33.5859	0.888889	0.917835	0.743889	4.17593e-80	3.93182e-74
516	Unknown	25	ENSMUSG00000028415	Spink4	0.626124	18.6678	0.722222	0.86694	0.465155	1.74908e-50	1.64684e-44
517	Unknown	25	ENSMUSG00000028699	Tspan1	0.402493	0.547595	0.527778	0.762618	0.262404	4.14447e-29	3.9022e-23
518	Unknown	25	ENSMUSG00000029102	Hgfac	0.335563	0.432092	0.388889	0.862876	0.210273	1.25665e-23	1.18319e-17
519	Unknown	25	ENSMUSG00000030866	Ern2	0.441827	0.539334	0.472222	0.935634	0.33891	3.67379e-37	3.45904e-31
520	Unknown	25	ENSMUSG00000031608	Galnt7	0.233474	0.531006	0.527778	0.442372	0.154642	8.92467e-18	8.40298e-12
521	Unknown	25	ENSMUSG00000032226	Gcnt3	0.494388	1.43318	0.75	0.659184	0.411648	7.86212e-45	7.40254e-39
522	Unknown	25	ENSMUSG00000034127	Tspan8	0.317465	1.26142	0.666667	0.476198	0.292908	2.56049e-32	2.41082e-26
523	Unknown	25	ENSMUSG00000038991	Txndc5	0.259955	1.87477	0.75	0.346606	0.176361	4.62761e-20	4.3571e-14
524	Unknown	25	ENSMUSG00000040121	Rep15	0.231266	0.237991	0.361111	0.640428	0.139419	3.57564e-16	3.36662e-10
525	Unknown	25	ENSMUSG00000043501	Lgals2	0.220803	0.503924	0.5	0.441606	0.113435	1.96309e-13	1.84834e-07
526	Unknown	25	ENSMUSG00000039774	Galnt12	0.361223	0.61424	0.583333	0.61924	0.232179	6.25002e-26	5.88467e-20
527	Unknown	25	ENSMUSG00000038580	Sct	0.365946	0.49599	0.5	0.731891	0.245997	2.20231e-27	2.07357e-21
528	Unknown	25	ENSMUSG00000040412	5330417C22Rik	0.365257	0.361394	0.527778	0.692066	0.24459	3.09664e-27	2.91562e-21
529	Unknown	25	ENSMUSG00000037145	2210407C18Rik	0.218764	0.193309	0.25	0.875056	0.114241	1.61379e-13	1.51946e-07
530	Unknown	25	ENSMUSG00000044156	Hepacam2	0.600225	0.948775	0.694444	0.864323	0.485439	1.25122e-52	1.17808e-46
531	Unknown	25	ENSMUSG00000049350	Zg16	0.815605	222.07	0.916667	0.889751	0.750686	7.8422e-81	7.38379e-75
532	Unknown	25	ENSMUSG00000047501	Cldn4	0.217355	0.319807	0.333333	0.652065	0.142286	1.78423e-16	1.67993e-10
533	Unknown	25	ENSMUSG00000034107	Ano7	0.417235	0.412998	0.5	0.83447	0.278432	8.53975e-31	8.04055e-25
534	Unknown	25	ENSMUSG00000035506	Slc12a8	0.525025	0.724305	0.611111	0.859132	0.389892	1.55317e-42	1.46238e-36
535	Unknown	25	ENSMUSG00000044626	Liph	0.256005	0.387211	0.5	0.512009	0.174537	7.19814e-20	6.77737e-14
536	Unknown	25	ENSMUSG00000053964	Lgals4	0.252887	1.45585	0.75	0.337182	0.185333	5.26935e-21	4.96133e-15
537	Unknown	25	ENSMUSG00000054200	Ffar4	0.242799	0.228384	0.333333	0.728398	0.154861	8.46217e-18	7.96751e-12
538	Unknown	25	ENSMUSG00000063903	Klk1	0.496051	0.964589	0.583333	0.850372	0.322574	1.93045e-35	1.8176e-29
539	Unknown	25	ENSMUSG00000047730	Fcgbp	0.893427	90.8969	1	0.893427	0.891152	6.91793e-96	6.51354e-90
540	Unknown	25	ENSMUSG00000044860	Gm1123	0.544073	2.15967	0.722222	0.753331	0.453348	3.0974e-49	2.91634e-43
541	Unknown	25	ENSMUSG00000064213	Defa24	0.279582	2.27956	0.416667	0.670997	0.131036	2.73281e-15	2.57306e-09
542	Unknown	25	ENSMUSG00000046410	Kcnk6	0.232948	0.367283	0.5	0.465897	0.160416	2.20226e-18	2.07353e-12
543	Unknown	25	ENSMUSG00000070473	Cldn3	0.384513	1.34336	0.75	0.512683	0.305201	1.30201e-33	1.2259e-27
544	Unknown	25	ENSMUSG00000034112	Atp2c2	0.297395	0.223997	0.333333	0.892186	0.229124	1.3095e-25	1.23295e-19
545	Unknown	25	ENSMUSG00000071178	Serpina1b	0.46934	0.676148	0.527778	0.889276	0.382866	8.55587e-42	8.05574e-36
546	Unknown	25	ENSMUSG00000074227	Spint2	0.254439	2.10964	0.805556	0.315855	0.238886	1.23228e-26	1.16025e-20
547	Unknown	25	ENSMUSG00000075010	AW112010	0.28317	1.09253	0.583333	0.485434	0.221572	8.15037e-25	7.67394e-19
548	Unknown	25	ENSMUSG00000026828	Galnt5	0.245766	0.154775	0.305556	0.804324	0.189466	1.9369e-21	1.82367e-15
549	Unknown	25	ENSMUSG00000079445	B3gnt7	0.371032	0.556133	0.555556	0.667858	0.251445	5.88792e-28	5.54374e-22
550	Unknown	25	ENSMUSG00000094840	Muc3a	0.518698	1.13171	0.694444	0.746925	0.392494	8.2537e-43	7.77123e-37
551	SMC	3	ENSMUSG00000001506	Col1a1	0.155839	12.4095	0.974444	0.159926	0.215342	4.20036e-278	3.95483e-272
552	SMC	3	ENSMUSG00000017009	Sdc4	0.146894	2.66013	0.6892	0.213137	0.133533	1.4904e-169	1.40328e-163
553	SMC	3	ENSMUSG00000019326	Aoc3	0.104363	1.05485	0.403957	0.258352	0.086024	1.28178e-108	1.20685e-102
554	SMC	3	ENSMUSG00000018566	Slc2a4	0.144699	1.37437	0.483924	0.299011	0.134067	3.0162e-170	2.83988e-164
555	SMC	3	ENSMUSG00000000555	Itga5	0.201216	3.38402	0.774114	0.25993	0.150569	9.0606e-192	8.53096e-186
556	SMC	3	ENSMUSG00000022836	Mylk	0.112132	2.39001	0.70981	0.157975	0.0281705	2.80787e-36	2.64373e-30
557	SMC	3	ENSMUSG00000025780	Itih5	0.12525	2.29233	0.588623	0.212784	0.092446	9.04036e-117	8.51191e-111
558	SMC	3	ENSMUSG00000026208	Des	0.123816	12.0415	0.978566	0.126528	0.0121099	1.87293e-16	1.76344e-10
559	SMC	3	ENSMUSG00000026421	Csrp1	0.11951	5.25651	0.916735	0.130365	0.0108545	6.67552e-15	6.2853e-09
560	SMC	3	ENSMUSG00000027861	Casq2	0.132181	1.01771	0.401484	0.329231	0.131394	8.89137e-167	8.37162e-161
561	SMC	3	ENSMUSG00000028108	Ecm1	0.118748	1.43424	0.459192	0.258601	0.0905985	2.01392e-114	1.8962e-108
562	SMC	3	ENSMUSG00000028461	Ccdc107	0.129716	1.84437	0.59357	0.218536	0.089496	5.05789e-113	4.76223e-107
563	SMC	3	ENSMUSG00000028464	Tpm2	0.120838	17.8223	0.991756	0.121843	0.019506	1.39459e-25	1.31307e-19
564	SMC	3	ENSMUSG00000032366	Tpm1	0.114303	12.2378	0.988458	0.115637	0.0150762	4.07286e-20	3.83478e-14
565	SMC	3	ENSMUSG00000028763	Hspg2	0.135873	2.503	0.710635	0.191199	0.101067	9.37126e-128	8.82346e-122
566	SMC	3	ENSMUSG00000028776	Tinagl1	0.228002	2.58067	0.648805	0.351419	0.256002	0	0
567	SMC	3	ENSMUSG00000029309	Sparcl1	0.229447	7.85482	0.93075	0.246518	0.305847	0	0
568	SMC	3	ENSMUSG00000029661	Col1a2	0.141487	7.34496	0.936521	0.151077	0.168116	7.33114e-215	6.9026e-209
569	SMC	3	ENSMUSG00000031502	Col4a1	0.16825	2.4419	0.613355	0.274311	0.201229	4.91638e-259	4.62899e-253
570	SMC	3	ENSMUSG00000031503	Col4a2	0.234042	6.17024	0.903545	0.259026	0.317625	0	0
571	SMC	3	ENSMUSG00000032085	Tagln	0.129026	4.98875	0.924155	0.139615	0.0224764	3.01674e-29	2.84039e-23
572	SMC	3	ENSMUSG00000033306	Lpp	0.123376	2.35729	0.657049	0.187773	0.0541873	1.40243e-68	1.32045e-62
573	SMC	3	ENSMUSG00000042613	Pbxip1	0.159117	3.75387	0.774938	0.205328	0.158796	1.43426e-202	1.35042e-196
574	SMC	3	ENSMUSG00000035783	Acta2	0.16014	30.4838	1	0.16014	0.169805	4.27331e-217	4.02351e-211
575	SMC	3	ENSMUSG00000032679	Cd59a	0.203298	3.34564	0.755977	0.268921	0.18583	2.15294e-238	2.02709e-232
576	SMC	3	ENSMUSG00000026463	Atp2b4	0.267145	5.31655	0.882935	0.302565	0.323974	0	0
577	SMC	3	ENSMUSG00000037852	Cpe	0.121018	3.13442	0.755153	0.160256	0.0878403	6.38257e-111	6.00947e-105
578	SMC	3	ENSMUSG00000026193	Fn1	0.290931	7.39767	0.906843	0.320817	0.348928	0	0
579	SMC	3	ENSMUSG00000042284	Itga1	0.267416	5.0479	0.851608	0.314014	0.320904	0	0
580	SMC	3	ENSMUSG00000023175	Bsg	0.109379	3.18422	0.76587	0.142817	0.0361301	3.98599e-46	3.75299e-40
581	SMC	3	ENSMUSG00000031996	Aplp2	0.116163	2.3123	0.635614	0.182757	0.0875386	1.54055e-110	1.4505e-104
582	SMC	3	ENSMUSG00000063275	Hacd1	0.11768	1.23169	0.450948	0.260961	0.0791261	6.83658e-100	6.43695e-94
583	SMC	3	ENSMUSG00000059430	Actg2	0.19504	40.7271	1	0.19504	0.293203	0	0
584	SMC	3	ENSMUSG00000063873	Slc24a3	0.12015	1.34734	0.474031	0.253464	0.10252	1.30691e-129	1.23051e-123
585	SMC	3	ENSMUSG00000064337	mt-Rnr1	0.12015	14.1145	0.990107	0.12135	0.0689191	4.95447e-87	4.66485e-81
586	SMC	3	ENSMUSG00000064339	mt-Rnr2	0.122318	60.1499	1	0.122318	0.130057	4.79889e-165	4.51837e-159
587	SMC	3	ENSMUSG00000064341	mt-Nd1	0.164526	21.8772	0.999176	0.164662	0.251293	0	0
588	SMC	3	ENSMUSG00000064345	mt-Nd2	0.165214	24.9499	1	0.165214	0.250843	0	0
589	SMC	3	ENSMUSG00000064351	mt-Co1	0.13778	7.10988	0.949711	0.145075	0.141922	1.81325e-180	1.70725e-174
590	SMC	3	ENSMUSG00000064356	mt-Atp8	0.142925	4.96976	0.883759	0.161724	0.0838514	7.24095e-106	6.81768e-100
591	SMC	3	ENSMUSG00000064363	mt-Nd4	0.16282	21.6292	0.997527	0.163223	0.258283	0	0
592	SMC	3	ENSMUSG00000064367	mt-Nd5	0.142647	4.55256	0.865622	0.164791	0.0951526	3.25748e-120	3.06706e-114
593	SMC	3	ENSMUSG00000064368	mt-Nd6	0.125797	3.47324	0.80709	0.155865	0.0692341	1.99093e-87	1.87455e-81
594	SMC	3	ENSMUSG00000064370	mt-Cytb	0.157439	42.4515	1	0.157439	0.257042	0	0
595	SMC	3	ENSMUSG00000067818	Myl9	0.111982	9.64994	0.974444	0.114919	0.00992799	9.35475e-14	8.80792e-08
596	SMC	3	ENSMUSG00000025809	Itgb1	0.255088	9.64782	0.964551	0.264463	0.422618	0	0
597	SMC	3	ENSMUSG00000018830	Myh11	0.135625	13.5315	0.995054	0.136299	0.04476	7.77412e-57	7.31968e-51
598	SMC	3	ENSMUSG00000070436	Serpinh1	0.147837	4.62887	0.866447	0.170624	0.141447	7.52955e-180	7.08941e-174
599	SMC	3	ENSMUSG00000022816	Fstl1	0.105875	2.54072	0.671063	0.157771	0.0665577	4.58333e-84	4.31541e-78
600	SMC	3	ENSMUSG00000101939	Gm28438	0.151074	7.3997	0.936521	0.161314	0.120771	4.86167e-153	4.57748e-147
601	Fibroblasts	4	ENSMUSG00000029231	Pdgfra	0.315892	4.83189	0.832146	0.379611	0.496345	0	0
602	Fibroblasts	4	ENSMUSG00000000794	Kcnn3	0.253105	1.45278	0.625636	0.404557	0.357175	0	0
603	Fibroblasts	4	ENSMUSG00000001119	Col6a1	0.188663	3.98032	0.84944	0.222103	0.224856	1.92826e-261	1.81554e-255
604	Fibroblasts	4	ENSMUSG00000020241	Col6a2	0.207194	3.83612	0.821974	0.252069	0.23899	1.07652e-278	1.01359e-272
605	Fibroblasts	4	ENSMUSG00000001506	Col1a1	0.171941	13.9467	0.983723	0.174786	0.230743	1.30162e-268	1.22554e-262
606	Fibroblasts	4	ENSMUSG00000002847	Pla1a	0.144942	0.459789	0.321465	0.45088	0.182869	6.90874e-211	6.50489e-205
607	Fibroblasts	4	ENSMUSG00000002900	Lamb1	0.181419	1.81384	0.667345	0.271853	0.220597	2.89355e-256	2.72441e-250
608	Fibroblasts	4	ENSMUSG00000029675	Eln	0.239439	7.46096	0.854527	0.280201	0.261007	8.19506e-306	7.71602e-300
609	Fibroblasts	4	ENSMUSG00000018593	Sparc	0.142852	14.3865	0.989827	0.14432	0.135535	4.19807e-155	3.95267e-149
610	Fibroblasts	4	ENSMUSG00000019966	Kitl	0.131883	1.15499	0.563581	0.234009	0.13932	1.61577e-159	1.52132e-153
611	Fibroblasts	4	ENSMUSG00000020695	Mrc2	0.176966	0.849094	0.480163	0.368554	0.246352	9.94202e-288	9.36086e-282
612	Fibroblasts	4	ENSMUSG00000022860	Chodl	0.163483	0.835727	0.424212	0.38538	0.200417	6.87727e-232	6.47526e-226
613	Fibroblasts	4	ENSMUSG00000023224	Serping1	0.128915	1.48981	0.585961	0.220005	0.143154	5.34026e-164	5.0281e-158
614	Fibroblasts	4	ENSMUSG00000023886	Smoc2	0.167009	1.92367	0.696846	0.239665	0.182355	2.83527e-210	2.66954e-204
615	Fibroblasts	4	ENSMUSG00000023913	Pla2g7	0.15784	0.639637	0.390641	0.404055	0.209973	2.10606e-243	1.98295e-237
616	Fibroblasts	4	ENSMUSG00000025969	Nrp2	0.145247	1.97876	0.708037	0.20514	0.180646	3.07671e-208	2.89686e-202
617	Fibroblasts	4	ENSMUSG00000026478	Lamc1	0.1289	1.4027	0.63174	0.20404	0.11667	3.26193e-133	3.07125e-127
618	Fibroblasts	4	ENSMUSG00000028364	Tnc	0.348308	5.80436	0.858596	0.405671	0.432928	0	0
619	Fibroblasts	4	ENSMUSG00000029163	Emilin1	0.215767	2.42649	0.765005	0.282046	0.266883	4.21724390308045e-313	3.97072e-307
620	Fibroblasts	4	ENSMUSG00000029467	Atp2a2	0.184583	3.55788	0.830112	0.22236	0.186149	8.47223e-215	7.97698e-209
621	Fibroblasts	4	ENSMUSG00000029661	Col1a2	0.17496	9.38078	0.961343	0.181996	0.217202	3.78928e-252	3.56778e-246
622	Fibroblasts	4	ENSMUSG00000030218	Mgp	0.359323	14.551	0.940997	0.381853	0.498069	0	0
623	Fibroblasts	4	ENSMUSG00000030605	Mfge8	0.142195	1.10613	0.561546	0.253221	0.147695	2.57678e-169	2.42616e-163
624	Fibroblasts	4	ENSMUSG00000031375	Bgn	0.21386	3.42902	0.771109	0.277341	0.256913	9.51605e-301	8.95979e-295
625	Fibroblasts	4	ENSMUSG00000031740	Mmp2	0.160459	1.00219	0.498474	0.321901	0.193535	1.24324e-223	1.17056e-217
626	Fibroblasts	4	ENSMUSG00000036446	Lum	0.287985	6.09549	0.869786	0.331099	0.387659	0	0
627	Fibroblasts	4	ENSMUSG00000039252	Lgi2	0.269808	2.0515	0.687691	0.392339	0.349818	0	0
628	Fibroblasts	4	ENSMUSG00000042436	Mfap4	0.209661	1.9882	0.634791	0.330283	0.234064	1.14497e-272	1.07804e-266
629	Fibroblasts	4	ENSMUSG00000028369	Svep1	0.146802	0.911959	0.48118	0.305088	0.211085	9.562e-245	9.00306e-239
630	Fibroblasts	4	ENSMUSG00000033880	Lgals3bp	0.154404	1.16876	0.54527	0.28317	0.201717	1.8764e-233	1.76672e-227
631	Fibroblasts	4	ENSMUSG00000037379	Spon2	0.204064	1.91233	0.652085	0.31294	0.249898	4.30032e-292	4.04894e-286
632	Fibroblasts	4	ENSMUSG00000042254	Cilp	0.12989	0.747502	0.393693	0.329928	0.183414	1.54733e-211	1.45688e-205
633	Fibroblasts	4	ENSMUSG00000040249	Lrp1	0.190557	2.16999	0.722279	0.263828	0.278495	0	0
634	Fibroblasts	4	ENSMUSG00000048126	Col6a3	0.325212	9.19364	0.93998	0.345978	0.464557	0	0
635	Fibroblasts	4	ENSMUSG00000006369	Fbln1	0.242422	3.40534	0.77823	0.311504	0.326822	0	0
636	Fibroblasts	4	ENSMUSG00000048376	F2r	0.2469	1.71574	0.620549	0.397873	0.332899	0	0
637	Fibroblasts	4	ENSMUSG00000066705	Fxyd6	0.144841	2.08643	0.761953	0.190091	0.101347	1.4282e-115	1.34471e-109
638	Fibroblasts	4	ENSMUSG00000026042	Col5a2	0.130404	1.73016	0.689725	0.189066	0.112047	7.06084e-128	6.6481e-122
639	Fibroblasts	4	ENSMUSG00000026043	Col3a1	0.140933	8.50435	0.964395	0.146136	0.147107	1.26055e-168	1.18686e-162
640	Fibroblasts	4	ENSMUSG00000067586	S1pr3	0.140674	0.807595	0.446592	0.314994	0.174159	1.58219e-200	1.4897e-194
641	Fibroblasts	4	ENSMUSG00000025809	Itgb1	0.13391	4.43648	0.912513	0.146749	0.0823668	6.9078e-94	6.504e-88
642	Fibroblasts	4	ENSMUSG00000019899	Lama2	0.142733	0.643823	0.375381	0.380234	0.186618	2.3298e-215	2.19361e-209
643	Fibroblasts	4	ENSMUSG00000070436	Serpinh1	0.132794	3.90442	0.886063	0.149869	0.108504	8.50193e-124	8.00495e-118
644	Fibroblasts	4	ENSMUSG00000053062	Jam2	0.198179	1.19637	0.560529	0.353557	0.271079	2.55227395722546e-318	2.40308078305585e-312
645	Fibroblasts	4	ENSMUSG00000074971	Fibin	0.282975	2.49333	0.673449	0.420188	0.35359	0	0
646	Fibroblasts	4	ENSMUSG00000019929	Dcn	0.201966	10.8938	0.95117	0.212335	0.291367	0	0
647	Fibroblasts	4	ENSMUSG00000055632	Hmcn2	0.176126	2.39672	0.77823	0.226316	0.243098	9.89233e-284	9.31407e-278
648	Fibroblasts	4	ENSMUSG00000058297	Spock2	0.146084	0.985035	0.512716	0.284921	0.181966	8.24244e-210	7.76062e-204
649	Fibroblasts	4	ENSMUSG00000021943	Gdf10	0.178366	1.30567	0.482197	0.369903	0.231884	5.26566e-270	4.95785e-264
650	Fibroblasts	4	ENSMUSG00000023885	Thbs2	0.354766	3.16719	0.7294	0.486381	0.440862	0	0
651	Neuroglia	5	ENSMUSG00000000489	Pdgfb	0.256089	0.80261	0.580569	0.4411	0.333915	0	0
652	Neuroglia	5	ENSMUSG00000002985	Apoe	0.263595	11.9337	0.920616	0.286325	0.365251	0	0
653	Neuroglia	5	ENSMUSG00000018822	Sfrp5	0.265349	0.584155	0.414692	0.63987	0.281617	1.10332e-304	1.03883e-298
654	Neuroglia	5	ENSMUSG00000022103	Gfra2	0.300661	0.832219	0.623223	0.48243	0.334732	0	0
655	Neuroglia	5	ENSMUSG00000022324	Matn2	0.334333	1.99853	0.67891	0.492456	0.368428	0	0
656	Neuroglia	5	ENSMUSG00000025089	Gfra1	0.242709	0.426294	0.439573	0.552147	0.264771	1.69247e-285	1.59354e-279
657	Neuroglia	5	ENSMUSG00000025780	Itih5	0.268824	4.2238	0.795024	0.338134	0.239948	1.70089e-257	1.60146e-251
658	Neuroglia	5	ENSMUSG00000026249	Serpine2	0.274455	1.77724	0.792654	0.346248	0.360274	0	0
659	Neuroglia	5	ENSMUSG00000026424	Gpr37l1	0.56909	2.0959	0.816351	0.697114	0.615996	0	0
660	Neuroglia	5	ENSMUSG00000027375	Mal	0.283049	0.431484	0.39455	0.717397	0.291591	4.09926790064067e-316	3.85964519550872e-310
661	Neuroglia	5	ENSMUSG00000030342	Cd9	0.236414	2.80219	0.805687	0.293431	0.296265	1.72922976044436e-321	1.62814763479759e-315
662	Neuroglia	5	ENSMUSG00000031425	Plp1	0.544622	2.25976	0.806872	0.67498	0.580684	0	0
663	Neuroglia	5	ENSMUSG00000031610	Scrg1	0.22662	0.25909	0.32109	0.705782	0.213695	3.19514e-228	3.00836e-222
664	Neuroglia	5	ENSMUSG00000038400	Pmepa1	0.424642	4.91617	0.913507	0.464848	0.577867	0	0
665	Neuroglia	5	ENSMUSG00000033208	S100b	0.265798	0.56063	0.462085	0.575214	0.267696	8.10616e-289	7.63231e-283
666	Neuroglia	5	ENSMUSG00000040759	Cmtm5	0.355697	0.538536	0.522512	0.680744	0.360948	0	0
667	Neuroglia	5	ENSMUSG00000040724	Kcna2	0.295425	0.781785	0.524882	0.562842	0.292964	1.08439108959303e-317	1.02100300845087e-311
668	Neuroglia	5	ENSMUSG00000036570	Fxyd1	0.233989	3.10166	0.873223	0.267961	0.251171	4.06941e-270	3.83153e-264
669	Neuroglia	5	ENSMUSG00000033006	Sox10	0.39743	0.809032	0.597156	0.665537	0.404976	0	0
670	Neuroglia	5	ENSMUSG00000036169	Sostdc1	0.357314	0.845968	0.523697	0.682293	0.353808	0	0
671	Neuroglia	5	ENSMUSG00000034810	Scn7a	0.57902	3.83396	0.856635	0.675923	0.628688	0	0
672	Neuroglia	5	ENSMUSG00000040690	Col16a1	0.245141	1.42324	0.757109	0.323785	0.273431	2.42783e-295	2.28591e-289
673	Neuroglia	5	ENSMUSG00000039239	Tgfb2	0.287471	1.37098	0.700237	0.410534	0.322839	0	0
674	Neuroglia	5	ENSMUSG00000025856	Pdgfa	0.266693	2.2246	0.797393	0.334456	0.295374	1.83100728348766e-320	1.72397575273139e-314
675	Neuroglia	5	ENSMUSG00000042401	Crtac1	0.24282	0.610406	0.517773	0.46897	0.275483	1.11353e-297	1.04844e-291
676	Neuroglia	5	ENSMUSG00000047976	Kcna1	0.434627	1.22288	0.567536	0.765815	0.436132	0	0
677	Neuroglia	5	ENSMUSG00000044708	Kcnj10	0.225862	0.309993	0.311611	0.724819	0.20811	4.8656e-222	4.58118e-216
678	Neuroglia	5	ENSMUSG00000046618	Olfml2a	0.318693	0.533718	0.476303	0.669097	0.323796	0	0
679	Neuroglia	5	ENSMUSG00000031342	Gpm6b	0.414369	1.38948	0.688389	0.60194	0.457033	0	0
680	Neuroglia	5	ENSMUSG00000031391	L1cam	0.255759	1.07319	0.680095	0.376064	0.312151	0	0
681	Neuroglia	5	ENSMUSG00000030077	Chl1	0.227656	1.09372	0.637441	0.357141	0.274953	4.47334e-297	4.21185e-291
682	Neuroglia	5	ENSMUSG00000054793	Cadm4	0.234814	0.519632	0.476303	0.492993	0.258694	1.30045e-278	1.22444e-272
683	Neuroglia	5	ENSMUSG00000020926	Adam11	0.426589	1.46324	0.687204	0.62076	0.438911	0	0
684	Neuroglia	5	ENSMUSG00000073418	C4b	0.239452	0.864597	0.552133	0.433685	0.279551	2.53468e-302	2.38652e-296
685	Neuroglia	5	ENSMUSG00000032268	Tmprss5	0.379108	0.674935	0.517773	0.73219	0.361953	0	0
686	Neuroglia	5	ENSMUSG00000032332	Col12a1	0.34984	2.24754	0.787915	0.444008	0.358123	0	0
687	Neuroglia	5	ENSMUSG00000032373	Car12	0.241435	0.383076	0.362559	0.665918	0.240313	6.63675e-258	6.2488e-252
688	Neuroglia	5	ENSMUSG00000001435	Col18a1	0.344961	0.767661	0.562796	0.612941	0.374988	0	0
689	Neuroglia	5	ENSMUSG00000027750	Postn	0.227561	2.82579	0.804502	0.28286	0.224572	2.62034e-240	2.46717e-234
690	Neuroglia	5	ENSMUSG00000057969	Sema3b	0.233735	0.637776	0.533175	0.438382	0.268811	4.37471e-290	4.11899e-284
691	Neuroglia	5	ENSMUSG00000056966	Gjc3	0.268802	0.368934	0.408768	0.657592	0.281817	6.52257e-305	6.14129e-299
692	Neuroglia	5	ENSMUSG00000067261	Foxd3	0.346908	0.53349	0.491706	0.705518	0.359523	0	0
693	Neuroglia	5	ENSMUSG00000025964	Adam23	0.378889	0.787935	0.604265	0.627024	0.395938	0	0
694	Neuroglia	5	ENSMUSG00000068748	Ptprz1	0.40359	1.37174	0.725118	0.556584	0.425742	0	0
695	Neuroglia	5	ENSMUSG00000027966	Col11a1	0.291659	0.769325	0.409953	0.711444	0.280604	1.58746e-303	1.49467e-297
696	Neuroglia	5	ENSMUSG00000047216	Cdh19	0.425447	0.727008	0.584123	0.728351	0.421494	0	0
697	Neuroglia	5	ENSMUSG00000039546	Ajap1	0.290391	0.510521	0.414692	0.700258	0.288018	5.16126189727191e-312	4.85956e-306
698	Neuroglia	5	ENSMUSG00000016356	Col20a1	0.357023	1.52304	0.549763	0.649412	0.332753	0	0
699	Neuroglia	5	ENSMUSG00000039542	Ncam1	0.362473	2.46883	0.848341	0.427273	0.48193	0	0
700	Neuroglia	5	ENSMUSG00000024998	Plce1	0.228836	0.92651	0.590047	0.387826	0.2665	1.84911e-287	1.74102e-281
701	Fibroblasts	7	ENSMUSG00000000901	Mmp11	0.156034	0.534214	0.276316	0.564696	0.147292	5.76685e-119	5.42974e-113
702	Fibroblasts	7	ENSMUSG00000001349	Cnn1	0.103123	3.9232	0.885338	0.116479	0.00150832	0.0203825	1
703	Fibroblasts	7	ENSMUSG00000003534	Ddr1	0.0970506	0.742986	0.411654	0.235758	0.0857996	2.04799e-69	1.92828e-63
704	Fibroblasts	7	ENSMUSG00000007892	Rplp1	0.101097	4.48129	0.917293	0.110212	0.00708507	4.9366e-07	0.464803
705	Fibroblasts	7	ENSMUSG00000020599	Rgs9	0.162164	0.635441	0.31391	0.516596	0.135501	2.1634e-109	2.03694e-103
706	Fibroblasts	7	ENSMUSG00000021094	Dhrs7	0.118074	0.97149	0.385338	0.306416	0.108356	1.75403e-87	1.6515e-81
707	Fibroblasts	7	ENSMUSG00000021508	Cxcl14	0.464822	3.98465	0.612782	0.758543	0.408448	0	0
708	Fibroblasts	7	ENSMUSG00000021702	Thbs4	0.255062	1.68277	0.411654	0.619602	0.280839	4.92502e-230	4.63713e-224
709	Fibroblasts	7	ENSMUSG00000023886	Smoc2	0.177426	2.37349	0.631579	0.280925	0.126677	3.00027e-102	2.82489e-96
710	Fibroblasts	7	ENSMUSG00000024526	Cidea	0.171154	0.568055	0.268797	0.636739	0.173557	2.00749e-140	1.89014e-134
711	Fibroblasts	7	ENSMUSG00000026208	Des	0.117077	11.1587	0.981203	0.11932	0.00253372	0.0026457	1
712	Fibroblasts	7	ENSMUSG00000026421	Csrp1	0.12042	5.16628	0.93609	0.128642	0.00685959	7.49776e-07	0.705948
713	Fibroblasts	7	ENSMUSG00000028464	Tpm2	0.102277	14.2829	0.996241	0.102663	0.000662517	0.1243	1
714	Fibroblasts	7	ENSMUSG00000032366	Tpm1	0.122017	13.1843	0.996241	0.122478	0.0153108	1.39019e-13	1.30893e-07
715	Fibroblasts	7	ENSMUSG00000029309	Sparcl1	0.180013	5.93709	0.902256	0.199514	0.119835	1.00325e-96	9.44606e-91
716	Fibroblasts	7	ENSMUSG00000029669	Tspan12	0.256712	1.32815	0.5	0.513423	0.26497	1.42196e-216	1.33884e-210
717	Fibroblasts	7	ENSMUSG00000030029	Lrig1	0.260314	1.68302	0.609023	0.427428	0.326475	3.71629e-269	3.49905e-263
718	Fibroblasts	7	ENSMUSG00000030043	Tacr1	0.113257	0.360999	0.191729	0.590712	0.0924414	1.00873e-74	9.49766e-69
719	Fibroblasts	7	ENSMUSG00000030096	Slc6a6	0.144934	1.45636	0.541353	0.267725	0.18064	3.05106e-146	2.87271e-140
720	Fibroblasts	7	ENSMUSG00000031328	Flna	0.12515	5.99366	0.964286	0.129785	0.0153653	1.25874e-13	1.18516e-07
721	Fibroblasts	7	ENSMUSG00000031548	Sfrp1	0.162291	2.14762	0.43797	0.370553	0.124875	8.58597e-101	8.08407e-95
722	Fibroblasts	7	ENSMUSG00000031586	Rbpms	0.127021	2.29135	0.665414	0.190891	0.0860897	1.20165e-69	1.13141e-63
723	Fibroblasts	7	ENSMUSG00000032085	Tagln	0.131908	5.00999	0.941729	0.14007	0.0157677	6.04461e-14	5.69127e-08
724	Fibroblasts	7	ENSMUSG00000032338	Hcn4	0.147591	0.39785	0.229323	0.643593	0.136209	5.77836e-110	5.44058e-104
725	Fibroblasts	7	ENSMUSG00000038319	Kcnh2	0.114663	0.771439	0.415414	0.276021	0.119735	1.2086e-96	1.13795e-90
726	Fibroblasts	7	ENSMUSG00000038591	Colec10	0.114162	0.446657	0.281955	0.404896	0.105775	2.07489e-85	1.9536e-79
727	Fibroblasts	7	ENSMUSG00000036264	Fstl4	0.137099	0.391711	0.225564	0.607805	0.129634	1.21884e-104	1.14759e-98
728	Fibroblasts	7	ENSMUSG00000035783	Acta2	0.110216	18.7848	0.99812	0.110423	0.00359972	0.000339061	1
729	Fibroblasts	7	ENSMUSG00000035493	Tgfbi	0.193651	2.19475	0.684211	0.283029	0.195569	1.50495e-158	1.41698e-152
730	Fibroblasts	7	ENSMUSG00000037852	Cpe	0.115278	2.80086	0.783835	0.147069	0.0553559	3.27035e-45	3.07918e-39
731	Fibroblasts	7	ENSMUSG00000053907	Mat2a	0.14911	2.10969	0.620301	0.240384	0.124172	3.16986e-100	2.98456e-94
732	Fibroblasts	7	ENSMUSG00000048616	Nog	0.326681	1.07158	0.43797	0.745897	0.311265	4.7698e-256	4.49098e-250
733	Fibroblasts	7	ENSMUSG00000031283	Chrdl1	0.311209	1.15839	0.451128	0.689846	0.287179	1.96934e-235	1.85422e-229
734	Fibroblasts	7	ENSMUSG00000030077	Chl1	0.103759	0.870621	0.345865	0.299999	0.0851551	6.69614e-69	6.30472e-63
735	Fibroblasts	7	ENSMUSG00000026387	Sctr	0.230995	0.899007	0.31391	0.735863	0.209382	5.43978e-170	5.1218e-164
736	Fibroblasts	7	ENSMUSG00000059430	Actg2	0.109493	19.1951	0.99812	0.109699	0.00185732	0.0100626	1
737	Fibroblasts	7	ENSMUSG00000031673	Cdh11	0.105771	0.896296	0.454887	0.232522	0.0942381	3.6834e-76	3.46808e-70
738	Fibroblasts	7	ENSMUSG00000063727	Tnfrsf11b	0.207873	1.22245	0.49812	0.417314	0.203734	2.63186e-165	2.47801e-159
739	Fibroblasts	7	ENSMUSG00000067818	Myl9	0.113975	9.71254	0.986842	0.115494	0.00916962	1.05371e-08	0.00992113
740	Fibroblasts	7	ENSMUSG00000018830	Myh11	0.113334	10.859	0.984962	0.115064	0.00393336	0.000179711	1
741	Fibroblasts	7	ENSMUSG00000074934	Grem1	0.308227	3.22106	0.678571	0.45423	0.266736	4.55769e-218	4.29127e-212
742	Fibroblasts	7	ENSMUSG00000087006	Gm13889	0.11308	0.716946	0.334586	0.337969	0.0926034	7.48512e-75	7.04758e-69
743	Fibroblasts	7	ENSMUSG00000057530	Ece1	0.271551	2.86499	0.734962	0.369476	0.373725	2.50551441914018e-310	2.35905e-304
744	Fibroblasts	7	ENSMUSG00000063564	Col23a1	0.129004	0.473192	0.259398	0.497319	0.145979	6.74315e-118	6.34898e-112
745	Fibroblasts	7	ENSMUSG00000055632	Hmcn2	0.109339	1.7437	0.614662	0.177885	0.0824764	9.18748e-67	8.65043e-61
746	Fibroblasts	7	ENSMUSG00000062980	Cped1	0.151898	1.10294	0.492481	0.308433	0.143984	2.82224e-116	2.65726e-110
747	Fibroblasts	7	ENSMUSG00000032572	Col6a4	0.114972	0.292688	0.159774	0.719592	0.110543	3.05565e-89	2.87703e-83
748	Fibroblasts	7	ENSMUSG00000090841	Myl6	0.11692	8.36219	0.988722	0.118253	0.0100543	2.07352e-09	0.00195232
749	Fibroblasts	7	ENSMUSG00000070469	Adamtsl3	0.114264	0.517957	0.285714	0.399924	0.102418	1.02769e-82	9.67612e-77
750	Fibroblasts	7	ENSMUSG00000092341	Malat1	0.101301	37.598	0.994361	0.101875	0.0652666	4.53753e-53	4.27229e-47
751	NENs	8	ENSMUSG00000055022	Cntn1	0.29954	0.609483	0.505703	0.592323	0.272797	1.34117e-221	1.26277e-215
752	NENs	8	ENSMUSG00000003410	Elavl3	0.295102	0.512909	0.522814	0.564449	0.310165	2.95696e-253	2.78412e-247
753	NENs	8	ENSMUSG00000019796	Lrp11	0.290948	0.52561	0.442966	0.656819	0.25612	1.33524e-207	1.25719e-201
754	NENs	8	ENSMUSG00000020297	Nsg2	0.380277	1.949	0.760456	0.500065	0.369935	9.48246e-305	8.92817e-299
755	NENs	8	ENSMUSG00000021087	Rtn1	0.648879	6.93268	0.935361	0.693721	0.674774	0	0
756	NENs	8	ENSMUSG00000022577	Ly6h	0.302948	0.604348	0.480989	0.629845	0.280063	1.0087e-227	9.49733e-222
757	NENs	8	ENSMUSG00000023011	Faim2	0.322311	0.602337	0.501901	0.64218	0.300336	6.8746e-245	6.47275e-239
758	NENs	8	ENSMUSG00000023484	Prph	0.368044	1.59616	0.714829	0.514871	0.327934	1.88242e-268	1.77239e-262
759	NENs	8	ENSMUSG00000024261	Syt4	0.312765	1.23561	0.646388	0.483865	0.354448	2.65073e-291	2.49578e-285
760	NENs	8	ENSMUSG00000024907	Gal	0.346487	12.092	0.570342	0.607508	0.112329	4.73366e-90	4.45696e-84
761	NENs	8	ENSMUSG00000026204	Ptprn	0.535497	3.0257	0.874525	0.612329	0.523495	0	0
762	NENs	8	ENSMUSG00000027273	Snap25	0.382277	0.747663	0.608365	0.628368	0.345717	9.36833e-284	8.82071e-278
763	NENs	8	ENSMUSG00000027350	Chgb	0.369336	1.51925	0.553232	0.667597	0.323226	2.04168e-264	1.92233e-258
764	NENs	8	ENSMUSG00000027419	Pcsk2	0.301097	0.548518	0.41635	0.723183	0.2684	6.69249e-218	6.30128e-212
765	NENs	8	ENSMUSG00000027500	Stmn2	0.407682	1.98156	0.828897	0.491836	0.430492	0	0
766	NENs	8	ENSMUSG00000028137	Celf3	0.389315	0.765474	0.589354	0.66058	0.389876	3.6066792146411e-322	3.39585078114925e-316
767	NENs	8	ENSMUSG00000029126	Nsg1	0.315576	1.15101	0.587452	0.537194	0.3006	4.0985e-245	3.85892e-239
768	NENs	8	ENSMUSG00000029219	Slc10a4	0.321702	0.533323	0.473384	0.679578	0.300807	2.73621e-245	2.57627e-239
769	NENs	8	ENSMUSG00000030110	Ret	0.335366	0.785182	0.595057	0.563587	0.350486	7.10709e-288	6.69165e-282
770	NENs	8	ENSMUSG00000032076	Cadm1	0.349098	1.30795	0.714829	0.488366	0.376462	1.94187822229593e-310	1.82837e-304
771	NENs	8	ENSMUSG00000032181	Scg3	0.32953	1.32789	0.676806	0.48689	0.320272	6.90123e-262	6.49782e-256
772	NENs	8	ENSMUSG00000032303	Chrna3	0.399998	0.679676	0.56654	0.706037	0.357335	8.3666e-294	7.87753e-288
773	NENs	8	ENSMUSG00000033061	Resp18	0.457849	1.75364	0.707224	0.647388	0.411858	0	0
774	NENs	8	ENSMUSG00000039278	Pcsk1n	0.546502	5.62952	0.922053	0.592701	0.560696	0	0
775	NENs	8	ENSMUSG00000004113	Cacna1b	0.333359	0.508635	0.51711	0.644657	0.299899	1.61536e-244	1.52094e-238
776	NENs	8	ENSMUSG00000037428	Vgf	0.376238	1.01186	0.538023	0.699297	0.33631	1.19919e-275	1.12909e-269
777	NENs	8	ENSMUSG00000070695	Cntnap5a	0.298052	0.435785	0.401141	0.74301	0.268156	1.07395e-217	1.01117e-211
778	NENs	8	ENSMUSG00000035964	Tmem59l	0.363907	0.666	0.51711	0.703733	0.335067	1.4061e-274	1.32391e-268
779	NENs	8	ENSMUSG00000041608	Entpd3	0.305068	0.444271	0.444867	0.68575	0.27634	1.39229e-224	1.31091e-218
780	NENs	8	ENSMUSG00000050711	Scg2	0.628591	7.29333	0.880228	0.714123	0.578695	0	0
781	NENs	8	ENSMUSG00000024109	Nrxn1	0.363564	0.523611	0.511407	0.710909	0.357269	9.54017e-294	8.9825e-288
782	NENs	8	ENSMUSG00000044288	Cnr1	0.357051	0.960471	0.543726	0.656673	0.32051	4.31654e-262	4.06422e-256
783	NENs	8	ENSMUSG00000055567	Unc80	0.316831	0.366053	0.412548	0.767987	0.28646	3.97965e-233	3.74702e-227
784	NENs	8	ENSMUSG00000035864	Syt1	0.480526	1.80207	0.726236	0.661667	0.472916	0	0
785	NENs	8	ENSMUSG00000004961	Syt5	0.315002	0.489391	0.494297	0.637273	0.283259	2.01839e-230	1.90041e-224
786	NENs	8	ENSMUSG00000057182	Scn3a	0.373734	0.500241	0.524715	0.712261	0.366428	1.06779e-301	1.00537e-295
787	NENs	8	ENSMUSG00000054013	Tmem179	0.320109	0.540785	0.486692	0.657723	0.305477	2.91771e-249	2.74716e-243
788	NENs	8	ENSMUSG00000061576	Dpp6	0.369334	0.740609	0.564639	0.654107	0.3479	1.2206e-285	1.14925e-279
789	NENs	8	ENSMUSG00000033981	Gria2	0.328985	0.457273	0.425856	0.772527	0.30706	1.30832e-250	1.23184e-244
790	NENs	8	ENSMUSG00000061762	Tac1	0.301445	3.51109	0.488593	0.616966	0.189747	1.17239e-152	1.10386e-146
791	NENs	8	ENSMUSG00000068923	Syt11	0.357455	1.98826	0.802281	0.445549	0.377859	1.17117443932596e-311	1.10271e-305
792	NENs	8	ENSMUSG00000069072	Slc7a14	0.392169	0.754017	0.564639	0.694548	0.381067	1.84853964462502e-314	0
793	NENs	8	ENSMUSG00000023945	Slc5a7	0.371101	0.686927	0.532319	0.69714	0.338038	3.90097e-277	3.67293e-271
794	NENs	8	ENSMUSG00000018411	Mapt	0.321668	0.675804	0.585551	0.549342	0.318981	8.7673e-261	8.25481e-255
795	NENs	8	ENSMUSG00000028546	Elavl4	0.396578	0.880922	0.646388	0.613529	0.357407	7.24788e-294	6.82421e-288
796	NENs	8	ENSMUSG00000027581	Stmn3	0.364941	1.20822	0.711027	0.51326	0.364282	7.8383e-300	7.38011e-294
797	NENs	8	ENSMUSG00000044349	Snhg11	0.531562	4.61164	0.768061	0.692083	0.508966	0	0
798	NENs	8	ENSMUSG00000021268	Meg3	0.295119	11.6824	0.859316	0.343435	0.358458	8.89365e-295	8.37378e-289
799	NENs	8	ENSMUSG00000021700	Rab3c	0.301881	0.671258	0.5	0.603762	0.27474	3.09928e-223	2.91811e-217
800	NENs	8	ENSMUSG00000097311	Gm26871	0.364572	0.423629	0.435361	0.837401	0.335156	1.17877e-274	1.10986e-268
801	MENs	9	ENSMUSG00000001025	S100a6	0.262503	8.95405	0.952941	0.275466	0.334107	2.44834e-268	2.30523e-262
802	MENs	9	ENSMUSG00000002980	Bcam	0.233576	1.94292	0.715686	0.326367	0.202281	8.37061e-160	7.88131e-154
803	MENs	9	ENSMUSG00000006360	Crip1	0.269406	12.0193	0.960784	0.280403	0.2921	3.10531e-233	2.92379e-227
804	MENs	9	ENSMUSG00000020911	Krt19	0.298328	1.66078	0.731373	0.407901	0.27864	4.32166e-222	4.06904e-216
805	MENs	9	ENSMUSG00000009281	Rarres2	0.342754	6.30913	0.917647	0.373514	0.350772	2.10002e-282	1.97727e-276
806	MENs	9	ENSMUSG00000017969	Ptgis	0.219218	1.40115	0.737255	0.297344	0.236205	2.77466e-187	2.61246e-181
807	MENs	9	ENSMUSG00000020186	Csrp2	0.240573	3.07099	0.688235	0.349551	0.176876	2.02278e-139	1.90454e-133
808	MENs	9	ENSMUSG00000020467	Efemp1	0.338016	1.39049	0.721569	0.468446	0.371318	7.41352e-300	6.98016e-294
809	MENs	9	ENSMUSG00000023046	Igfbp6	0.544827	14.8888	0.982353	0.554614	0.750532	0	0
810	MENs	9	ENSMUSG00000023224	Serping1	0.215587	1.91751	0.809804	0.266222	0.237843	1.28303e-188	1.20803e-182
811	MENs	9	ENSMUSG00000024164	C3	0.54539	11.9156	0.984314	0.554082	0.699786	0	0
812	MENs	9	ENSMUSG00000026185	Igfbp5	0.278489	2.37619	0.682353	0.40813	0.271948	1.43828e-216	1.3542e-210
813	MENs	9	ENSMUSG00000027357	Crls1	0.23902	0.628381	0.54902	0.435358	0.224595	7.61049e-178	7.16562e-172
814	MENs	9	ENSMUSG00000053897	Slc39a8	0.226658	0.382653	0.343137	0.660545	0.176146	7.74319e-139	7.29056e-133
815	MENs	9	ENSMUSG00000028583	Pdpn	0.285919	0.919487	0.639216	0.447296	0.281347	2.50525e-224	2.3588e-218
816	MENs	9	ENSMUSG00000028871	Rspo1	0.337464	0.845987	0.607843	0.555184	0.299197	3.95146e-239	3.72048e-233
817	MENs	9	ENSMUSG00000031112	Stk26	0.18422	0.188907	0.329412	0.55924	0.163276	1.41104e-128	1.32856e-122
818	MENs	9	ENSMUSG00000031517	Gpm6a	0.451723	1.09088	0.668627	0.675598	0.392888	2.58896327208563e-318	2.43762542401587e-312
819	MENs	9	ENSMUSG00000109564	Muc16	0.344017	0.60158	0.496078	0.693474	0.287124	4.14488e-229	3.90259e-223
820	MENs	9	ENSMUSG00000032231	Anxa2	0.204954	2.26016	0.801961	0.255566	0.220292	2.34703e-174	2.20984e-168
821	MENs	9	ENSMUSG00000039457	Ppl	0.230079	0.27803	0.376471	0.611148	0.191735	2.53313e-151	2.38505e-145
822	MENs	9	ENSMUSG00000039831	Arhgap29	0.208332	0.707587	0.570588	0.365118	0.229254	1.25471e-181	1.18136e-175
823	MENs	9	ENSMUSG00000038725	Pkhd1l1	0.31495	0.490389	0.480392	0.65561	0.267413	7.79957e-213	7.34365e-207
824	MENs	9	ENSMUSG00000040713	Creg1	0.187684	0.863596	0.631373	0.297263	0.207451	5.67841e-164	5.34648e-158
825	MENs	9	ENSMUSG00000064080	Fbln2	0.194905	1.30316	0.711765	0.273834	0.258291	2.44451e-205	2.30162e-199
826	MENs	9	ENSMUSG00000022425	Enpp2	0.190931	0.887319	0.372549	0.512499	0.167484	6.30235e-132	5.93395e-126
827	MENs	9	ENSMUSG00000060962	Dmkn	0.267305	1.10447	0.621569	0.430049	0.24346	3.36398e-193	3.16734e-187
828	MENs	9	ENSMUSG00000040703	Cyp2s1	0.215164	0.447088	0.429412	0.501067	0.179492	1.63855e-141	1.54277e-135
829	MENs	9	ENSMUSG00000040170	Fmo2	0.245397	1.9261	0.509804	0.481355	0.233368	5.65689e-185	5.32622e-179
830	MENs	9	ENSMUSG00000042357	Gjb5	0.29371	0.414646	0.454902	0.645656	0.232279	4.35449e-184	4.09995e-178
831	MENs	9	ENSMUSG00000041559	Fmod	0.208107	0.315527	0.37451	0.555678	0.182526	6.12293e-144	5.76501e-138
832	MENs	9	ENSMUSG00000043110	Lrrn4	0.51439	1.6579	0.768627	0.669232	0.506167	0	0
833	MENs	9	ENSMUSG00000040856	Dlk1	0.266488	0.591768	0.405882	0.656565	0.217819	2.36363e-172	2.22546e-166
834	MENs	9	ENSMUSG00000049436	Upk1b	0.450819	1.1751	0.696078	0.647655	0.424612	0	0
835	MENs	9	ENSMUSG00000022665	Ccdc80	0.225868	2.48654	0.660784	0.341818	0.205528	2.01889e-162	1.90088e-156
836	MENs	9	ENSMUSG00000042985	Upk3b	0.565949	5.04962	0.947059	0.597586	0.614365	0	0
837	MENs	9	ENSMUSG00000052957	Gas1	0.20918	2.14984	0.817647	0.255831	0.211666	2.2419e-167	2.11085e-161
838	MENs	9	ENSMUSG00000023039	Krt7	0.30445	0.972478	0.629412	0.483706	0.268284	1.49659e-213	1.40911e-207
839	MENs	9	ENSMUSG00000063011	Msln	0.488152	3.7446	0.831373	0.587164	0.427866	0	0
840	MENs	9	ENSMUSG00000061451	Tmem151a	0.234403	0.535442	0.545098	0.430021	0.223555	5.30949e-177	4.99912e-171
841	MENs	9	ENSMUSG00000053522	Lgals7	0.234923	0.567254	0.44902	0.523191	0.202299	8.09886e-160	7.62545e-154
842	MENs	9	ENSMUSG00000036098	Myrf	0.225383	0.365042	0.423529	0.532155	0.215002	4.50479e-170	4.24146e-164
843	MENs	9	ENSMUSG00000016918	Sulf1	0.281158	0.765625	0.572549	0.491064	0.267454	7.22587e-213	6.80348e-207
844	MENs	9	ENSMUSG00000068220	Lgals1	0.231426	11.0449	0.858824	0.269469	0.0895203	1.49943e-70	1.41178e-64
845	MENs	9	ENSMUSG00000020473	Aebp1	0.437471	4.53306	0.943137	0.463847	0.559943	0	0
846	MENs	9	ENSMUSG00000027574	Nkain4	0.314765	1.12968	0.690196	0.456052	0.314108	1.45755e-251	1.37235e-245
847	MENs	9	ENSMUSG00000019929	Dcn	0.300217	17.401	0.992157	0.30259	0.47305	0	0
848	MENs	9	ENSMUSG00000017002	Slpi	0.542462	13.007	0.858824	0.631634	0.410076	0	0
849	MENs	9	ENSMUSG00000016458	Wt1	0.293277	0.58708	0.523529	0.560193	0.28382	2.2566e-226	2.12469e-220
850	MENs	9	ENSMUSG00000040612	Ildr2	0.244345	0.586081	0.523529	0.466727	0.247561	1.49946e-196	1.41181e-190
